# Supplementary material for: Dependence of pKa on solute cavity for diprotic and triprotic acids
Source: Royal Society of Chemistry journal article supplement (doi:10.1039/c1cp20161a), 2011-01-01
Supplement: c1cp20161a.pdf [file c1cp20161a.pdf]

**SUPPORTING INFORMATION**

Dependence of  $pK_a$  on Solute Cavity for Diprotic and Triprotic Acids

Tae Bum Lee and Michael L. McKee\*

Department of Chemistry and Biochemistry, Auburn University, Auburn,

Alabama 36849

mckee@chem.auburn.edu

Table S1. Point Group, DFT Method, Cavity Model, Total Energies (hartrees), Zero-point Energies (kcal/mol) with number of Imaginary Frequencies in Parentheses, Thermal Corrections (kcal/mol), Entropies (cal/mol·K), and Free energy of Solvation (kcal/mol)

|                                | PG <sup>a</sup> | DFT   | Cavity Model | SCF Energy | ZPE <sup>b</sup><br>(NIF) | TC <sup>c</sup> | S <sup>d</sup> | Solvation Free Energy <sup>e</sup> |
|--------------------------------|-----------------|-------|--------------|------------|---------------------------|-----------------|----------------|------------------------------------|
| CO <sub>3</sub> <sup>2-</sup>  | D <sub>3h</sub> | B3LYP | UFF          | -263.79277 | 8.20 (0)                  | 2.62            | 59.07          | -264.00                            |
| HCO <sub>3</sub> <sup>-</sup>  | C <sub>s</sub>  | B3LYP | UFF          | -264.57336 | 16.28 (0)                 | 2.82            | 63.70          | -244.44                            |
| H <sub>2</sub> CO <sub>3</sub> | C <sub>2v</sub> | B3LYP | UFF          | -265.12195 | 24.77 (0)                 | 2.92            | 62.91          | -63.63                             |
| CO <sub>3</sub> <sup>2-</sup>  | D <sub>3h</sub> | B3LYP | UAKS         | -263.79277 | 8.20 (0)                  | 2.62            | 59.07          | -3.83                              |
| HCO <sub>3</sub> <sup>-</sup>  | C <sub>s</sub>  | B3LYP | UAKS         | -264.57336 | 16.28 (0)                 | 2.82            | 63.70          | -255.08                            |
| H <sub>2</sub> CO <sub>3</sub> | C <sub>2v</sub> | B3LYP | UAKS         | -265.12195 | 24.77 (0)                 | 2.92            | 62.91          | -70.20                             |
| CO <sub>3</sub> <sup>2-</sup>  | D <sub>3h</sub> | B3LYP | Pauling      | -263.79277 | 8.20 (0)                  | 2.62            | 59.07          | -12.01                             |
| HCO <sub>3</sub> <sup>-</sup>  | C <sub>s</sub>  | B3LYP | Pauling      | -264.57336 | 16.28 (0)                 | 2.82            | 63.70          | -262.91                            |
| H <sub>2</sub> CO <sub>3</sub> | C <sub>2v</sub> | B3LYP | Pauling      | -265.12195 | 24.77 (0)                 | 2.92            | 62.91          | -73.01                             |
| CO <sub>3</sub> <sup>2-</sup>  | D <sub>3h</sub> | B3LYP | Klamt        | -263.79277 | 8.20 (0)                  | 2.62            | 59.07          | -13.02                             |
| HCO <sub>3</sub> <sup>-</sup>  | C <sub>s</sub>  | B3LYP | Klamt        | -264.57336 | 16.28 (0)                 | 2.82            | 63.70          | -246.01                            |
| H <sub>2</sub> CO <sub>3</sub> | C <sub>2v</sub> | B3LYP | Klamt        | -265.12195 | 24.77 (0)                 | 2.92            | 62.91          | -64.99                             |
| CO <sub>3</sub> <sup>2-</sup>  | D <sub>3h</sub> | B3LYP | SMD          | -263.79277 | 8.20 (0)                  | 2.62            | 59.07          | -255.86                            |
| HCO <sub>3</sub> <sup>-</sup>  | C <sub>s</sub>  | B3LYP | SMD          | -264.57336 | 16.28 (0)                 | 2.82            | 63.70          | -68.48                             |
| H <sub>2</sub> CO <sub>3</sub> | C <sub>2v</sub> | B3LYP | SMD          | -265.12195 | 24.77 (0)                 | 2.92            | 62.91          | -8.53                              |
| CO <sub>3</sub> <sup>2-</sup>  | D <sub>3h</sub> | PBE   | UFF          | -263.52597 | 7.77 (0)                  | 2.66            | 59.32          | -6.21                              |
| HCO <sub>3</sub> <sup>-</sup>  | C <sub>s</sub>  | PBE   | UFF          | -264.30257 | 15.67 (0)                 | 2.86            | 63.98          | -241.50                            |
| H <sub>2</sub> CO <sub>3</sub> | C <sub>2v</sub> | PBE   | UFF          | -264.84861 | 24.01 (0)                 | 2.96            | 63.15          | -62.59                             |
| CO <sub>3</sub> <sup>2-</sup>  | D <sub>3h</sub> | PBE   | UAKS         | -263.52597 | 7.77 (0)                  | 2.66            | 59.32          | -3.43                              |
| HCO <sub>3</sub> <sup>-</sup>  | C <sub>s</sub>  | PBE   | UAKS         | -264.30257 | 15.67 (0)                 | 2.86            | 63.98          | -251.73                            |
| H <sub>2</sub> CO <sub>3</sub> | C <sub>2v</sub> | PBE   | UAKS         | -264.84861 | 24.01 (0)                 | 2.96            | 63.15          | -68.79                             |
| CO <sub>3</sub> <sup>2-</sup>  | D <sub>3h</sub> | PBE   | Pauling      | -263.52597 | 7.77 (0)                  | 2.66            | 59.32          | -11.66                             |
| HCO <sub>3</sub> <sup>-</sup>  | C <sub>s</sub>  | PBE   | Pauling      | -264.30257 | 15.67 (0)                 | 2.86            | 63.98          | -258.57                            |
| H <sub>2</sub> CO <sub>3</sub> | C <sub>2v</sub> | PBE   | Pauling      | -264.84861 | 24.01 (0)                 | 2.96            | 63.15          | -70.86                             |
| CO <sub>3</sub> <sup>2-</sup>  | D <sub>3h</sub> | PBE   | Klamt        | -263.52597 | 7.77 (0)                  | 2.66            | 59.32          | -12.42                             |
| HCO <sub>3</sub> <sup>-</sup>  | C <sub>s</sub>  | PBE   | Klamt        | -264.30257 | 15.67 (0)                 | 2.86            | 63.98          | -242.96                            |
| H <sub>2</sub> CO <sub>3</sub> | C <sub>2v</sub> | PBE   | Klamt        | -264.84861 | 24.01 (0)                 | 2.96            | 63.15          | -63.91                             |
| CO <sub>3</sub> <sup>2-</sup>  | D <sub>3h</sub> | PBE   | SMD          | -263.52597 | 7.77 (0)                  | 2.66            | 59.32          | -252.26                            |
| HCO <sub>3</sub> <sup>-</sup>  | C <sub>s</sub>  | PBE   | SMD          | -264.30257 | 15.67 (0)                 | 2.86            | 63.98          | -66.85                             |
| H <sub>2</sub> CO <sub>3</sub> | C <sub>2v</sub> | PBE   | SMD          | -264.84861 | 24.01 (0)                 | 2.96            | 63.15          | -7.94                              |
| CO <sub>3</sub> <sup>2-</sup>  | D <sub>3h</sub> | BVP86 | UFF          | -263.82022 | 7.75 (0)                  | 2.66            | 59.32          | -5.45                              |
| HCO <sub>3</sub> <sup>-</sup>  | C <sub>s</sub>  | BVP86 | UFF          | -264.59765 | 15.62 (0)                 | 2.87            | 64.01          | -242.42                            |
| H <sub>2</sub> CO <sub>3</sub> | C <sub>2v</sub> | BVP86 | UFF          | -265.14436 | 23.96 (0)                 | 2.96            | 63.16          | -62.89                             |
| CO <sub>3</sub> <sup>2-</sup>  | D <sub>3h</sub> | BVP86 | UAKS         | -263.82022 | 7.75 (0)                  | 2.66            | 59.32          | -3.47                              |
| HCO <sub>3</sub> <sup>-</sup>  | C <sub>s</sub>  | BVP86 | UAKS         | -264.59765 | 15.62 (0)                 | 2.87            | 64.01          | -252.79                            |
| H <sub>2</sub> CO <sub>3</sub> | C <sub>2v</sub> | BVP86 | UAKS         | -265.14436 | 23.96 (0)                 | 2.96            | 63.16          | -69.12                             |
| CO <sub>3</sub> <sup>2-</sup>  | D <sub>3h</sub> | BVP86 | Pauling      | -263.82022 | 7.75 (0)                  | 2.66            | 59.32          | -11.69                             |
| HCO <sub>3</sub> <sup>-</sup>  | C <sub>s</sub>  | BVP86 | Pauling      | -264.59765 | 15.62 (0)                 | 2.87            | 64.01          | -259.87                            |

|                                |                 |       |         |            |           |      |       |         |
|--------------------------------|-----------------|-------|---------|------------|-----------|------|-------|---------|
| H <sub>2</sub> CO <sub>3</sub> | C <sub>2v</sub> | BVP86 | Pauling | -265.14436 | 23.96 (0) | 2.96 | 63.16 | -71.36  |
| CO <sub>3</sub> <sup>2-</sup>  | D <sub>3h</sub> | BVP86 | Klamt   | -263.82022 | 7.75 (0)  | 2.66 | 59.32 | -12.54  |
| HCO <sub>3</sub> <sup>-</sup>  | C <sub>s</sub>  | BVP86 | Klamt   | -264.59765 | 15.62 (0) | 2.87 | 64.01 | -243.91 |
| H <sub>2</sub> CO <sub>3</sub> | C <sub>2v</sub> | BVP86 | Klamt   | -265.14436 | 23.96 (0) | 2.96 | 63.16 | -64.22  |
| CO <sub>3</sub> <sup>2-</sup>  | D <sub>3h</sub> | BVP86 | Klamt   | -263.82022 | 7.75 (0)  | 2.66 | 59.32 | -253.45 |
| HCO <sub>3</sub> <sup>-</sup>  | C <sub>s</sub>  | BVP86 | Klamt   | -264.59765 | 15.62 (0) | 2.87 | 64.01 | -67.29  |
| H <sub>2</sub> CO <sub>3</sub> | C <sub>2v</sub> | BVP86 | Klamt   | -265.14436 | 23.96 (0) | 2.96 | 63.16 | -8.03   |
| CO <sub>3</sub> <sup>2-</sup>  | D <sub>3h</sub> | M052X | UFF     | -263.76479 | 8.63 (0)  | 2.59 | 58.91 | -5.49   |
| HCO <sub>3</sub> <sup>-</sup>  | C <sub>s</sub>  | M052X | UFF     | -264.54603 | 16.78 (0) | 2.78 | 63.46 | -248.54 |
| H <sub>2</sub> CO <sub>3</sub> | C <sub>2v</sub> | M052X | UFF     | -265.09311 | 25.25 (0) | 2.89 | 62.72 | -65.15  |
| CO <sub>3</sub> <sup>2-</sup>  | D <sub>3h</sub> | M052X | UAKS    | -263.76479 | 8.63 (0)  | 2.59 | 58.91 | -4.33   |
| HCO <sub>3</sub> <sup>-</sup>  | C <sub>s</sub>  | M052X | UAKS    | -264.54603 | 16.78 (0) | 2.78 | 63.46 | -259.86 |
| H <sub>2</sub> CO <sub>3</sub> | C <sub>2v</sub> | M052X | UAKS    | -265.09311 | 25.25 (0) | 2.89 | 62.72 | -71.75  |
| CO <sub>3</sub> <sup>2-</sup>  | D <sub>3h</sub> | M052X | Pauling | -263.76479 | 8.63 (0)  | 2.59 | 58.91 | -12.61  |
| HCO <sub>3</sub> <sup>-</sup>  | C <sub>s</sub>  | M052X | Pauling | -264.54603 | 16.78 (0) | 2.78 | 63.46 | -269.03 |
| H <sub>2</sub> CO <sub>3</sub> | C <sub>2v</sub> | M052X | Pauling | -265.09311 | 25.25 (0) | 2.89 | 62.72 | -75.38  |
| CO <sub>3</sub> <sup>2-</sup>  | D <sub>3h</sub> | M052X | Klamt   | -263.76479 | 8.63 (0)  | 2.59 | 58.91 | -14.07  |
| HCO <sub>3</sub> <sup>-</sup>  | C <sub>s</sub>  | M052X | Klamt   | -264.54603 | 16.78 (0) | 2.78 | 63.46 | -250.18 |
| H <sub>2</sub> CO <sub>3</sub> | C <sub>2v</sub> | M052X | Klmat   | -265.09311 | 25.25 (0) | 2.89 | 62.72 | -66.61  |
| CO <sub>3</sub> <sup>2-</sup>  | D <sub>3h</sub> | M052X | SMD     | -263.76479 | 8.63 (0)  | 2.59 | 58.91 | -261.00 |
| HCO <sub>3</sub> <sup>-</sup>  | C <sub>s</sub>  | M052X | SMD     | -264.54603 | 16.78 (0) | 2.78 | 63.46 | -70.45  |
| H <sub>2</sub> CO <sub>3</sub> | C <sub>2v</sub> | M052X | SMD     | -265.09311 | 25.25 (0) | 2.89 | 62.72 | -9.09   |
| SO <sub>3</sub> <sup>2-</sup>  | C <sub>3v</sub> | B3LYP | UFF     | -623.89243 | 5.80 (0)  | 2.95 | 63.78 | -231.27 |
| HSO <sub>3</sub> <sup>-</sup>  | C <sub>1</sub>  | B3LYP | UFF     | -624.64482 | 12.81 (0) | 3.46 | 69.17 | -59.68  |
| H <sub>2</sub> SO <sub>3</sub> | C <sub>s</sub>  | B3LYP | UFF     | -625.17435 | 20.07 (0) | 3.72 | 70.97 | -4.27   |
| SO <sub>3</sub> <sup>2-</sup>  | C <sub>3v</sub> | B3LYP | UAKS    | -623.89243 | 5.80 (0)  | 2.95 | 63.78 | -224.11 |
| HSO <sub>3</sub> <sup>-</sup>  | C <sub>1</sub>  | B3LYP | UAKS    | -624.64482 | 12.81 (0) | 3.46 | 69.15 | -56.26  |
| H <sub>2</sub> SO <sub>3</sub> | C <sub>s</sub>  | B3LYP | UAKS    | -625.17435 | 20.07 (0) | 3.72 | 70.97 | -3.80   |
| SO <sub>3</sub> <sup>2-</sup>  | C <sub>3v</sub> | B3LYP | Pauling | -623.89243 | 5.80 (0)  | 2.95 | 63.78 | -246.74 |
| HSO <sub>3</sub> <sup>-</sup>  | C <sub>1</sub>  | B3LYP | Pauling | -624.64482 | 12.81 (0) | 3.46 | 69.17 | -68.20  |
| H <sub>2</sub> SO <sub>3</sub> | C <sub>s</sub>  | B3LYP | Pauling | -625.17435 | 20.07 (0) | 3.72 | 70.97 | -12.91  |
| SO <sub>3</sub> <sup>2-</sup>  | C <sub>3v</sub> | B3LYP | Klamt   | -623.89243 | 5.80 (0)  | 2.95 | 63.78 | -232.65 |
| HSO <sub>3</sub> <sup>-</sup>  | C <sub>1</sub>  | B3LYP | Klamt   | -624.64482 | 12.81 (0) | 3.46 | 69.16 | -60.74  |
| H <sub>2</sub> SO <sub>3</sub> | C <sub>s</sub>  | B3LYP | Klamt   | -625.17435 | 20.07 (0) | 3.72 | 70.97 | -6.18   |
| SO <sub>3</sub> <sup>2-</sup>  | C <sub>3v</sub> | B3LYP | SMD     | -623.89243 | 5.80 (0)  | 2.95 | 63.78 | -238.03 |
| HSO <sub>3</sub> <sup>-</sup>  | C <sub>1</sub>  | B3LYP | SMD     | -624.64482 | 12.81 (0) | 3.46 | 69.16 | -65.49  |
| H <sub>2</sub> SO <sub>3</sub> | C <sub>s</sub>  | B3LYP | SMD     | -625.17435 | 20.07 (0) | 3.72 | 70.97 | -9.83   |
| SO <sub>3</sub> <sup>2-</sup>  | C <sub>3v</sub> | PBE   | UFF     | -623.49623 | 5.48 (0)  | 3.02 | 64.21 | -228.12 |
| HSO <sub>3</sub> <sup>-</sup>  | C <sub>1</sub>  | PBE   | UFF     | -624.24488 | 12.28 (0) | 3.53 | 69.63 | -58.50  |
| H <sub>2</sub> SO <sub>3</sub> | C <sub>s</sub>  | PBE   | UFF     | -624.77117 | 19.30 (0) | 3.82 | 71.77 | -3.67   |
| SO <sub>3</sub> <sup>2-</sup>  | C <sub>3v</sub> | PBE   | UAKS    | -623.49623 | 5.48 (0)  | 3.02 | 64.21 | -221.46 |
| HSO <sub>3</sub> <sup>-</sup>  | C <sub>1</sub>  | PBE   | UAKS    | -624.24488 | 12.28 (0) | 3.53 | 69.65 | -55.37  |
| H <sub>2</sub> SO <sub>3</sub> | C <sub>s</sub>  | PBE   | UAKS    | -624.77117 | 19.30 (0) | 3.82 | 71.77 | -3.24   |
| SO <sub>3</sub> <sup>2-</sup>  | C <sub>3v</sub> | PBE   | Pauling | -623.49623 | 5.48 (0)  | 3.02 | 64.21 | -242.13 |
| HSO <sub>3</sub> <sup>-</sup>  | C <sub>1</sub>  | PBE   | Pauling | -624.24488 | 12.29 (0) | 3.53 | 69.63 | -65.77  |
| H <sub>2</sub> SO <sub>3</sub> | C <sub>s</sub>  | PBE   | Pauling | -624.77117 | 19.30 (0) | 3.82 | 71.77 | -11.57  |
| SO <sub>3</sub> <sup>2-</sup>  | C <sub>3v</sub> | PBE   | Klamt   | -623.49624 | 5.48 (0)  | 3.02 | 64.21 | -229.40 |

|                                |                 |       |         |            |          |      |       |         |
|--------------------------------|-----------------|-------|---------|------------|----------|------|-------|---------|
| HSO <sub>3</sub> <sup>-</sup>  | C <sub>1</sub>  | PBE   | Klamt   | -624.24488 | 12.29(0) | 3.53 | 69.63 | -59.52  |
| H <sub>2</sub> SO <sub>3</sub> | C <sub>s</sub>  | PBE   | Klamt   | -624.77117 | 19.30(0) | 3.82 | 71.77 | -5.48   |
| SO <sub>3</sub> <sup>2-</sup>  | C <sub>3v</sub> | PBE   | SMD     | -623.49624 | 5.48(0)  | 3.02 | 64.21 | -234.21 |
| HSO <sub>3</sub> <sup>-</sup>  | C <sub>1</sub>  | PBE   | SMD     | -624.24488 | 12.29(0) | 3.53 | 69.63 | -63.78  |
| H <sub>2</sub> SO <sub>3</sub> | C <sub>s</sub>  | PBE   | SMD     | -624.77117 | 19.30(0) | 3.82 | 71.77 | -9.02   |
| SO <sub>3</sub> <sup>2-</sup>  | C <sub>3v</sub> | BVP86 | UFF     | -623.95859 | 5.45(0)  | 3.03 | 64.24 | -229.12 |
| HSO <sub>3</sub> <sup>-</sup>  | C <sub>1</sub>  | BVP86 | UFF     | -624.70848 | 12.23(0) | 3.54 | 69.72 | -58.84  |
| H <sub>2</sub> SO <sub>3</sub> | C <sub>s</sub>  | BVP86 | UFF     | -625.23572 | 19.24(0) | 3.83 | 71.84 | -3.72   |
| SO <sub>3</sub> <sup>2-</sup>  | C <sub>3v</sub> | BVP86 | UAKS    | -623.95859 | 5.45(0)  | 3.03 | 64.24 | -222.26 |
| HSO <sub>3</sub> <sup>-</sup>  | C <sub>1</sub>  | BVP86 | UAKS    | -624.70848 | 12.25(0) | 3.53 | 69.62 | -55.54  |
| H <sub>2</sub> SO <sub>3</sub> | C <sub>s</sub>  | BVP86 | UAKS    | -625.23572 | 19.24(0) | 3.83 | 71.84 | -3.24   |
| SO <sub>3</sub> <sup>2-</sup>  | C <sub>3v</sub> | BVP86 | Pauling | -623.95859 | 5.45(0)  | 3.03 | 64.24 | -243.53 |
| HSO <sub>3</sub> <sup>-</sup>  | C <sub>1</sub>  | BVP86 | Pauling | -624.70848 | 12.23(0) | 3.55 | 69.76 | -66.37  |
| H <sub>2</sub> SO <sub>3</sub> | C <sub>s</sub>  | BVP86 | Pauling | -625.23572 | 19.24(0) | 3.83 | 71.84 | -11.71  |
| SO <sub>3</sub> <sup>2-</sup>  | C <sub>3v</sub> | BVP86 | Klmat   | -623.95859 | 5.45(0)  | 3.03 | 64.24 | -230.44 |
| HSO <sub>3</sub> <sup>-</sup>  | C <sub>1</sub>  | BVP86 | Klamt   | -624.70848 | 12.23(0) | 3.55 | 69.77 | -59.82  |
| H <sub>2</sub> SO <sub>3</sub> | C <sub>s</sub>  | BVP86 | Klmat   | -625.23572 | 19.24(0) | 3.83 | 71.84 | -5.52   |
| SO <sub>3</sub> <sup>2-</sup>  | C <sub>3v</sub> | BVP86 | SMD     | -623.95859 | 5.45(0)  | 3.03 | 64.24 | -235.37 |
| HSO <sub>3</sub> <sup>-</sup>  | C <sub>1</sub>  | BVP86 | SMD     | -624.70848 | 12.23(0) | 3.55 | 69.77 | -63.22  |
| H <sub>2</sub> SO <sub>3</sub> | C <sub>s</sub>  | BVP86 | SMD     | -625.23572 | 19.24(0) | 3.83 | 71.84 | -9.10   |
| SO <sub>3</sub> <sup>2-</sup>  | C <sub>3v</sub> | M052X | UFF     | -623.84443 | 6.17(0)  | 2.89 | 63.43 | -235.74 |
| HSO <sub>3</sub> <sup>-</sup>  | C <sub>1</sub>  | M052X | UFF     | -624.59720 | 13.34(0) | 3.34 | 68.34 | -61.76  |
| H <sub>2</sub> SO <sub>3</sub> | C <sub>s</sub>  | M052X | UFF     | -625.12652 | 20.61(0) | 3.63 | 70.27 | -4.99   |
| SO <sub>3</sub> <sup>2-</sup>  | C <sub>3v</sub> | M052X | UAKS    | -623.84443 | 6.17(0)  | 2.89 | 63.43 | -227.79 |
| HSO <sub>3</sub> <sup>-</sup>  | C <sub>1</sub>  | M052X | UAKS    | -624.59719 | 13.35(0) | 3.33 | 68.28 | -57.67  |
| H <sub>2</sub> SO <sub>3</sub> | C <sub>s</sub>  | M052X | UAKS    | -625.12652 | 20.61(0) | 3.63 | 70.27 | -4.23   |
| SO <sub>3</sub> <sup>2-</sup>  | C <sub>3v</sub> | M052X | Pauling | -623.84443 | 6.17(0)  | 2.89 | 63.43 | -253.21 |
| HSO <sub>3</sub> <sup>-</sup>  | C <sub>1</sub>  | M052X | Pauling | -624.59719 | 13.31(0) | 3.35 | 68.46 | -71.15  |
| H <sub>2</sub> SO <sub>3</sub> | C <sub>s</sub>  | M052X | Pauling | -625.12652 | 20.61(0) | 3.63 | 70.27 | -13.75  |
| SO <sub>3</sub> <sup>2-</sup>  | C <sub>3v</sub> | M052X | Klamt   | -623.84443 | 6.17(0)  | 2.89 | 63.43 | -237.30 |
| HSO <sub>3</sub> <sup>-</sup>  | C <sub>1</sub>  | M052X | Klamt   | -624.59719 | 13.29(0) | 3.37 | 68.65 | -62.96  |
| H <sub>2</sub> SO <sub>3</sub> | C <sub>s</sub>  | M052X | Klamt   | -625.12652 | 20.61(0) | 3.63 | 70.27 | -6.91   |
| SO <sub>3</sub> <sup>2-</sup>  | C <sub>3v</sub> | M052X | SMD     | -623.84443 | 6.17(0)  | 2.89 | 63.43 | -242.98 |
| HSO <sub>3</sub> <sup>-</sup>  | C <sub>1</sub>  | M052X | SMD     | -624.59719 | 13.29(0) | 3.37 | 68.65 | -67.58  |
| H <sub>2</sub> SO <sub>3</sub> | C <sub>s</sub>  | M052X | SMD     | -625.12652 | 20.61(0) | 3.63 | 70.27 | -10.55  |
| SO <sub>4</sub> <sup>2-</sup>  | T <sub>d</sub>  | B3LYP | UFF     | -699.18733 | 9.25(0)  | 3.18 | 63.72 | -225.59 |
| HSO <sub>4</sub> <sup>-</sup>  | C <sub>s</sub>  | B3LYP | UFF     | -699.91122 | 16.52(0) | 3.78 | 73.59 | -59.49  |
| H <sub>2</sub> SO <sub>4</sub> | C <sub>2</sub>  | B3LYP | UFF     | -700.41831 | 24.17(0) | 3.89 | 71.40 | -5.93   |
| SO <sub>4</sub> <sup>2-</sup>  | T <sub>d</sub>  | B3LYP | UAKS    | -699.18733 | 9.25(0)  | 3.18 | 63.72 | -233.95 |
| HSO <sub>4</sub> <sup>-</sup>  | C <sub>s</sub>  | B3LYP | UAKS    | -699.91122 | 16.52(0) | 3.78 | 73.59 | -66.76  |
| H <sub>2</sub> SO <sub>4</sub> | C <sub>2</sub>  | B3LYP | UAKS    | -700.41831 | 24.17(0) | 3.89 | 71.40 | -15.76  |
| SO <sub>4</sub> <sup>2-</sup>  | T <sub>d</sub>  | B3LYP | Pauling | -699.18733 | 9.25(0)  | 3.18 | 63.72 | -241.52 |
| HSO <sub>4</sub> <sup>-</sup>  | C <sub>s</sub>  | B3LYP | Pauling | -699.91122 | 16.52(0) | 3.78 | 73.59 | -68.38  |
| H <sub>2</sub> SO <sub>4</sub> | C <sub>2</sub>  | B3LYP | Pauling | -700.41831 | 24.17(0) | 3.89 | 71.40 | -16.09  |
| SO <sub>4</sub> <sup>2-</sup>  | T <sub>d</sub>  | B3LYP | Klamt   | -699.18733 | 9.25(0)  | 3.18 | 63.72 | -227.73 |
| HSO <sub>4</sub> <sup>-</sup>  | C <sub>s</sub>  | B3LYP | Klamt   | -699.91122 | 16.52(0) | 3.78 | 73.59 | -61.28  |
| H <sub>2</sub> SO <sub>4</sub> | C <sub>2</sub>  | B3LYP | Klamt   | -700.41832 | 24.17(0) | 3.89 | 71.41 | -8.93   |

|                                |                |       |         |            |           |      |       |         |
|--------------------------------|----------------|-------|---------|------------|-----------|------|-------|---------|
| SO <sub>4</sub> <sup>2-</sup>  | T <sub>d</sub> | B3LYP | SMD     | -699.18733 | 9.25 (0)  | 3.18 | 63.72 | -234.08 |
| HSO <sub>4</sub> <sup>-</sup>  | C <sub>s</sub> | B3LYP | SMD     | -699.91122 | 16.52 (0) | 3.78 | 73.59 | -65.92  |
| H <sub>2</sub> SO <sub>4</sub> | C <sub>2</sub> | B3LYP | SMD     | -700.41832 | 24.17 (0) | 3.89 | 71.41 | -12.76  |
| SO <sub>4</sub> <sup>2-</sup>  | T <sub>d</sub> | PBE   | UFF     | -698.71636 | 8.80 (0)  | 3.27 | 64.23 | -223.72 |
| HSO <sub>4</sub> <sup>-</sup>  | C <sub>1</sub> | PBE   | UFF     | -699.43954 | 15.76 (0) | 3.95 | 77.85 | -58.03  |
| H <sub>2</sub> SO <sub>4</sub> | C <sub>1</sub> | PBE   | UFF     | -699.94622 | 23.28 (0) | 4.00 | 72.06 | -5.11   |
| SO <sub>4</sub> <sup>2-</sup>  | T <sub>d</sub> | PBE   | UAKS    | -698.71636 | 8.80 (0)  | 3.27 | 64.23 | -231.80 |
| HSO <sub>4</sub> <sup>-</sup>  | C <sub>1</sub> | PBE   | UAKS    | -699.43954 | 15.76 (0) | 3.95 | 77.85 | -65.44  |
| H <sub>2</sub> SO <sub>4</sub> | C <sub>1</sub> | PBE   | UAKS    | -699.94622 | 23.28 (0) | 4.00 | 72.06 | -14.78  |
| SO <sub>4</sub> <sup>2-</sup>  | T <sub>d</sub> | PBE   | Pauling | -698.71636 | 8.80 (0)  | 3.27 | 64.23 | -238.49 |
| HSO <sub>4</sub> <sup>-</sup>  | C <sub>1</sub> | PBE   | Pauling | -699.43954 | 15.76 (0) | 3.95 | 77.85 | -66.61  |
| H <sub>2</sub> SO <sub>4</sub> | C <sub>1</sub> | PBE   | Pauling | -699.94622 | 23.28 (0) | 4.00 | 72.06 | -14.94  |
| SO <sub>4</sub> <sup>2-</sup>  | T <sub>d</sub> | PBE   | Klamt   | -698.71636 | 8.79 (0)  | 3.27 | 64.24 | -225.75 |
| HSO <sub>4</sub> <sup>-</sup>  | C <sub>1</sub> | PBE   | Klamt   | -699.43954 | 15.76 (0) | 3.95 | 77.78 | -59.74  |
| H <sub>2</sub> SO <sub>4</sub> | C <sub>1</sub> | PBE   | Klamt   | -699.94622 | 23.28 (0) | 4.00 | 72.06 | -8.01   |
| SO <sub>4</sub> <sup>2-</sup>  | T <sub>d</sub> | PBE   | SMD     | -698.71636 | 8.79 (0)  | 3.27 | 64.24 | -231.56 |
| HSO <sub>4</sub> <sup>-</sup>  | C <sub>1</sub> | PBE   | SMD     | -699.43954 | 15.76 (0) | 3.95 | 77.78 | -64.31  |
| H <sub>2</sub> SO <sub>4</sub> | C <sub>1</sub> | PBE   | SMD     | -699.94622 | 23.28 (0) | 4.00 | 72.06 | -11.63  |
| SO <sub>4</sub> <sup>2-</sup>  | T <sub>d</sub> | BVP86 | UFF     | -699.25677 | 8.77 (0)  | 3.27 | 64.25 | -224.50 |
| HSO <sub>4</sub> <sup>-</sup>  | C <sub>1</sub> | BVP86 | UFF     | -699.98084 | 15.72 (0) | 3.95 | 77.40 | -58.30  |
| H <sub>2</sub> SO <sub>4</sub> | C <sub>1</sub> | BVP86 | UFF     | -700.48822 | 23.23 (0) | 4.00 | 72.09 | -5.15   |
| SO <sub>4</sub> <sup>2-</sup>  | T <sub>d</sub> | BVP86 | UAKS    | -699.25677 | 8.77 (0)  | 3.27 | 64.25 | -232.67 |
| HSO <sub>4</sub> <sup>-</sup>  | C <sub>1</sub> | BVP86 | UAKS    | -699.98084 | 15.72 (0) | 3.95 | 77.40 | -65.69  |
| H <sub>2</sub> SO <sub>4</sub> | C <sub>1</sub> | BVP86 | UAKS    | -700.48822 | 23.23 (0) | 4.00 | 72.09 | -14.81  |
| SO <sub>4</sub> <sup>2-</sup>  | T <sub>d</sub> | BVP86 | Pauling | -699.25677 | 8.77 (0)  | 3.27 | 64.25 | -239.65 |
| HSO <sub>4</sub> <sup>-</sup>  | C <sub>1</sub> | BVP86 | Pauling | -699.98084 | 15.72 (0) | 3.95 | 77.40 | -67.11  |
| H <sub>2</sub> SO <sub>4</sub> | C <sub>1</sub> | BVP86 | Pauling | -700.48822 | 23.23 (0) | 4.00 | 72.09 | -15.06  |
| SO <sub>4</sub> <sup>2-</sup>  | T <sub>d</sub> | BVP86 | Klamt   | -699.25677 | 8.76 (0)  | 3.27 | 64.25 | -226.55 |
| HSO <sub>4</sub> <sup>-</sup>  | C <sub>1</sub> | BVP86 | Klamt   | -699.98084 | 15.72 (0) | 3.95 | 77.39 | -60.07  |
| H <sub>2</sub> SO <sub>4</sub> | C <sub>1</sub> | BVP86 | Klamt   | -700.48822 | 23.23 (0) | 4.00 | 72.09 | -8.05   |
| SO <sub>4</sub> <sup>2-</sup>  | T <sub>d</sub> | BVP86 | SMD     | -699.25677 | 8.76 (0)  | 3.27 | 64.25 | -232.51 |
| HSO <sub>4</sub> <sup>-</sup>  | C <sub>1</sub> | BVP86 | SMD     | -699.98084 | 15.72 (0) | 3.95 | 77.39 | -64.66  |
| H <sub>2</sub> SO <sub>4</sub> | C <sub>1</sub> | BVP86 | SMD     | -700.48822 | 23.23 (0) | 4.00 | 72.09 | -11.70  |
| SO <sub>4</sub> <sup>2-</sup>  | T <sub>d</sub> | M052X | UFF     | -699.14473 | 9.74 (0)  | 3.11 | 63.33 | -228.41 |
| HSO <sub>4</sub> <sup>-</sup>  | C <sub>s</sub> | M052X | UFF     | -699.86492 | 17.06 (0) | 3.71 | 73.59 | -61.04  |
| H <sub>2</sub> SO <sub>4</sub> | C <sub>2</sub> | M052X | UFF     | -700.36830 | 24.71 (0) | 3.83 | 71.02 | -6.91   |
| SO <sub>4</sub> <sup>2-</sup>  | T <sub>d</sub> | M052X | UAKS    | -699.14473 | 9.74 (0)  | 3.11 | 63.33 | -237.07 |
| HSO <sub>4</sub> <sup>-</sup>  | C <sub>s</sub> | M052X | UAKS    | -699.86492 | 17.07 (0) | 3.70 | 73.25 | -68.51  |
| H <sub>2</sub> SO <sub>4</sub> | C <sub>2</sub> | M052X | UAKS    | -700.36830 | 24.71 (0) | 3.83 | 71.02 | -16.92  |
| SO <sub>4</sub> <sup>2-</sup>  | T <sub>d</sub> | M052X | Pauling | -699.14473 | 9.74 (0)  | 3.11 | 63.33 | -245.88 |
| HSO <sub>4</sub> <sup>-</sup>  | C <sub>s</sub> | M052X | Pauling | -699.86492 | 17.07 (0) | 3.70 | 73.25 | -70.95  |
| H <sub>2</sub> SO <sub>4</sub> | C <sub>2</sub> | M052X | Pauling | -700.36830 | 24.71 (0) | 3.83 | 71.02 | -17.70  |
| SO <sub>4</sub> <sup>2-</sup>  | T <sub>d</sub> | M052X | Klamt   | -699.14473 | 9.74 (0)  | 3.11 | 63.33 | -230.67 |
| HSO <sub>4</sub> <sup>-</sup>  | C <sub>s</sub> | M052X | Klamt   | -699.86492 | 17.07 (0) | 3.70 | 73.25 | -62.95  |
| H <sub>2</sub> SO <sub>4</sub> | C <sub>2</sub> | M052X | Klamt   | -700.36830 | 24.70 (0) | 3.83 | 71.02 | -10.00  |
| SO <sub>4</sub> <sup>2-</sup>  | T <sub>d</sub> | M052X | SMD     | -699.14473 | 9.74 (0)  | 3.11 | 63.33 | -237.17 |
| HSO <sub>4</sub> <sup>-</sup>  | C <sub>s</sub> | M052X | SMD     | -699.86492 | 17.07 (0) | 3.70 | 73.25 | -67.63  |

|                                              |                 |       |         |            |          |      |       |         |
|----------------------------------------------|-----------------|-------|---------|------------|----------|------|-------|---------|
| H <sub>2</sub> SO <sub>4</sub>               | C <sub>2</sub>  | M052X | SMD     | -700.36830 | 24.70(0) | 3.83 | 71.02 | -13.80  |
| C <sub>2</sub> O <sub>4</sub> <sup>2-</sup>  | D <sub>2d</sub> | B3LYP | UFF     | -377.24423 | 14.40(0) | 3.81 | 71.46 | -213.35 |
| HC <sub>2</sub> O <sub>4</sub> <sup>-</sup>  | C <sub>s</sub>  | B3LYP | UFF     | -377.95099 | 22.14(0) | 4.07 | 76.16 | -58.86  |
| H <sub>2</sub> C <sub>2</sub> O <sub>4</sub> | C <sub>2h</sub> | B3LYP | UFF     | -378.48315 | 30.58(0) | 4.11 | 76.95 | -5.58   |
| C <sub>2</sub> O <sub>4</sub> <sup>2-</sup>  | D <sub>2d</sub> | B3LYP | UAKS    | -377.24423 | 14.40(0) | 3.81 | 71.46 | -222.80 |
| HC <sub>2</sub> O <sub>4</sub> <sup>-</sup>  | C <sub>s</sub>  | B3LYP | UAKS    | -377.95099 | 22.14(0) | 4.07 | 76.16 | -66.67  |
| H <sub>2</sub> C <sub>2</sub> O <sub>4</sub> | C <sub>2h</sub> | B3LYP | UAKS    | -378.48315 | 30.58(0) | 4.11 | 76.95 | -13.98  |
| C <sub>2</sub> O <sub>4</sub> <sup>2-</sup>  | D <sub>2d</sub> | B3LYP | Pauling | -377.24423 | 14.40(0) | 3.81 | 71.46 | -228.01 |
| HC <sub>2</sub> O <sub>4</sub> <sup>-</sup>  | C <sub>s</sub>  | B3LYP | Pauling | -377.95099 | 22.14(0) | 4.07 | 76.16 | -69.93  |
| H <sub>2</sub> C <sub>2</sub> O <sub>4</sub> | C <sub>2h</sub> | B3LYP | Pauling | -378.48315 | 30.58(0) | 4.11 | 76.95 | -19.35  |
| C <sub>2</sub> O <sub>4</sub> <sup>2-</sup>  | D <sub>2d</sub> | B3LYP | Klamt   | -377.24423 | 14.40(0) | 3.81 | 71.46 | -214.92 |
| HC <sub>2</sub> O <sub>4</sub> <sup>-</sup>  | C <sub>s</sub>  | B3LYP | Klamt   | -377.95099 | 22.14(0) | 4.07 | 76.16 | -60.52  |
| H <sub>2</sub> C <sub>2</sub> O <sub>4</sub> | C <sub>2h</sub> | B3LYP | Klamt   | -378.48315 | 30.58(0) | 4.11 | 76.95 | -7.51   |
| C <sub>2</sub> O <sub>4</sub> <sup>2-</sup>  | D <sub>2d</sub> | B3LYP | SMD     | -377.24423 | 14.40(0) | 3.81 | 71.46 | -221.86 |
| HC <sub>2</sub> O <sub>4</sub> <sup>-</sup>  | C <sub>s</sub>  | B3LYP | SMD     | -377.95099 | 22.14(0) | 4.07 | 76.16 | -64.28  |
| H <sub>2</sub> C <sub>2</sub> O <sub>4</sub> | C <sub>2h</sub> | B3LYP | SMD     | -378.48315 | 30.58(0) | 4.11 | 76.95 | -11.00  |
| C <sub>2</sub> O <sub>4</sub> <sup>2-</sup>  | D <sub>2d</sub> | PBE   | UFF     | -376.86088 | 13.77(0) | 3.88 | 71.92 | -211.00 |
| HC <sub>2</sub> O <sub>4</sub> <sup>-</sup>  | C <sub>s</sub>  | PBE   | UFF     | -377.56577 | 21.26(0) | 4.14 | 76.57 | -57.59  |
| H <sub>2</sub> C <sub>2</sub> O <sub>4</sub> | C <sub>2h</sub> | PBE   | UFF     | -378.09449 | 29.57(0) | 4.18 | 77.43 | -4.73   |
| C <sub>2</sub> O <sub>4</sub> <sup>2-</sup>  | D <sub>2d</sub> | PBE   | UAKS    | -376.86088 | 13.77(0) | 3.88 | 71.92 | -219.99 |
| HC <sub>2</sub> O <sub>4</sub> <sup>-</sup>  | C <sub>s</sub>  | PBE   | UAKS    | -377.56577 | 21.26(0) | 4.14 | 76.57 | -65.12  |
| H <sub>2</sub> C <sub>2</sub> O <sub>4</sub> | C <sub>2h</sub> | PBE   | UAKS    | -378.09449 | 29.57(0) | 4.18 | 77.37 | -13.79  |
| C <sub>2</sub> O <sub>4</sub> <sup>2-</sup>  | D <sub>2d</sub> | PBE   | Pauling | -376.86088 | 13.77(0) | 3.88 | 71.92 | -224.24 |
| HC <sub>2</sub> O <sub>4</sub> <sup>-</sup>  | C <sub>s</sub>  | PBE   | Pauling | -377.56577 | 21.26(0) | 4.14 | 76.57 | -67.02  |
| H <sub>2</sub> C <sub>2</sub> O <sub>4</sub> | C <sub>2h</sub> | PBE   | Pauling | -378.09449 | 29.57(0) | 4.18 | 77.43 | -17.15  |
| C <sub>2</sub> O <sub>4</sub> <sup>2-</sup>  | D <sub>2d</sub> | PBE   | Klamt   | -376.86088 | 13.77(0) | 3.88 | 71.92 | -212.45 |
| HC <sub>2</sub> O <sub>4</sub> <sup>-</sup>  | C <sub>s</sub>  | PBE   | Klamt   | -377.56577 | 21.26(0) | 4.14 | 76.56 | -59.21  |
| H <sub>2</sub> C <sub>2</sub> O <sub>4</sub> | C <sub>2h</sub> | PBE   | Klamt   | -378.09449 | 29.57(0) | 4.18 | 77.44 | -7.11   |
| C <sub>2</sub> O <sub>4</sub> <sup>2-</sup>  | D <sub>2d</sub> | PBE   | SMD     | -376.86088 | 13.77(0) | 3.88 | 71.92 | -218.99 |
| HC <sub>2</sub> O <sub>4</sub> <sup>-</sup>  | C <sub>s</sub>  | PBE   | SMD     | -377.56577 | 21.26(0) | 4.14 | 76.56 | -62.41  |
| H <sub>2</sub> C <sub>2</sub> O <sub>4</sub> | C <sub>2h</sub> | PBE   | SMD     | -378.09449 | 29.57(0) | 4.18 | 77.44 | -10.03  |
| C <sub>2</sub> O <sub>4</sub> <sup>2-</sup>  | D <sub>2d</sub> | BVP86 | UFF     | -377.28170 | 13.74(0) | 3.88 | 71.87 | -211.94 |
| HC <sub>2</sub> O <sub>4</sub> <sup>-</sup>  | C <sub>s</sub>  | BVP86 | UFF     | -377.98765 | 21.21(0) | 4.14 | 76.56 | -57.92  |
| H <sub>2</sub> C <sub>2</sub> O <sub>4</sub> | C <sub>2h</sub> | BVP86 | UFF     | -378.51710 | 29.49(0) | 4.19 | 78.50 | -4.79   |
| C <sub>2</sub> O <sub>4</sub> <sup>2-</sup>  | D <sub>2d</sub> | BVP86 | UAKS    | -377.28170 | 13.74(0) | 3.88 | 71.87 | -221.08 |
| HC <sub>2</sub> O <sub>4</sub> <sup>-</sup>  | C <sub>s</sub>  | BVP86 | UAKS    | -377.98765 | 21.21(0) | 4.14 | 76.56 | -65.48  |
| H <sub>2</sub> C <sub>2</sub> O <sub>4</sub> | C <sub>2h</sub> | BVP86 | UAKS    | -378.51710 | 29.49(0) | 4.19 | 78.50 | -13.82  |
| C <sub>2</sub> O <sub>4</sub> <sup>2-</sup>  | D <sub>2d</sub> | BVP86 | Pauling | -377.28170 | 13.74(0) | 3.88 | 71.87 | -225.61 |
| HC <sub>2</sub> O <sub>4</sub> <sup>-</sup>  | C <sub>s</sub>  | BVP86 | Pauling | -377.98765 | 21.21(0) | 4.14 | 76.56 | -67.60  |
| H <sub>2</sub> C <sub>2</sub> O <sub>4</sub> | C <sub>2h</sub> | BVP86 | Pauling | -378.51710 | 29.49(0) | 4.19 | 78.50 | -17.34  |
| C <sub>2</sub> O <sub>4</sub> <sup>2-</sup>  | D <sub>2d</sub> | BVP86 | Klamt   | -377.28170 | 13.74(0) | 3.88 | 71.88 | -213.43 |
| HC <sub>2</sub> O <sub>4</sub> <sup>-</sup>  | C <sub>s</sub>  | BVP86 | Klamt   | -377.98765 | 21.21(0) | 4.14 | 76.56 | -59.37  |
| H <sub>2</sub> C <sub>2</sub> O <sub>4</sub> | C <sub>2h</sub> | BVP86 | Klamt   | -378.51710 | 29.49(0) | 4.19 | 78.50 | -7.18   |
| C <sub>2</sub> O <sub>4</sub> <sup>2-</sup>  | D <sub>2d</sub> | BVP86 | SMD     | -377.28170 | 13.74(0) | 3.88 | 71.88 | -220.20 |
| HC <sub>2</sub> O <sub>4</sub> <sup>-</sup>  | C <sub>s</sub>  | BVP86 | SMD     | -377.98765 | 21.21(0) | 4.14 | 76.56 | -62.83  |
| H <sub>2</sub> C <sub>2</sub> O <sub>4</sub> | C <sub>2h</sub> | BVP86 | SMD     | -378.51710 | 29.49(0) | 4.19 | 78.50 | -10.26  |

|                  |          |       |         |            |          |      |       |         |
|------------------|----------|-------|---------|------------|----------|------|-------|---------|
| $C_2O_4^{2-}$    | $D_{2d}$ | M052X | UFF     | -377.20607 | 14.97(0) | 3.78 | 71.35 | -216.45 |
| $HC_2O_4^-$      | $C_s$    | M052X | UFF     | -377.91051 | 22.78(0) | 4.05 | 76.38 | -60.57  |
| $H_2C_2O_4$      | $C_{2h}$ | M052X | UFF     | -378.44201 | 31.24(0) | 4.06 | 75.55 | -6.04   |
| $C_2O_4^{2-}$    | $D_{2d}$ | M052X | UAKS    | -377.20607 | 14.97(0) | 3.78 | 71.35 | -226.33 |
| $HC_2O_4^-$      | $C_s$    | M052X | UAKS    | -377.91051 | 22.78(0) | 4.05 | 76.38 | -68.60  |
| $H_2C_2O_4$      | $C_{2h}$ | M052X | UAKS    | -378.44201 | 31.24(0) | 4.06 | 75.55 | -14.99  |
| $C_2O_4^{2-}$    | $D_{2d}$ | M052X | Pauling | -377.20607 | 14.97(0) | 3.78 | 71.35 | -232.72 |
| $HC_2O_4^-$      | $C_s$    | M052X | Pauling | -377.91051 | 22.78(0) | 4.05 | 76.38 | -72.34  |
| $H_2C_2O_4$      | $C_{2h}$ | M052X | Pauling | -378.44201 | 31.24(0) | 4.06 | 75.55 | -20.54  |
| $C_2O_4^{2-}$    | $D_{2d}$ | M052X | Klamt   | -377.20607 | 14.97(0) | 3.78 | 71.35 | -218.09 |
| $HC_2O_4^-$      | $C_s$    | M052X | Klamt   | -377.91051 | 22.78(0) | 4.05 | 76.38 | -62.34  |
| $H_2C_2O_4$      | $C_{2h}$ | M052X | Klamt   | -378.44201 | 31.24(0) | 4.06 | 75.55 | -8.49   |
| $C_2O_4^{2-}$    | $D_{2d}$ | M052X | SMD     | -377.20607 | 14.97(0) | 3.78 | 71.35 | -225.79 |
| $HC_2O_4^-$      | $C_s$    | M052X | SMD     | -377.91051 | 22.78(0) | 4.05 | 76.38 | -66.25  |
| $H_2C_2O_4$      | $C_{2h}$ | M052X | SMD     | -378.44201 | 31.24(0) | 4.06 | 75.55 | -11.99  |
| $C_3H_2O_4^{2-}$ | $C_s$    | B3LYP | UFF     | -416.58947 | 31.72(0) | 4.70 | 85.68 | -200.81 |
| $HC_3H_2O_4^-$   | $C_1$    | B3LYP | UFF     | -417.30938 | 39.14(0) | 4.52 | 81.77 | -51.76  |
| $H_2C_3H_2O_4$   | $C_1$    | B3LYP | UFF     | -417.82894 | 48.53(0) | 4.79 | 84.09 | -6.01   |
| $C_3H_2O_4^{2-}$ | $C_s$    | B3LYP | UAKS    | -416.58947 | 31.72(0) | 4.70 | 85.68 | -212.69 |
| $HC_3H_2O_4^-$   | $C_1$    | B3LYP | UAKS    | -417.30938 | 39.14(0) | 4.52 | 81.77 | -57.38  |
| $H_2C_3H_2O_4$   | $C_1$    | B3LYP | UAKS    | -417.82894 | 48.53(0) | 4.79 | 84.09 | -14.34  |
| $C_3H_2O_4^{2-}$ | $C_s$    | B3LYP | Pauling | -416.58947 | 31.72(0) | 4.70 | 85.68 | -217.24 |
| $HC_3H_2O_4^-$   | $C_1$    | B3LYP | Pauling | -417.30938 | 39.14(0) | 4.52 | 81.77 | -63.02  |
| $H_2C_3H_2O_4$   | $C_1$    | B3LYP | Pauling | -417.82894 | 48.53(0) | 4.79 | 84.09 | -19.40  |
| $C_3H_2O_4^{2-}$ | $C_s$    | B3LYP | Klamt   | -416.58947 | 31.72(0) | 4.70 | 85.68 | -202.87 |
| $HC_3H_2O_4^-$   | $C_1$    | B3LYP | Klamt   | -417.30938 | 39.14(0) | 4.52 | 81.77 | -53.73  |
| $H_2C_3H_2O_4$   | $C_1$    | B3LYP | Klamt   | -417.82894 | 48.52(0) | 4.79 | 84.09 | -8.68   |
| $C_3H_2O_4^{2-}$ | $C_s$    | B3LYP | SMD     | -416.58947 | 31.72(0) | 4.70 | 85.68 | -211.68 |
| $HC_3H_2O_4^-$   | $C_1$    | B3LYP | SMD     | -417.30938 | 39.14(0) | 4.52 | 81.77 | -56.74  |
| $H_2C_3H_2O_4$   | $C_1$    | B3LYP | SMD     | -417.82894 | 48.52(0) | 4.79 | 84.09 | -12.36  |
| $C_3H_2O_4^{2-}$ | $C_s$    | PBE   | UFF     | -416.14727 | 30.59(0) | 4.77 | 84.77 | -198.33 |
| $HC_3H_2O_4^-$   | $C_1$    | PBE   | UFF     | -416.86818 | 37.11(0) | 4.64 | 82.21 | -50.61  |
| $H_2C_3H_2O_4$   | $C_1$    | PBE   | UFF     | -417.38260 | 47.00(0) | 4.82 | 83.18 | -5.09   |
| $C_3H_2O_4^{2-}$ | $C_s$    | PBE   | UAKS    | -416.14727 | 30.59(0) | 4.77 | 84.77 | -209.80 |
| $HC_3H_2O_4^-$   | $C_1$    | PBE   | UAKS    | -416.86818 | 37.11(0) | 4.64 | 82.21 | -56.20  |
| $H_2C_3H_2O_4$   | $C_1$    | PBE   | UAKS    | -417.38260 | 47.00(0) | 4.82 | 83.18 | -14.29  |
| $C_3H_2O_4^{2-}$ | $C_s$    | PBE   | Pauling | -416.14727 | 30.59(0) | 4.77 | 84.77 | -213.25 |
| $HC_3H_2O_4^-$   | $C_1$    | PBE   | Pauling | -416.86818 | 37.11(0) | 4.64 | 82.21 | -59.88  |
| $H_2C_3H_2O_4$   | $C_1$    | PBE   | Pauling | -417.38260 | 47.00(0) | 4.82 | 83.18 | -17.05  |
| $C_3H_2O_4^{2-}$ | $C_s$    | PBE   | Klamt   | -416.14727 | 30.59(0) | 4.77 | 84.77 | -200.30 |
| $HC_3H_2O_4^-$   | $C_1$    | PBE   | Klamt   | -416.86818 | 37.11(0) | 4.64 | 82.21 | -52.27  |
| $H_2C_3H_2O_4$   | $C_1$    | PBE   | Klamt   | -417.38259 | 46.99(0) | 4.82 | 83.20 | -7.73   |
| $C_3H_2O_4^{2-}$ | $C_s$    | PBE   | SMD     | -416.14727 | 30.59(0) | 4.77 | 84.77 | -208.63 |
| $HC_3H_2O_4^-$   | $C_1$    | PBE   | SMD     | -416.86818 | 37.11(0) | 4.64 | 82.21 | -54.76  |
| $H_2C_3H_2O_4$   | $C_1$    | PBE   | SMD     | -417.38259 | 46.99(0) | 4.82 | 83.20 | -11.22  |
| $C_3H_2O_4^{2-}$ | $C_s$    | BVP86 | UFF     | -416.62523 | 30.54(0) | 4.78 | 85.11 | -199.18 |
| $HC_3H_2O_4^-$   | $C_1$    | BVP86 | UFF     | -417.34714 | 37.03(0) | 4.66 | 82.27 | -50.92  |

|                                                             |                 |       |         |            |           |      |       |         |
|-------------------------------------------------------------|-----------------|-------|---------|------------|-----------|------|-------|---------|
| H <sub>2</sub> C <sub>3</sub> H <sub>2</sub> O <sub>4</sub> | C <sub>1</sub>  | BVP86 | UFF     | -417.86235 | 46.94 (0) | 4.82 | 83.28 | -5.17   |
| C <sub>3</sub> H <sub>2</sub> O <sub>4</sub> <sup>2-</sup>  | C <sub>s</sub>  | BVP86 | UAKS    | -416.62523 | 30.54 (0) | 4.78 | 85.11 | -210.80 |
| HC <sub>3</sub> H <sub>2</sub> O <sub>4</sub> <sup>-</sup>  | C <sub>1</sub>  | BVP86 | UAKS    | -417.34714 | 37.03 (0) | 4.66 | 82.27 | -56.45  |
| H <sub>2</sub> C <sub>3</sub> H <sub>2</sub> O <sub>4</sub> | C <sub>1</sub>  | BVP86 | UAKS    | -417.86235 | 46.94 (0) | 4.82 | 83.28 | -14.30  |
| C <sub>3</sub> H <sub>2</sub> O <sub>4</sub> <sup>2-</sup>  | C <sub>s</sub>  | BVP86 | Pauling | -416.62523 | 30.54 (0) | 4.78 | 85.11 | -214.53 |
| HC <sub>3</sub> H <sub>2</sub> O <sub>4</sub> <sup>-</sup>  | C <sub>1</sub>  | BVP86 | Pauling | -417.34714 | 37.03 (0) | 4.66 | 82.27 | -60.48  |
| H <sub>2</sub> C <sub>3</sub> H <sub>2</sub> O <sub>4</sub> | C <sub>1</sub>  | BVP86 | Pauling | -417.86235 | 46.94 (0) | 4.82 | 83.28 | -17.27  |
| C <sub>3</sub> H <sub>2</sub> O <sub>4</sub> <sup>2-</sup>  | C <sub>s</sub>  | BVP86 | Klamt   | -416.62523 | 30.54 (0) | 4.78 | 85.04 | -201.18 |
| HC <sub>3</sub> H <sub>2</sub> O <sub>4</sub> <sup>-</sup>  | C <sub>1</sub>  | BVP86 | Klamt   | -417.34714 | 37.03 (0) | 4.66 | 82.27 | -52.60  |
| H <sub>2</sub> C <sub>3</sub> H <sub>2</sub> O <sub>4</sub> | C <sub>1</sub>  | BVP86 | Klamt   | -417.86235 | 46.94 (0) | 4.82 | 83.30 | -7.82   |
| C <sub>3</sub> H <sub>2</sub> O <sub>4</sub> <sup>2-</sup>  | C <sub>s</sub>  | BVP86 | SMD     | -416.62523 | 30.54 (0) | 4.78 | 85.04 | -209.72 |
| HC <sub>3</sub> H <sub>2</sub> O <sub>4</sub> <sup>-</sup>  | C <sub>1</sub>  | BVP86 | SMD     | -417.34714 | 37.03 (0) | 4.66 | 82.27 | -55.24  |
| H <sub>2</sub> C <sub>3</sub> H <sub>2</sub> O <sub>4</sub> | C <sub>1</sub>  | BVP86 | SMD     | -417.86235 | 46.94 (0) | 4.82 | 83.30 | -11.35  |
| C <sub>3</sub> H <sub>2</sub> O <sub>4</sub> <sup>2-</sup>  | C <sub>s</sub>  | M052X | UFF     | -416.54713 | 32.67 (0) | 4.63 | 84.23 | -204.43 |
| HC <sub>3</sub> H <sub>2</sub> O <sub>4</sub> <sup>-</sup>  | C <sub>1</sub>  | M052X | UFF     | -417.26899 | 39.91 (0) | 4.41 | 80.71 | -53.05  |
| H <sub>2</sub> C <sub>3</sub> H <sub>2</sub> O <sub>4</sub> | C <sub>1</sub>  | M052X | UFF     | -417.78425 | 49.41 (0) | 4.77 | 84.68 | -6.40   |
| C <sub>3</sub> H <sub>2</sub> O <sub>4</sub> <sup>2-</sup>  | C <sub>s</sub>  | M052X | UAKS    | -416.54713 | 32.67 (0) | 4.63 | 84.23 | -216.97 |
| HC <sub>3</sub> H <sub>2</sub> O <sub>4</sub> <sup>-</sup>  | C <sub>1</sub>  | M052X | UAKS    | -417.26899 | 39.91 (0) | 4.41 | 80.71 | -58.63  |
| H <sub>2</sub> C <sub>3</sub> H <sub>2</sub> O <sub>4</sub> | C <sub>1</sub>  | M052X | UAKS    | -417.78425 | 49.41 (0) | 4.77 | 84.68 | -15.49  |
| C <sub>3</sub> H <sub>2</sub> O <sub>4</sub> <sup>2-</sup>  | C <sub>s</sub>  | M052X | Pauling | -416.54713 | 32.67 (0) | 4.63 | 84.23 | -222.75 |
| HC <sub>3</sub> H <sub>2</sub> O <sub>4</sub> <sup>-</sup>  | C <sub>1</sub>  | M052X | Pauling | -417.26899 | 39.91 (0) | 4.41 | 80.71 | -64.33  |
| H <sub>2</sub> C <sub>3</sub> H <sub>2</sub> O <sub>4</sub> | C <sub>1</sub>  | M052X | Pauling | -417.78425 | 49.41 (0) | 4.77 | 84.68 | -20.47  |
| C <sub>3</sub> H <sub>2</sub> O <sub>4</sub> <sup>2-</sup>  | C <sub>s</sub>  | M052X | Klamt   | -416.54713 | 32.67 (0) | 4.63 | 84.23 | -206.64 |
| HC <sub>3</sub> H <sub>2</sub> O <sub>4</sub> <sup>-</sup>  | C <sub>1</sub>  | M052X | Klamt   | -417.26899 | 39.91 (0) | 4.41 | 80.71 | -54.94  |
| H <sub>2</sub> C <sub>3</sub> H <sub>2</sub> O <sub>4</sub> | C <sub>1</sub>  | M052X | Klamt   | -417.78426 | 49.39 (0) | 4.77 | 84.28 | -9.14   |
| C <sub>3</sub> H <sub>2</sub> O <sub>4</sub> <sup>2-</sup>  | C <sub>s</sub>  | M052X | SMD     | -416.54713 | 32.67 (0) | 4.63 | 84.23 | -216.43 |
| HC <sub>3</sub> H <sub>2</sub> O <sub>4</sub> <sup>-</sup>  | C <sub>1</sub>  | M052X | SMD     | -417.26899 | 39.91 (0) | 4.41 | 80.71 | -58.24  |
| H <sub>2</sub> C <sub>3</sub> H <sub>2</sub> O <sub>4</sub> | C <sub>1</sub>  | M052X | SMD     | -417.78426 | 49.39 (0) | 4.77 | 84.28 | -13.21  |
| HPO <sub>3</sub> <sup>2-</sup>                              | C <sub>3v</sub> | B3LYP | UFF     | -567.76830 | 11.76 (0) | 2.97 | 64.05 | -229.09 |
| H <sub>2</sub> PO <sub>3</sub> <sup>-</sup>                 | C <sub>1</sub>  | B3LYP | UFF     | -568.51148 | 19.69 (0) | 3.33 | 68.34 | -62.26  |
| H <sub>3</sub> PO <sub>3</sub>                              | C <sub>1</sub>  | B3LYP | UFF     | -569.04709 | 26.88 (0) | 3.86 | 72.13 | -6.97   |
| HPO <sub>3</sub> <sup>2-</sup>                              | C <sub>3v</sub> | B3LYP | UAKS    | -567.76830 | 11.76 (0) | 2.97 | 64.05 | -229.25 |
| H <sub>2</sub> PO <sub>3</sub> <sup>-</sup>                 | C <sub>1</sub>  | B3LYP | UAKS    | -568.51148 | 19.69 (0) | 3.33 | 68.34 | -63.34  |
| H <sub>3</sub> PO <sub>3</sub>                              | C <sub>1</sub>  | B3LYP | UAKS    | -569.04710 | 26.87 (0) | 3.87 | 72.24 | -9.63   |
| HPO <sub>3</sub> <sup>2-</sup>                              | C <sub>3v</sub> | B3LYP | Pauling | -567.76830 | 11.76 (0) | 2.97 | 64.05 | -246.09 |
| H <sub>2</sub> PO <sub>3</sub> <sup>-</sup>                 | C <sub>1</sub>  | B3LYP | Pauling | -568.51148 | 19.69 (0) | 3.33 | 68.34 | -72.91  |
| H <sub>3</sub> PO <sub>3</sub>                              | C <sub>1</sub>  | B3LYP | Pauling | -569.04709 | 26.88 (0) | 3.86 | 72.13 | -17.87  |
| HPO <sub>3</sub> <sup>2-</sup>                              | C <sub>3v</sub> | B3LYP | Klamt   | -567.76830 | 11.76 (0) | 2.97 | 64.05 | -230.67 |
| H <sub>2</sub> PO <sub>3</sub> <sup>-</sup>                 | C <sub>1</sub>  | B3LYP | Klamt   | -568.51148 | 19.69 (0) | 3.33 | 68.34 | -63.90  |
| H <sub>3</sub> PO <sub>3</sub>                              | C <sub>1</sub>  | B3LYP | Klamt   | -569.04709 | 26.88 (0) | 3.86 | 72.13 | -9.37   |
| HPO <sub>3</sub> <sup>2-</sup>                              | C <sub>3v</sub> | B3LYP | SMD     | -567.76830 | 11.76 (0) | 2.97 | 64.05 | -237.27 |
| H <sub>2</sub> PO <sub>3</sub> <sup>-</sup>                 | C <sub>1</sub>  | B3LYP | SMD     | -568.51148 | 19.69 (0) | 3.33 | 68.34 | -66.37  |
| H <sub>3</sub> PO <sub>3</sub>                              | C <sub>1</sub>  | B3LYP | SMD     | -569.04709 | 26.88 (0) | 3.86 | 72.13 | -11.36  |
| HPO <sub>3</sub> <sup>2-</sup>                              | C <sub>3v</sub> | PBE   | UFF     | -567.36540 | 11.08 (0) | 3.05 | 64.51 | -225.81 |
| H <sub>2</sub> PO <sub>3</sub> <sup>-</sup>                 | C <sub>1</sub>  | PBE   | UFF     | -568.10375 | 18.87 (0) | 3.41 | 68.80 | -60.66  |
| H <sub>3</sub> PO <sub>3</sub>                              | C <sub>1</sub>  | PBE   | UFF     | -568.63581 | 25.95 (0) | 3.92 | 72.51 | -5.94   |
| HPO <sub>3</sub> <sup>2-</sup>                              | C <sub>3v</sub> | PBE   | UAKS    | -567.36540 | 11.08 (0) | 3.05 | 64.51 | -226.02 |



|                                                               |                 |       |         |            |          |      |       |         |
|---------------------------------------------------------------|-----------------|-------|---------|------------|----------|------|-------|---------|
| H <sub>2</sub> PO <sub>3</sub> <sup>-</sup>                   | C <sub>1</sub>  | PBE   | UAKS    | -568.10375 | 18.87(0) | 3.41 | 68.80 | -62.02  |
| H <sub>3</sub> PO <sub>3</sub>                                | C <sub>1</sub>  | PBE   | UAKS    | -568.63580 | 25.95(0) | 3.92 | 72.56 | -9.30   |
| HPO <sub>3</sub> <sup>2-</sup>                                | C <sub>3v</sub> | PBE   | Pauling | -567.36540 | 11.08(0) | 3.05 | 64.51 | -241.07 |
| H <sub>2</sub> PO <sub>3</sub> <sup>-</sup>                   | C <sub>1</sub>  | PBE   | Pauling | -568.10375 | 18.87(0) | 3.41 | 68.80 | -70.17  |
| H <sub>3</sub> PO <sub>3</sub>                                | C <sub>1</sub>  | PBE   | Pauling | -568.63581 | 25.95(0) | 3.92 | 72.51 | -16.12  |
| HPO <sub>3</sub> <sup>2-</sup>                                | C <sub>3v</sub> | PBE   | Klamt   | -567.36540 | 11.08(0) | 3.05 | 64.51 | -227.25 |
| H <sub>2</sub> PO <sub>3</sub> <sup>-</sup>                   | C <sub>1</sub>  | PBE   | Klamt   | -568.10375 | 18.87(0) | 3.41 | 68.80 | -62.20  |
| H <sub>3</sub> PO <sub>3</sub>                                | C <sub>1</sub>  | PBE   | Klamt   | -568.63581 | 25.95(0) | 3.92 | 72.51 | -8.75   |
| HPO <sub>3</sub> <sup>2-</sup>                                | C <sub>3v</sub> | PBE   | SMD     | -567.36540 | 11.08(0) | 3.05 | 64.51 | -233.02 |
| H <sub>2</sub> PO <sub>3</sub> <sup>-</sup>                   | C <sub>1</sub>  | PBE   | SMD     | -568.10375 | 18.87(0) | 3.41 | 68.80 | -64.21  |
| H <sub>3</sub> PO <sub>3</sub>                                | C <sub>1</sub>  | PBE   | SMD     | -568.63581 | 25.95(0) | 3.92 | 72.51 | -10.03  |
| HPO <sub>3</sub> <sup>2-</sup>                                | C <sub>3v</sub> | BVP86 | UFF     | -567.81452 | 11.10(0) | 3.05 | 64.48 | -226.85 |
| H <sub>2</sub> PO <sub>3</sub> <sup>-</sup>                   | C <sub>1</sub>  | BVP86 | UFF     | -568.55388 | 18.87(0) | 3.40 | 68.79 | -61.05  |
| H <sub>3</sub> PO <sub>3</sub>                                | C <sub>1</sub>  | BVP86 | UFF     | -569.08690 | 25.97(0) | 3.91 | 72.35 | -6.05   |
| HPO <sub>3</sub> <sup>2-</sup>                                | C <sub>3v</sub> | BVP86 | UAKS    | -567.81452 | 11.10(0) | 3.05 | 64.48 | -227.02 |
| H <sub>2</sub> PO <sub>3</sub> <sup>-</sup>                   | C <sub>1</sub>  | BVP86 | UAKS    | -568.55388 | 18.87(0) | 3.40 | 68.78 | -62.32  |
| H <sub>3</sub> PO <sub>3</sub>                                | C <sub>1</sub>  | BVP86 | UAKS    | -569.08690 | 25.95(0) | 3.92 | 72.49 | -9.35   |
| HPO <sub>3</sub> <sup>2-</sup>                                | C <sub>3v</sub> | BVP86 | Pauling | -567.81452 | 11.10(0) | 3.05 | 64.48 | -242.53 |
| H <sub>2</sub> PO <sub>3</sub> <sup>-</sup>                   | C <sub>1</sub>  | BVP86 | Pauling | -568.55388 | 18.87(0) | 3.40 | 68.78 | -70.84  |
| H <sub>3</sub> PO <sub>3</sub>                                | C <sub>1</sub>  | BVP86 | Pauling | -569.08690 | 25.97(0) | 3.91 | 72.35 | -16.34  |
| HPO <sub>3</sub> <sup>2-</sup>                                | C <sub>3v</sub> | BVP86 | Klamt   | -567.81452 | 11.10(0) | 3.05 | 64.48 | -228.33 |
| H <sub>2</sub> PO <sub>3</sub> <sup>-</sup>                   | C <sub>1</sub>  | BVP86 | Klamt   | -568.55388 | 18.87(0) | 3.40 | 68.79 | -62.61  |
| H <sub>3</sub> PO <sub>3</sub>                                | C <sub>1</sub>  | BVP86 | Klamt   | -569.08690 | 25.97(0) | 3.91 | 72.35 | -8.86   |
| HPO <sub>3</sub> <sup>2-</sup>                                | C <sub>3v</sub> | BVP86 | SMD     | -567.81452 | 11.10(0) | 3.05 | 64.48 | -234.28 |
| H <sub>2</sub> PO <sub>3</sub> <sup>-</sup>                   | C <sub>1</sub>  | BVP86 | SMD     | -568.55388 | 18.87(0) | 3.40 | 68.79 | -64.78  |
| H <sub>3</sub> PO <sub>3</sub>                                | C <sub>1</sub>  | BVP86 | SMD     | -569.08690 | 25.97(0) | 3.91 | 72.35 | -10.19  |
| HPO <sub>3</sub> <sup>2-</sup>                                | C <sub>3v</sub> | M052X | UFF     | -567.72507 | 12.25(0) | 2.92 | 63.78 | -233.34 |
| H <sub>2</sub> PO <sub>3</sub> <sup>-</sup>                   | C <sub>1</sub>  | M052X | UFF     | -568.46950 | 20.24(0) | 3.27 | 67.97 | -64.22  |
| H <sub>3</sub> PO <sub>3</sub>                                | C <sub>1</sub>  | M052X | UFF     | -569.00509 | 27.35(0) | 3.85 | 72.31 | -7.55   |
| HPO <sub>3</sub> <sup>2-</sup>                                | C <sub>3v</sub> | M052X | UAKS    | -567.72507 | 12.25(0) | 2.92 | 63.78 | -233.19 |
| H <sub>2</sub> PO <sub>3</sub> <sup>-</sup>                   | C <sub>1</sub>  | M052X | UAKS    | -568.46951 | 20.27(0) | 3.27 | 67.98 | -64.98  |
| H <sub>3</sub> PO <sub>3</sub>                                | C <sub>1</sub>  | M052X | UAKS    | -569.00509 | 27.40(0) | 3.80 | 71.72 | -10.34  |
| HPO <sub>3</sub> <sup>2-</sup>                                | C <sub>3v</sub> | M052X | Pauling | -567.72507 | 12.25(0) | 2.92 | 63.78 | -252.39 |
| H <sub>2</sub> PO <sub>3</sub> <sup>-</sup>                   | C <sub>1</sub>  | M052X | Pauling | -568.46951 | 20.27(0) | 3.27 | 67.98 | -76.18  |
| H <sub>3</sub> PO <sub>3</sub>                                | C <sub>1</sub>  | M052X | Pauling | -569.00509 | 27.35(0) | 3.85 | 72.31 | -19.21  |
| HPO <sub>3</sub> <sup>2-</sup>                                | C <sub>3v</sub> | M052X | Klamt   | -567.72507 | 12.25(0) | 2.92 | 63.78 | -235.05 |
| H <sub>2</sub> PO <sub>3</sub> <sup>-</sup>                   | C <sub>1</sub>  | M052X | Klamt   | -568.46950 | 20.24(0) | 3.27 | 67.97 | -65.99  |
| H <sub>3</sub> PO <sub>3</sub>                                | C <sub>1</sub>  | M052X | Klamt   | -569.00509 | 27.35(0) | 3.85 | 72.31 | -10.49  |
| HPO <sub>3</sub> <sup>2-</sup>                                | C <sub>3v</sub> | M052X | SMD     | -567.72507 | 12.25(0) | 2.92 | 63.78 | -242.65 |
| H <sub>2</sub> PO <sub>3</sub> <sup>-</sup>                   | C <sub>1</sub>  | M052X | SMD     | -568.46950 | 20.24(0) | 3.27 | 67.97 | -69.05  |
| H <sub>3</sub> PO <sub>3</sub>                                | C <sub>1</sub>  | M052X | SMD     | -569.00509 | 27.35(0) | 3.85 | 72.31 | -12.49  |
| C <sub>2</sub> H <sub>2</sub> O <sub>2</sub> S <sup>2-</sup>  | C <sub>s</sub>  | B3LYP | UFF     | -626.14461 | 24.49(0) | 3.78 | 75.05 | -205.74 |
| HC <sub>2</sub> H <sub>2</sub> O <sub>2</sub> S <sup>-</sup>  | C <sub>s</sub>  | B3LYP | UFF     | -626.85928 | 30.23(0) | 3.96 | 75.09 | -55.55  |
| H <sub>2</sub> C <sub>2</sub> H <sub>2</sub> O <sub>2</sub> S | C <sub>s</sub>  | B3LYP | UFF     | -627.40046 | 38.47(0) | 4.30 | 77.84 | -3.15   |
| C <sub>2</sub> H <sub>2</sub> O <sub>2</sub> S <sup>2-</sup>  | C <sub>s</sub>  | B3LYP | UAKS    | -626.14461 | 24.49(0) | 3.78 | 75.05 | -213.93 |
| HC <sub>2</sub> H <sub>2</sub> O <sub>2</sub> S <sup>-</sup>  | C <sub>s</sub>  | B3LYP | UAKS    | -626.85928 | 30.23(0) | 3.96 | 75.09 | -60.97  |
| H <sub>2</sub> C <sub>2</sub> H <sub>2</sub> O <sub>2</sub> S | C <sub>s</sub>  | B3LYP | UAKS    | -627.40046 | 38.47(0) | 4.30 | 77.84 | -9.47   |

|                                                               |                |       |         |            |          |      |       |         |
|---------------------------------------------------------------|----------------|-------|---------|------------|----------|------|-------|---------|
| C <sub>2</sub> H <sub>2</sub> O <sub>2</sub> S <sup>2-</sup>  | C <sub>s</sub> | B3LYP | Pauling | -626.14461 | 24.49(0) | 3.78 | 75.05 | -215.98 |
| HC <sub>2</sub> H <sub>2</sub> O <sub>2</sub> S <sup>-</sup>  | C <sub>s</sub> | B3LYP | Pauling | -626.85928 | 30.23(0) | 3.96 | 75.09 | -63.85  |
| H <sub>2</sub> C <sub>2</sub> H <sub>2</sub> O <sub>2</sub> S | C <sub>s</sub> | B3LYP | Pauling | -627.40046 | 38.47(0) | 4.30 | 77.84 | -12.17  |
| C <sub>2</sub> H <sub>2</sub> O <sub>2</sub> S <sup>2-</sup>  | C <sub>s</sub> | B3LYP | Klamt   | -626.14461 | 24.49(0) | 3.78 | 75.05 | -204.30 |
| HC <sub>2</sub> H <sub>2</sub> O <sub>2</sub> S <sup>-</sup>  | C <sub>s</sub> | B3LYP | Klamt   | -626.85928 | 30.23(0) | 3.96 | 75.09 | -56.25  |
| H <sub>2</sub> C <sub>2</sub> H <sub>2</sub> O <sub>2</sub> S | C <sub>s</sub> | B3LYP | Klamt   | -627.40046 | 38.47(0) | 4.30 | 77.84 | -5.34   |
| C <sub>2</sub> H <sub>2</sub> O <sub>2</sub> S <sup>2-</sup>  | C <sub>s</sub> | B3LYP | SMD     | -626.14461 | 24.49(0) | 3.78 | 75.05 | -205.52 |
| HC <sub>2</sub> H <sub>2</sub> O <sub>2</sub> S <sup>-</sup>  | C <sub>s</sub> | B3LYP | SMD     | -626.85928 | 30.23(0) | 3.96 | 75.09 | -59.95  |
| H <sub>2</sub> C <sub>2</sub> H <sub>2</sub> O <sub>2</sub> S | C <sub>s</sub> | B3LYP | SMD     | -627.40046 | 38.47(0) | 4.30 | 77.84 | -7.89   |
| C <sub>2</sub> H <sub>2</sub> O <sub>2</sub> S <sup>2-</sup>  | C <sub>s</sub> | PBE   | UFF     | -625.70638 | 23.62(0) | 3.85 | 75.73 | -203.75 |
| HC <sub>2</sub> H <sub>2</sub> O <sub>2</sub> S <sup>-</sup>  | C <sub>s</sub> | PBE   | UFF     | -626.41382 | 29.15(0) | 4.18 | 76.67 | -58.00  |
| H <sub>2</sub> C <sub>2</sub> H <sub>2</sub> O <sub>2</sub> S | C <sub>s</sub> | PBE   | UFF     | -626.95678 | 37.32(0) | 4.35 | 78.08 | -1.70   |
| C <sub>2</sub> H <sub>2</sub> O <sub>2</sub> S <sup>2-</sup>  | C <sub>s</sub> | PBE   | UAKS    | -625.70638 | 23.62(0) | 3.85 | 75.73 | -211.80 |
| HC <sub>2</sub> H <sub>2</sub> O <sub>2</sub> S <sup>-</sup>  | C <sub>s</sub> | PBE   | UAKS    | -626.41382 | 29.15(0) | 4.18 | 76.67 | -63.72  |
| H <sub>2</sub> C <sub>2</sub> H <sub>2</sub> O <sub>2</sub> S | C <sub>s</sub> | PBE   | UAKS    | -626.95678 | 37.32(0) | 4.35 | 78.08 | -9.73   |
| C <sub>2</sub> H <sub>2</sub> O <sub>2</sub> S <sup>2-</sup>  | C <sub>s</sub> | PBE   | Pauling | -625.70638 | 23.62(0) | 3.85 | 75.73 | -213.27 |
| HC <sub>2</sub> H <sub>2</sub> O <sub>2</sub> S <sup>-</sup>  | C <sub>s</sub> | PBE   | Pauling | -626.41382 | 29.15(0) | 4.18 | 76.67 | -66.18  |
| H <sub>2</sub> C <sub>2</sub> H <sub>2</sub> O <sub>2</sub> S | C <sub>s</sub> | PBE   | Pauling | -626.95678 | 37.32(0) | 4.35 | 78.08 | -11.09  |
| C <sub>2</sub> H <sub>2</sub> O <sub>2</sub> S <sup>2-</sup>  | C <sub>s</sub> | PBE   | Klamt   | -625.70638 | 23.62(0) | 3.85 | 75.73 | -202.24 |
| HC <sub>2</sub> H <sub>2</sub> O <sub>2</sub> S <sup>-</sup>  | C <sub>s</sub> | PBE   | Klamt   | -626.41382 | 29.15(0) | 4.18 | 76.67 | -59.18  |
| H <sub>2</sub> C <sub>2</sub> H <sub>2</sub> O <sub>2</sub> S | C <sub>s</sub> | PBE   | Klamt   | -626.95678 | 37.32(0) | 4.35 | 78.08 | -4.80   |
| C <sub>2</sub> H <sub>2</sub> O <sub>2</sub> S <sup>2-</sup>  | C <sub>s</sub> | PBE   | SMD     | -625.70638 | 23.62(0) | 3.85 | 75.73 | -203.30 |
| HC <sub>2</sub> H <sub>2</sub> O <sub>2</sub> S <sup>-</sup>  | C <sub>s</sub> | PBE   | SMD     | -626.41382 | 29.15(0) | 4.18 | 76.67 | -62.36  |
| H <sub>2</sub> C <sub>2</sub> H <sub>2</sub> O <sub>2</sub> S | C <sub>s</sub> | PBE   | SMD     | -626.95678 | 37.32(0) | 4.35 | 78.08 | -7.46   |
| C <sub>2</sub> H <sub>2</sub> O <sub>2</sub> S <sup>2-</sup>  | C <sub>s</sub> | BVP86 | UFF     | -626.19650 | 23.59(0) | 3.85 | 75.80 | -204.39 |
| HC <sub>2</sub> H <sub>2</sub> O <sub>2</sub> S <sup>-</sup>  | C <sub>s</sub> | BVP86 | UFF     | -626.90427 | 29.11(0) | 4.18 | 76.69 | -58.36  |
| H <sub>2</sub> C <sub>2</sub> H <sub>2</sub> O <sub>2</sub> S | C <sub>s</sub> | BVP86 | UFF     | -627.44808 | 37.27(0) | 4.35 | 78.14 | -1.73   |
| C <sub>2</sub> H <sub>2</sub> O <sub>2</sub> S <sup>2-</sup>  | C <sub>s</sub> | BVP86 | UAKS    | -626.19650 | 23.59(0) | 3.85 | 75.80 | -212.50 |
| HC <sub>2</sub> H <sub>2</sub> O <sub>2</sub> S <sup>-</sup>  | C <sub>s</sub> | BVP86 | UAKS    | -626.90427 | 29.11(0) | 4.18 | 76.69 | -64.09  |
| H <sub>2</sub> C <sub>2</sub> H <sub>2</sub> O <sub>2</sub> S | C <sub>s</sub> | BVP86 | UAKS    | -627.44808 | 37.27(0) | 4.35 | 78.14 | -9.70   |
| C <sub>2</sub> H <sub>2</sub> O <sub>2</sub> S <sup>2-</sup>  | C <sub>s</sub> | BVP86 | Pauling | -626.19650 | 23.59(0) | 3.85 | 75.80 | -214.11 |
| HC <sub>2</sub> H <sub>2</sub> O <sub>2</sub> S <sup>-</sup>  | C <sub>s</sub> | BVP86 | Pauling | -626.90427 | 29.11(0) | 4.18 | 76.69 | -66.74  |
| H <sub>2</sub> C <sub>2</sub> H <sub>2</sub> O <sub>2</sub> S | C <sub>s</sub> | BVP86 | Pauling | -627.44808 | 37.27(0) | 4.35 | 78.14 | -11.18  |
| C <sub>2</sub> H <sub>2</sub> O <sub>2</sub> S <sup>2-</sup>  | C <sub>s</sub> | BVP86 | Klamt   | -626.19650 | 23.59(0) | 3.85 | 75.80 | -202.89 |
| HC <sub>2</sub> H <sub>2</sub> O <sub>2</sub> S <sup>-</sup>  | C <sub>s</sub> | BVP86 | Klamt   | -626.90427 | 29.11(0) | 4.18 | 76.69 | -59.53  |
| H <sub>2</sub> C <sub>2</sub> H <sub>2</sub> O <sub>2</sub> S | C <sub>s</sub> | BVP86 | Klamt   | -627.44808 | 37.27(0) | 4.35 | 78.14 | -4.82   |
| C <sub>2</sub> H <sub>2</sub> O <sub>2</sub> S <sup>2-</sup>  | C <sub>s</sub> | BVP86 | SMD     | -626.19650 | 23.59(0) | 3.85 | 75.80 | -203.99 |
| HC <sub>2</sub> H <sub>2</sub> O <sub>2</sub> S <sup>-</sup>  | C <sub>s</sub> | BVP86 | SMD     | -626.90427 | 29.11(0) | 4.18 | 76.69 | -62.81  |
| H <sub>2</sub> C <sub>2</sub> H <sub>2</sub> O <sub>2</sub> S | C <sub>s</sub> | BVP86 | SMD     | -627.44808 | 37.27(0) | 4.35 | 78.14 | -7.49   |
| C <sub>2</sub> H <sub>2</sub> O <sub>2</sub> S <sup>2-</sup>  | C <sub>s</sub> | M052X | UFF     | -626.09557 | 25.26(0) | 3.72 | 74.63 | -209.73 |
| HC <sub>2</sub> H <sub>2</sub> O <sub>2</sub> S <sup>-</sup>  | C <sub>s</sub> | M052X | UFF     | -626.80919 | 31.28(0) | 3.86 | 74.57 | -57.56  |
| H <sub>2</sub> C <sub>2</sub> H <sub>2</sub> O <sub>2</sub> S | C <sub>1</sub> | M052X | UFF     | -627.35164 | 39.34(0) | 4.28 | 78.36 | -2.64   |
| C <sub>2</sub> H <sub>2</sub> O <sub>2</sub> S <sup>2-</sup>  | C <sub>s</sub> | M052X | UAKS    | -626.09557 | 25.26(0) | 3.72 | 74.63 | -218.27 |
| HC <sub>2</sub> H <sub>2</sub> O <sub>2</sub> S <sup>-</sup>  | C <sub>s</sub> | M052X | UAKS    | -626.80919 | 31.28(0) | 3.86 | 74.57 | -62.93  |
| H <sub>2</sub> C <sub>2</sub> H <sub>2</sub> O <sub>2</sub> S | C <sub>1</sub> | M052X | UAKS    | -627.35164 | 39.34(0) | 4.28 | 78.36 | -9.10   |
| C <sub>2</sub> H <sub>2</sub> O <sub>2</sub> S <sup>2-</sup>  | C <sub>s</sub> | M052X | Pauling | -626.09557 | 25.26(0) | 3.72 | 74.63 | -221.11 |
| HC <sub>2</sub> H <sub>2</sub> O <sub>2</sub> S <sup>-</sup>  | C <sub>s</sub> | M052X | Pauling | -626.80919 | 31.28(0) | 3.86 | 74.57 | -66.32  |

|                                                                          |                |       |         |            |           |      |       |         |
|--------------------------------------------------------------------------|----------------|-------|---------|------------|-----------|------|-------|---------|
| H <sub>2</sub> C <sub>2</sub> H <sub>2</sub> O <sub>2</sub> S            | C <sub>1</sub> | M052X | Pauling | -627.35164 | 39.34 (0) | 4.28 | 78.36 | -11.25  |
| C <sub>2</sub> H <sub>2</sub> O <sub>2</sub> S <sup>2-</sup>             | C <sub>s</sub> | M052X | Klamt   | -626.09557 | 25.26 (0) | 3.72 | 74.63 | -208.25 |
| HC <sub>2</sub> H <sub>2</sub> O <sub>2</sub> S <sup>-</sup>             | C <sub>s</sub> | M052X | Klamt   | -626.80919 | 31.28 (0) | 3.86 | 74.57 | -58.38  |
| H <sub>2</sub> C <sub>2</sub> H <sub>2</sub> O <sub>2</sub> S            | C <sub>1</sub> | M052X | Klamt   | -627.35164 | 39.34 (0) | 4.28 | 78.36 | -4.50   |
| C <sub>2</sub> H <sub>2</sub> O <sub>2</sub> S <sup>2-</sup>             | C <sub>s</sub> | M052X | SMD     | -626.09557 | 25.26 (0) | 3.72 | 74.63 | -209.89 |
| HC <sub>2</sub> H <sub>2</sub> O <sub>2</sub> S <sup>-</sup>             | C <sub>s</sub> | M052X | SMD     | -626.80919 | 31.28 (0) | 3.86 | 74.57 | -62.14  |
| H <sub>2</sub> C <sub>2</sub> H <sub>2</sub> O <sub>2</sub> S            | C <sub>1</sub> | M052X | SMD     | -627.35164 | 39.34 (0) | 4.28 | 78.36 | -8.57   |
| <sup>f</sup> C <sub>4</sub> H <sub>2</sub> O <sub>4</sub> <sup>2-</sup>  | C <sub>1</sub> | B3LYP | UFF     | -454.69350 | 34.84 (0) | 5.22 | 89.23 | -193.67 |
| <sup>f</sup> HC <sub>4</sub> H <sub>2</sub> O <sub>4</sub> <sup>-</sup>  | C <sub>s</sub> | B3LYP | UFF     | -455.40920 | 42.50 (0) | 4.88 | 83.71 | -49.92  |
| <sup>f</sup> H <sub>2</sub> C <sub>4</sub> H <sub>2</sub> O <sub>4</sub> | C <sub>s</sub> | B3LYP | UFF     | -455.92464 | 52.22 (0) | 5.12 | 85.67 | -5.21   |
| <sup>f</sup> C <sub>4</sub> H <sub>2</sub> O <sub>4</sub> <sup>2-</sup>  | C <sub>1</sub> | B3LYP | UAKS    | -454.69350 | 34.84 (0) | 5.22 | 89.23 | -204.54 |
| <sup>f</sup> HC <sub>4</sub> H <sub>2</sub> O <sub>4</sub> <sup>-</sup>  | C <sub>s</sub> | B3LYP | UAKS    | -455.40920 | 42.50 (0) | 4.88 | 83.71 | -53.98  |
| <sup>f</sup> H <sub>2</sub> C <sub>4</sub> H <sub>2</sub> O <sub>4</sub> | C <sub>s</sub> | B3LYP | UAKS    | -455.92464 | 52.22 (0) | 5.12 | 85.67 | -12.01  |
| <sup>f</sup> C <sub>4</sub> H <sub>2</sub> O <sub>4</sub> <sup>2-</sup>  | C <sub>1</sub> | B3LYP | Pauling | -454.69350 | 34.84 (0) | 5.22 | 89.23 | -209.21 |
| <sup>f</sup> HC <sub>4</sub> H <sub>2</sub> O <sub>4</sub> <sup>-</sup>  | C <sub>s</sub> | B3LYP | Pauling | -455.40920 | 42.50 (0) | 4.88 | 83.71 | -60.55  |
| <sup>f</sup> H <sub>2</sub> C <sub>4</sub> H <sub>2</sub> O <sub>4</sub> | C <sub>s</sub> | B3LYP | Pauling | -455.92464 | 52.22 (0) | 5.12 | 85.67 | -18.96  |
| <sup>f</sup> C <sub>4</sub> H <sub>2</sub> O <sub>4</sub> <sup>2-</sup>  | C <sub>1</sub> | B3LYP | Klamt   | -454.69350 | 34.84 (0) | 5.22 | 89.23 | -195.72 |
| <sup>f</sup> HC <sub>4</sub> H <sub>2</sub> O <sub>4</sub> <sup>-</sup>  | C <sub>s</sub> | B3LYP | Klamt   | -455.40920 | 42.50 (0) | 4.88 | 83.71 | -51.23  |
| <sup>f</sup> H <sub>2</sub> C <sub>4</sub> H <sub>2</sub> O <sub>4</sub> | C <sub>s</sub> | B3LYP | Klamt   | -455.92464 | 52.22 (0) | 5.12 | 85.67 | -7.34   |
| <sup>f</sup> C <sub>4</sub> H <sub>2</sub> O <sub>4</sub> <sup>2-</sup>  | C <sub>1</sub> | B3LYP | SMD     | -454.69350 | 34.84 (0) | 5.22 | 89.23 | -204.31 |
| <sup>f</sup> HC <sub>4</sub> H <sub>2</sub> O <sub>4</sub> <sup>-</sup>  | C <sub>s</sub> | B3LYP | SMD     | -455.40920 | 42.50 (0) | 4.88 | 83.71 | -54.30  |
| <sup>f</sup> H <sub>2</sub> C <sub>4</sub> H <sub>2</sub> O <sub>4</sub> | C <sub>s</sub> | B3LYP | SMD     | -455.92464 | 52.22 (0) | 5.12 | 85.67 | -11.10  |
| <sup>f</sup> C <sub>4</sub> H <sub>2</sub> O <sub>4</sub> <sup>2-</sup>  | C <sub>1</sub> | PBE   | UFF     | -454.20573 | 33.55 (0) | 5.34 | 90.10 | -191.26 |
| <sup>f</sup> HC <sub>4</sub> H <sub>2</sub> O <sub>4</sub> <sup>-</sup>  | C <sub>s</sub> | PBE   | UFF     | -454.92030 | 40.45 (0) | 5.01 | 84.41 | -48.50  |
| <sup>f</sup> H <sub>2</sub> C <sub>4</sub> H <sub>2</sub> O <sub>4</sub> | C <sub>s</sub> | PBE   | UFF     | -455.43110 | 50.46 (0) | 5.22 | 86.46 | -4.36   |
| <sup>f</sup> C <sub>4</sub> H <sub>2</sub> O <sub>4</sub> <sup>2-</sup>  | C <sub>1</sub> | PBE   | UAKS    | -454.20573 | 33.55 (0) | 5.34 | 90.10 | -201.67 |
| <sup>f</sup> HC <sub>4</sub> H <sub>2</sub> O <sub>4</sub> <sup>-</sup>  | C <sub>s</sub> | PBE   | UAKS    | -454.92030 | 40.45 (0) | 5.01 | 84.41 | -52.73  |
| <sup>f</sup> H <sub>2</sub> C <sub>4</sub> H <sub>2</sub> O <sub>4</sub> | C <sub>s</sub> | PBE   | UAKS    | -455.43110 | 50.46 (0) | 5.22 | 86.46 | -11.67  |
| <sup>f</sup> C <sub>4</sub> H <sub>2</sub> O <sub>4</sub> <sup>2-</sup>  | C <sub>1</sub> | PBE   | Pauling | -454.20573 | 33.55 (0) | 5.34 | 90.10 | -205.18 |
| <sup>f</sup> HC <sub>4</sub> H <sub>2</sub> O <sub>4</sub> <sup>-</sup>  | C <sub>s</sub> | PBE   | Pauling | -454.92030 | 40.45 (0) | 5.01 | 84.41 | -57.49  |
| <sup>f</sup> H <sub>2</sub> C <sub>4</sub> H <sub>2</sub> O <sub>4</sub> | C <sub>s</sub> | PBE   | Pauling | -455.43110 | 50.46 (0) | 5.22 | 86.46 | -16.79  |
| <sup>f</sup> C <sub>4</sub> H <sub>2</sub> O <sub>4</sub> <sup>2-</sup>  | C <sub>1</sub> | PBE   | Klamt   | -454.20573 | 33.55 (0) | 5.34 | 90.10 | -193.17 |
| <sup>f</sup> HC <sub>4</sub> H <sub>2</sub> O <sub>4</sub> <sup>-</sup>  | C <sub>s</sub> | PBE   | Klamt   | -454.92030 | 40.45 (0) | 5.01 | 84.41 | -49.81  |
| <sup>f</sup> H <sub>2</sub> C <sub>4</sub> H <sub>2</sub> O <sub>4</sub> | C <sub>s</sub> | PBE   | Klamt   | -455.43110 | 50.46 (0) | 5.22 | 86.46 | -6.54   |
| <sup>f</sup> C <sub>4</sub> H <sub>2</sub> O <sub>4</sub> <sup>2-</sup>  | C <sub>1</sub> | PBE   | SMD     | -454.20573 | 33.55 (0) | 5.34 | 90.10 | -201.28 |
| <sup>f</sup> HC <sub>4</sub> H <sub>2</sub> O <sub>4</sub> <sup>-</sup>  | C <sub>s</sub> | PBE   | SMD     | -454.92030 | 40.45 (0) | 5.01 | 84.41 | -52.48  |
| <sup>f</sup> H <sub>2</sub> C <sub>4</sub> H <sub>2</sub> O <sub>4</sub> | C <sub>s</sub> | PBE   | SMD     | -455.43110 | 50.46 (0) | 5.22 | 86.46 | -10.22  |
| <sup>f</sup> C <sub>4</sub> H <sub>2</sub> O <sub>4</sub> <sup>2-</sup>  | C <sub>1</sub> | BVP86 | UFF     | -454.73231 | 33.51 (0) | 5.34 | 90.12 | -191.95 |
| <sup>f</sup> HC <sub>4</sub> H <sub>2</sub> O <sub>4</sub> <sup>-</sup>  | C <sub>s</sub> | BVP86 | UFF     | -455.44797 | 40.36 (0) | 5.02 | 84.40 | -48.83  |
| <sup>f</sup> H <sub>2</sub> C <sub>4</sub> H <sub>2</sub> O <sub>4</sub> | C <sub>s</sub> | BVP86 | UFF     | -455.95959 | 50.39 (0) | 5.22 | 86.40 | -3.25   |
| <sup>f</sup> C <sub>4</sub> H <sub>2</sub> O <sub>4</sub> <sup>2-</sup>  | C <sub>1</sub> | BVP86 | UAKS    | -454.73231 | 33.51 (0) | 5.34 | 90.12 | -202.48 |
| <sup>f</sup> HC <sub>4</sub> H <sub>2</sub> O <sub>4</sub> <sup>-</sup>  | C <sub>s</sub> | BVP86 | UAKS    | -455.44797 | 40.36 (0) | 5.02 | 84.40 | -53.01  |
| <sup>f</sup> H <sub>2</sub> C <sub>4</sub> H <sub>2</sub> O <sub>4</sub> | C <sub>s</sub> | BVP86 | UAKS    | -455.95959 | 50.39 (0) | 5.22 | 86.40 | -11.71  |
| <sup>f</sup> C <sub>4</sub> H <sub>2</sub> O <sub>4</sub> <sup>2-</sup>  | C <sub>1</sub> | BVP86 | Pauling | -454.73231 | 33.51 (0) | 5.34 | 90.12 | -206.32 |
| <sup>f</sup> HC <sub>4</sub> H <sub>2</sub> O <sub>4</sub> <sup>-</sup>  | C <sub>s</sub> | BVP86 | Pauling | -455.44797 | 40.36 (0) | 5.02 | 84.40 | -58.16  |
| <sup>f</sup> H <sub>2</sub> C <sub>4</sub> H <sub>2</sub> O <sub>4</sub> | C <sub>s</sub> | BVP86 | Pauling | -455.95959 | 50.39 (0) | 5.22 | 86.40 | -17.00  |
| <sup>f</sup> C <sub>4</sub> H <sub>2</sub> O <sub>4</sub> <sup>2-</sup>  | C <sub>1</sub> | BVP86 | Klamt   | -454.73231 | 33.51 (0) | 5.34 | 90.12 | -193.88 |

|                                                |              |       |         |            |           |      |       |         |
|------------------------------------------------|--------------|-------|---------|------------|-----------|------|-------|---------|
| ${}^f\text{HC}_4\text{H}_2\text{O}_4^-$        | $\text{C}_s$ | BVP86 | Klamt   | -455.44797 | 40.36 (0) | 5.02 | 84.40 | -50.14  |
| ${}^f\text{H}_2\text{C}_4\text{H}_2\text{O}_4$ | $\text{C}_s$ | BVP86 | Klamt   | -455.95959 | 50.39 (0) | 5.22 | 86.40 | -6.61   |
| ${}^f\text{C}_4\text{H}_2\text{O}_4^{2-}$      | $\text{C}_1$ | BVP86 | SMD     | -454.73231 | 33.51 (0) | 5.34 | 90.12 | -202.23 |
| ${}^f\text{HC}_4\text{H}_2\text{O}_4^-$        | $\text{C}_s$ | BVP86 | SMD     | -455.44797 | 40.36 (0) | 5.02 | 84.40 | -52.97  |
| ${}^f\text{H}_2\text{C}_4\text{H}_2\text{O}_4$ | $\text{C}_s$ | BVP86 | SMD     | -455.95959 | 50.39 (0) | 5.22 | 86.40 | -10.36  |
| ${}^f\text{C}_4\text{H}_2\text{O}_4^{2-}$      | $\text{C}_1$ | M052X | UFF     | -454.64572 | 35.86 (0) | 5.17 | 88.47 | -197.63 |
| ${}^f\text{HC}_4\text{H}_2\text{O}_4^-$        | $\text{C}_s$ | M052X | UFF     | -455.36428 | 42.95 (0) | 4.85 | 83.43 | -51.63  |
| ${}^f\text{H}_2\text{C}_4\text{H}_2\text{O}_4$ | $\text{C}_s$ | M052X | UFF     | -455.87459 | 53.06 (0) | 5.11 | 85.80 | -5.80   |
| ${}^f\text{C}_4\text{H}_2\text{O}_4^{2-}$      | $\text{C}_1$ | M052X | UAKS    | -454.64572 | 35.86 (0) | 5.17 | 88.47 | -208.90 |
| ${}^f\text{HC}_4\text{H}_2\text{O}_4^-$        | $\text{C}_s$ | M052X | UAKS    | -455.36428 | 42.95 (0) | 4.85 | 83.43 | -55.09  |
| ${}^f\text{H}_2\text{C}_4\text{H}_2\text{O}_4$ | $\text{C}_s$ | M052X | UAKS    | -455.87459 | 53.06 (0) | 5.11 | 85.80 | -12.81  |
| ${}^f\text{C}_4\text{H}_2\text{O}_4^{2-}$      | $\text{C}_1$ | M052X | Pauling | -454.64572 | 35.86 (0) | 5.17 | 88.47 | -214.97 |
| ${}^f\text{HC}_4\text{H}_2\text{O}_4^-$        | $\text{C}_s$ | M052X | Pauling | -455.36428 | 42.95 (0) | 4.85 | 83.43 | -62.34  |
| ${}^f\text{H}_2\text{C}_4\text{H}_2\text{O}_4$ | $\text{C}_s$ | M052X | Pauling | -455.87459 | 53.06 (0) | 5.11 | 85.80 | -19.99  |
| ${}^f\text{C}_4\text{H}_2\text{O}_4^{2-}$      | $\text{C}_1$ | M052X | Klamt   | -454.64572 | 35.86 (0) | 5.17 | 88.47 | -199.75 |
| ${}^f\text{HC}_4\text{H}_2\text{O}_4^-$        | $\text{C}_s$ | M052X | Klamt   | -455.36428 | 42.95 (0) | 4.85 | 83.43 | -52.42  |
| ${}^f\text{H}_2\text{C}_4\text{H}_2\text{O}_4$ | $\text{C}_s$ | M052X | Klamt   | -455.87459 | 53.06 (0) | 5.11 | 85.80 | -7.99   |
| ${}^f\text{C}_4\text{H}_2\text{O}_4^{2-}$      | $\text{C}_1$ | M052X | SMD     | -454.64572 | 35.86 (0) | 5.17 | 88.47 | -209.36 |
| ${}^f\text{HC}_4\text{H}_2\text{O}_4^-$        | $\text{C}_s$ | M052X | SMD     | -455.36428 | 42.95 (0) | 4.85 | 83.43 | -55.61  |
| ${}^f\text{H}_2\text{C}_4\text{H}_2\text{O}_4$ | $\text{C}_s$ | M052X | SMD     | -455.87459 | 53.06 (0) | 5.11 | 85.80 | -11.75  |
| $\text{C}_4\text{H}_5\text{NO}_4^{2-}$         | $\text{C}_s$ | B3LYP | UFF     | -511.31958 | 60.04 (0) | 6.19 | 96.24 | -177.96 |
| $\text{HC}_4\text{H}_5\text{NO}_4^-$           | $\text{C}_1$ | B3LYP | UFF     | -511.99740 | 67.95 (0) | 5.99 | 93.33 | -50.09  |
| $\text{H}_2\text{C}_4\text{H}_5\text{NO}_4$    | $\text{C}_s$ | B3LYP | UFF     | -512.51258 | 77.46 (0) | 6.36 | 96.68 | -9.66   |
| $\text{C}_4\text{H}_5\text{NO}_4^{2-}$         | $\text{C}_s$ | B3LYP | UAKS    | -511.31958 | 60.04 (0) | 6.19 | 96.24 | -193.69 |
| $\text{HC}_4\text{H}_5\text{NO}_4^-$           | $\text{C}_1$ | B3LYP | UAKS    | -511.99740 | 67.95 (0) | 5.99 | 93.33 | -62.19  |
| $\text{H}_2\text{C}_4\text{H}_5\text{NO}_4$    | $\text{C}_s$ | B3LYP | UAKS    | -512.51258 | 77.46 (0) | 6.36 | 96.68 | -24.53  |
| $\text{C}_4\text{H}_5\text{NO}_4^{2-}$         | $\text{C}_s$ | B3LYP | Pauling | -511.31958 | 60.04 (0) | 6.19 | 96.24 | -194.77 |
| $\text{HC}_4\text{H}_5\text{NO}_4^-$           | $\text{C}_1$ | B3LYP | Pauling | -511.99740 | 67.95 (0) | 5.99 | 93.33 | -62.26  |
| $\text{H}_2\text{C}_4\text{H}_5\text{NO}_4$    | $\text{C}_s$ | B3LYP | Pauling | -512.51258 | 77.46 (0) | 6.36 | 96.68 | -23.87  |
| $\text{C}_4\text{H}_5\text{NO}_4^{2-}$         | $\text{C}_s$ | B3LYP | Klamt   | -511.31958 | 60.04 (0) | 6.19 | 96.24 | -180.79 |
| $\text{HC}_4\text{H}_5\text{NO}_4^-$           | $\text{C}_1$ | B3LYP | Klamt   | -511.99740 | 67.95 (0) | 5.99 | 93.33 | -52.52  |
| $\text{H}_2\text{C}_4\text{H}_5\text{NO}_4$    | $\text{C}_s$ | B3LYP | Klamt   | -512.51258 | 77.46 (0) | 6.36 | 96.68 | -13.65  |
| $\text{C}_4\text{H}_5\text{NO}_4^{2-}$         | $\text{C}_s$ | B3LYP | SMD     | -511.31958 | 60.04 (0) | 6.19 | 96.24 | -191.89 |
| $\text{HC}_4\text{H}_5\text{NO}_4^-$           | $\text{C}_1$ | B3LYP | SMD     | -511.99740 | 67.95 (0) | 5.99 | 93.33 | -60.06  |
| $\text{H}_2\text{C}_4\text{H}_5\text{NO}_4$    | $\text{C}_s$ | B3LYP | SMD     | -512.51258 | 77.46 (0) | 6.36 | 96.68 | -19.63  |
| $\text{C}_4\text{H}_5\text{NO}_4^{2-}$         | $\text{C}_s$ | PBE   | UFF     | -510.75819 | 57.98 (0) | 6.30 | 96.90 | -175.66 |
| $\text{HC}_4\text{H}_5\text{NO}_4^-$           | $\text{C}_1$ | PBE   | UFF     | -511.43550 | 64.51 (0) | 6.27 | 97.00 | -48.74  |
| $\text{H}_2\text{C}_4\text{H}_5\text{NO}_4$    | $\text{C}_s$ | PBE   | UFF     | -511.94703 | 75.03 (0) | 6.44 | 97.16 | -6.32   |
| $\text{C}_4\text{H}_5\text{NO}_4^{2-}$         | $\text{C}_s$ | PBE   | UAKS    | -510.75819 | 57.98 (0) | 6.30 | 96.90 | -190.95 |
| $\text{HC}_4\text{H}_5\text{NO}_4^-$           | $\text{C}_1$ | PBE   | UAKS    | -511.43550 | 64.51 (0) | 6.27 | 97.00 | -61.25  |
| $\text{H}_2\text{C}_4\text{H}_5\text{NO}_4$    | $\text{C}_s$ | PBE   | UAKS    | -511.94703 | 75.03 (0) | 6.44 | 97.16 | -23.85  |
| $\text{C}_4\text{H}_5\text{NO}_4^{2-}$         | $\text{C}_s$ | PBE   | Pauling | -510.75819 | 57.98 (0) | 6.30 | 96.90 | -190.35 |
| $\text{HC}_4\text{H}_5\text{NO}_4^-$           | $\text{C}_1$ | PBE   | Pauling | -511.43550 | 64.51 (0) | 6.27 | 97.00 | -58.89  |
| $\text{H}_2\text{C}_4\text{H}_5\text{NO}_4$    | $\text{C}_s$ | PBE   | Pauling | -511.94703 | 75.03 (0) | 6.44 | 97.16 | -21.44  |
| $\text{C}_4\text{H}_5\text{NO}_4^{2-}$         | $\text{C}_s$ | PBE   | Klamt   | -510.75819 | 57.98 (0) | 6.30 | 96.90 | -179.34 |
| $\text{HC}_4\text{H}_5\text{NO}_4^-$           | $\text{C}_1$ | PBE   | Klamt   | -511.43550 | 64.51 (0) | 6.27 | 97.00 | -51.12  |
| $\text{H}_2\text{C}_4\text{H}_5\text{NO}_4$    | $\text{C}_s$ | PBE   | Klamt   | -511.94703 | 75.03 (0) | 6.44 | 97.16 | -11.68  |

|                                                              |                |       |         |            |           |      |        |         |
|--------------------------------------------------------------|----------------|-------|---------|------------|-----------|------|--------|---------|
| C <sub>4</sub> H <sub>5</sub> NO <sub>4</sub> <sup>2-</sup>  | C <sub>s</sub> | PBE   | SMD     | -510.75819 | 57.98 (0) | 6.30 | 96.90  | -188.50 |
| HC <sub>4</sub> H <sub>5</sub> NO <sub>4</sub> <sup>-</sup>  | C <sub>1</sub> | PBE   | SMD     | -511.43550 | 64.51 (0) | 6.27 | 97.00  | -57.81  |
| H <sub>2</sub> C <sub>4</sub> H <sub>5</sub> NO <sub>4</sub> | C <sub>s</sub> | PBE   | SMD     | -511.94703 | 75.03 (0) | 6.44 | 97.16  | -18.11  |
| C <sub>4</sub> H <sub>5</sub> NO <sub>4</sub> <sup>2-</sup>  | C <sub>s</sub> | BVP86 | UFF     | -511.36030 | 57.89 (0) | 6.31 | 97.01  | -176.49 |
| HC <sub>4</sub> H <sub>5</sub> NO <sub>4</sub> <sup>-</sup>  | C <sub>1</sub> | BVP86 | UFF     | -512.03865 | 64.48 (0) | 6.26 | 96.94  | -49.14  |
| H <sub>2</sub> C <sub>4</sub> H <sub>5</sub> NO <sub>4</sub> | C <sub>s</sub> | BVP86 | UFF     | -512.55110 | 74.95 (0) | 6.45 | 97.22  | -6.43   |
| C <sub>4</sub> H <sub>5</sub> NO <sub>4</sub> <sup>2-</sup>  | C <sub>s</sub> | BVP86 | UAKS    | -511.36030 | 57.89 (0) | 6.31 | 97.01  | -191.87 |
| HC <sub>4</sub> H <sub>5</sub> NO <sub>4</sub> <sup>-</sup>  | C <sub>1</sub> | BVP86 | UAKS    | -512.03865 | 64.48 (0) | 6.26 | 96.94  | -61.09  |
| H <sub>2</sub> C <sub>4</sub> H <sub>5</sub> NO <sub>4</sub> | C <sub>s</sub> | BVP86 | UAKS    | -512.55110 | 74.95 (0) | 6.45 | 97.22  | -23.73  |
| C <sub>4</sub> H <sub>5</sub> NO <sub>4</sub> <sup>2-</sup>  | C <sub>s</sub> | BVP86 | Pauling | -511.36030 | 57.89 (0) | 6.31 | 97.01  | -191.50 |
| HC <sub>4</sub> H <sub>5</sub> NO <sub>4</sub> <sup>-</sup>  | C <sub>1</sub> | BVP86 | Pauling | -512.03865 | 64.48 (0) | 6.26 | 96.94  | -59.58  |
| H <sub>2</sub> C <sub>4</sub> H <sub>5</sub> NO <sub>4</sub> | C <sub>s</sub> | BVP86 | Pauling | -512.55110 | 74.95 (0) | 6.45 | 97.22  | -21.65  |
| C <sub>4</sub> H <sub>5</sub> NO <sub>4</sub> <sup>2-</sup>  | C <sub>s</sub> | BVP86 | Klamt   | -511.36030 | 57.89 (0) | 6.31 | 97.01  | -179.49 |
| HC <sub>4</sub> H <sub>5</sub> NO <sub>4</sub> <sup>-</sup>  | C <sub>1</sub> | BVP86 | Klamt   | -512.03865 | 64.48 (0) | 6.26 | 96.94  | -51.51  |
| H <sub>2</sub> C <sub>4</sub> H <sub>5</sub> NO <sub>4</sub> | C <sub>s</sub> | BVP86 | Klamt   | -512.55110 | 74.95 (0) | 6.45 | 97.22  | -9.56   |
| C <sub>4</sub> H <sub>5</sub> NO <sub>4</sub> <sup>2-</sup>  | C <sub>s</sub> | BVP86 | SMD     | -511.36030 | 57.89 (0) | 6.31 | 97.01  | -189.57 |
| HC <sub>4</sub> H <sub>5</sub> NO <sub>4</sub> <sup>-</sup>  | C <sub>1</sub> | BVP86 | SMD     | -512.03865 | 64.48 (0) | 6.26 | 96.94  | -58.32  |
| H <sub>2</sub> C <sub>4</sub> H <sub>5</sub> NO <sub>4</sub> | C <sub>s</sub> | BVP86 | SMD     | -512.55110 | 74.95 (0) | 6.45 | 97.22  | -18.23  |
| C <sub>4</sub> H <sub>5</sub> NO <sub>4</sub> <sup>2-</sup>  | C <sub>s</sub> | M052X | UFF     | -511.26718 | 61.72 (0) | 6.09 | 95.49  | -182.76 |
| HC <sub>4</sub> H <sub>5</sub> NO <sub>4</sub> <sup>-</sup>  | C <sub>1</sub> | M052X | UFF     | -511.26096 | 86.50 (0) | 6.76 | 98.96  | -50.68  |
| H <sub>2</sub> C <sub>4</sub> H <sub>5</sub> NO <sub>4</sub> | C <sub>s</sub> | M052X | UFF     | -512.45762 | 79.16 (0) | 6.28 | 96.17  | -10.77  |
| C <sub>4</sub> H <sub>5</sub> NO <sub>4</sub> <sup>2-</sup>  | C <sub>s</sub> | M052X | UAKS    | -511.26718 | 61.72 (0) | 6.09 | 95.49  | -198.27 |
| HC <sub>4</sub> H <sub>5</sub> NO <sub>4</sub> <sup>-</sup>  | C <sub>1</sub> | M052X | UAKS    | -511.26096 | 86.50 (0) | 6.76 | 98.96  | -62.13  |
| H <sub>2</sub> C <sub>4</sub> H <sub>5</sub> NO <sub>4</sub> | C <sub>s</sub> | M052X | UAKS    | -512.45762 | 79.16 (0) | 6.28 | 96.17  | -26.22  |
| C <sub>4</sub> H <sub>5</sub> NO <sub>4</sub> <sup>2-</sup>  | C <sub>s</sub> | M052X | Pauling | -511.26718 | 61.72 (0) | 6.09 | 95.49  | -200.65 |
| HC <sub>4</sub> H <sub>5</sub> NO <sub>4</sub> <sup>-</sup>  | C <sub>1</sub> | M052X | Pauling | -511.26096 | 86.50 (0) | 6.76 | 98.96  | -60.68  |
| H <sub>2</sub> C <sub>4</sub> H <sub>5</sub> NO <sub>4</sub> | C <sub>s</sub> | M052X | Pauling | -512.45762 | 79.16 (0) | 6.28 | 96.17  | -25.11  |
| C <sub>4</sub> H <sub>5</sub> NO <sub>4</sub> <sup>2-</sup>  | C <sub>s</sub> | M052X | Klamt   | -511.26718 | 61.72 (0) | 6.09 | 95.49  | -184.65 |
| HC <sub>4</sub> H <sub>5</sub> NO <sub>4</sub> <sup>-</sup>  | C <sub>1</sub> | M052X | Klamt   | -511.26096 | 86.50 (0) | 6.76 | 98.96  | -53.57  |
| H <sub>2</sub> C <sub>4</sub> H <sub>5</sub> NO <sub>4</sub> | C <sub>s</sub> | M052X | Klamt   | -512.45762 | 79.16 (0) | 6.28 | 96.17  | -13.85  |
| C <sub>4</sub> H <sub>5</sub> NO <sub>4</sub> <sup>2-</sup>  | C <sub>s</sub> | M052X | SMD     | -511.26718 | 61.72 (0) | 6.09 | 95.49  | -196.70 |
| HC <sub>4</sub> H <sub>5</sub> NO <sub>4</sub> <sup>-</sup>  | C <sub>1</sub> | M052X | SMD     | -511.26096 | 69.72 (0) | 6.76 | 98.96  | -60.80  |
| H <sub>2</sub> C <sub>4</sub> H <sub>5</sub> NO <sub>4</sub> | C <sub>s</sub> | M052X | SMD     | -512.45762 | 79.16 (0) | 6.28 | 96.17  | -21.02  |
| C <sub>5</sub> H <sub>7</sub> NO <sub>4</sub> <sup>2-</sup>  | C <sub>s</sub> | B3LYP | UFF     | -550.63401 | 77.22 (0) | 6.95 | 101.50 | -174.92 |
| HC <sub>5</sub> H <sub>7</sub> NO <sub>4</sub> <sup>-</sup>  | C <sub>1</sub> | B3LYP | UFF     | -551.31529 | 84.72 (0) | 6.90 | 99.42  | -48.63  |
| H <sub>2</sub> C <sub>5</sub> H <sub>7</sub> NO <sub>4</sub> | C <sub>s</sub> | B3LYP | UFF     | -551.83209 | 94.70 (0) | 7.15 | 101.51 | -6.66   |
| C <sub>5</sub> H <sub>7</sub> NO <sub>4</sub> <sup>2-</sup>  | C <sub>s</sub> | B3LYP | UAKS    | -550.63401 | 77.22 (0) | 6.95 | 101.48 | -190.50 |
| HC <sub>5</sub> H <sub>7</sub> NO <sub>4</sub> <sup>-</sup>  | C <sub>1</sub> | B3LYP | UAKS    | -551.31529 | 84.72 (0) | 6.90 | 99.42  | -59.89  |
| H <sub>2</sub> C <sub>5</sub> H <sub>7</sub> NO <sub>4</sub> | C <sub>s</sub> | B3LYP | UAKS    | -551.83209 | 94.70 (0) | 7.15 | 101.51 | -20.16  |
| C <sub>5</sub> H <sub>7</sub> NO <sub>4</sub> <sup>2-</sup>  | C <sub>s</sub> | B3LYP | Pauling | -550.63401 | 77.22 (0) | 6.95 | 101.48 | -190.62 |
| HC <sub>5</sub> H <sub>7</sub> NO <sub>4</sub> <sup>-</sup>  | C <sub>1</sub> | B3LYP | Pauling | -551.31529 | 84.72 (0) | 6.90 | 99.42  | -58.97  |
| H <sub>2</sub> C <sub>5</sub> H <sub>7</sub> NO <sub>4</sub> | C <sub>s</sub> | B3LYP | Pauling | -551.83209 | 94.70 (0) | 7.15 | 101.51 | -19.08  |
| C <sub>5</sub> H <sub>7</sub> NO <sub>4</sub> <sup>2-</sup>  | C <sub>s</sub> | B3LYP | Klamt   | -550.63401 | 77.22 (0) | 6.95 | 101.48 | -177.61 |
| HC <sub>5</sub> H <sub>7</sub> NO <sub>4</sub> <sup>-</sup>  | C <sub>1</sub> | B3LYP | Klamt   | -551.31529 | 84.72 (0) | 6.90 | 99.43  | -51.65  |
| H <sub>2</sub> C <sub>5</sub> H <sub>7</sub> NO <sub>4</sub> | C <sub>s</sub> | B3LYP | Klamt   | -551.83209 | 94.70 (0) | 7.15 | 101.51 | -10.69  |
| C <sub>5</sub> H <sub>7</sub> NO <sub>4</sub> <sup>2-</sup>  | C <sub>s</sub> | B3LYP | SMD     | -550.63401 | 77.22 (0) | 6.95 | 101.48 | -189.73 |
| HC <sub>5</sub> H <sub>7</sub> NO <sub>4</sub> <sup>-</sup>  | C <sub>1</sub> | B3LYP | SMD     | -551.31529 | 84.72 (0) | 6.90 | 99.43  | -58.62  |

|                                             |              |       |         |             |           |      |        |         |
|---------------------------------------------|--------------|-------|---------|-------------|-----------|------|--------|---------|
| $\text{H}_2\text{C}_5\text{H}_7\text{NO}_4$ | $\text{C}_s$ | B3LYP | SMD     | -551.83209  | 94.70 (0) | 7.15 | 101.51 | -18.26  |
| $\text{C}_5\text{H}_7\text{NO}_4^{2-}$      | $\text{C}_s$ | PBE   | UFF     | -550.01612  | 74.64 (0) | 7.07 | 102.10 | -171.95 |
| $\text{HC}_5\text{H}_7\text{NO}_4^-$        | $\text{C}_1$ | PBE   | UFF     | -550.69556  | 81.20 (0) | 7.11 | 100.75 | -47.17  |
| $\text{H}_2\text{C}_5\text{H}_7\text{NO}_4$ | $\text{C}_s$ | PBE   | UFF     | -551.20871  | 91.72 (0) | 7.26 | 102.13 | -3.82   |
| $\text{C}_5\text{H}_7\text{NO}_4^{2-}$      | $\text{C}_s$ | PBE   | UAKS    | -550.01612  | 74.64 (0) | 7.07 | 102.10 | -187.42 |
| $\text{HC}_5\text{H}_7\text{NO}_4^-$        | $\text{C}_1$ | PBE   | UAKS    | -550.69556  | 81.20 (0) | 7.11 | 100.75 | -58.46  |
| $\text{H}_2\text{C}_5\text{H}_7\text{NO}_4$ | $\text{C}_s$ | PBE   | UAKS    | -551.20871  | 91.72 (0) | 7.26 | 102.13 | -19.48  |
| $\text{C}_5\text{H}_7\text{NO}_4^{2-}$      | $\text{C}_s$ | PBE   | Pauling | -550.01612  | 74.64 (0) | 7.07 | 102.10 | -186.03 |
| $\text{HC}_5\text{H}_7\text{NO}_4^-$        | $\text{C}_1$ | PBE   | Pauling | -550.69556  | 81.20 (0) | 7.11 | 100.75 | -55.63  |
| $\text{H}_2\text{C}_5\text{H}_7\text{NO}_4$ | $\text{C}_s$ | PBE   | Pauling | -551.20871  | 91.72 (0) | 7.26 | 102.13 | -16.61  |
| $\text{C}_5\text{H}_7\text{NO}_4^{2-}$      | $\text{C}_s$ | PBE   | Klamt   | -550.01612  | 74.64 (0) | 7.07 | 102.10 | -174.51 |
| $\text{HC}_5\text{H}_7\text{NO}_4^-$        | $\text{C}_1$ | PBE   | Klamt   | -550.69556  | 81.20 (0) | 7.11 | 100.75 | -49.87  |
| $\text{H}_2\text{C}_5\text{H}_7\text{NO}_4$ | $\text{C}_s$ | PBE   | Klamt   | -551.20871  | 91.72 (0) | 7.26 | 102.13 | -7.07   |
| $\text{C}_5\text{H}_7\text{NO}_4^{2-}$      | $\text{C}_s$ | PBE   | SMD     | -550.01612  | 74.64 (0) | 7.07 | 102.10 | -185.82 |
| $\text{HC}_5\text{H}_7\text{NO}_4^-$        | $\text{C}_1$ | PBE   | SMD     | -550.69556  | 81.20 (0) | 7.11 | 100.75 | -56.34  |
| $\text{H}_2\text{C}_5\text{H}_7\text{NO}_4$ | $\text{C}_s$ | PBE   | SMD     | -551.20871  | 91.72 (0) | 7.26 | 102.13 | -16.63  |
| $\text{C}_5\text{H}_7\text{NO}_4^{2-}$      | $\text{C}_s$ | BVP86 | UFF     | -550.67512  | 74.55 (0) | 7.07 | 102.10 | -172.71 |
| $\text{HC}_5\text{H}_7\text{NO}_4^-$        | $\text{C}_1$ | BVP86 | UFF     | -551.35567  | 81.10 (0) | 7.13 | 100.93 | -47.53  |
| $\text{H}_2\text{C}_5\text{H}_7\text{NO}_4$ | $\text{C}_s$ | BVP86 | UFF     | -551.86969  | 91.64 (0) | 7.27 | 102.22 | -3.72   |
| $\text{C}_5\text{H}_7\text{NO}_4^{2-}$      | $\text{C}_s$ | BVP86 | UAKS    | -550.67512  | 74.55 (0) | 7.07 | 102.10 | -188.17 |
| $\text{HC}_5\text{H}_7\text{NO}_4^-$        | $\text{C}_1$ | BVP86 | UAKS    | -551.35567  | 81.10 (0) | 7.13 | 100.93 | -58.65  |
| $\text{H}_2\text{C}_5\text{H}_7\text{NO}_4$ | $\text{C}_s$ | BVP86 | UAKS    | -551.86969  | 91.64 (0) | 7.27 | 102.22 | -19.35  |
| $\text{C}_5\text{H}_7\text{NO}_4^{2-}$      | $\text{C}_s$ | BVP86 | Pauling | -550.67512  | 74.55 (0) | 7.07 | 102.10 | -187.48 |
| $\text{HC}_5\text{H}_7\text{NO}_4^-$        | $\text{C}_1$ | BVP86 | Pauling | -551.35567  | 81.10 (0) | 7.13 | 100.93 | -56.29  |
| $\text{H}_2\text{C}_5\text{H}_7\text{NO}_4$ | $\text{C}_s$ | BVP86 | Pauling | -551.86969  | 91.64 (0) | 7.27 | 102.22 | -16.85  |
| $\text{C}_5\text{H}_7\text{NO}_4^{2-}$      | $\text{C}_s$ | BVP86 | Klamt   | -550.67512  | 74.55 (0) | 7.07 | 102.10 | -175.34 |
| $\text{HC}_5\text{H}_7\text{NO}_4^-$        | $\text{C}_1$ | BVP86 | Klamt   | -551.35567  | 81.10 (0) | 7.13 | 100.93 | -50.25  |
| $\text{H}_2\text{C}_5\text{H}_7\text{NO}_4$ | $\text{C}_s$ | BVP86 | Klamt   | -551.86969  | 91.64 (0) | 7.27 | 102.22 | -7.14   |
| $\text{C}_5\text{H}_7\text{NO}_4^{2-}$      | $\text{C}_s$ | BVP86 | SMD     | -550.67512  | 74.55 (0) | 7.07 | 102.10 | -186.98 |
| $\text{HC}_5\text{H}_7\text{NO}_4^-$        | $\text{C}_1$ | BVP86 | SMD     | -551.35567  | 81.10 (0) | 7.13 | 100.93 | -56.86  |
| $\text{H}_2\text{C}_5\text{H}_7\text{NO}_4$ | $\text{C}_s$ | BVP86 | SMD     | -551.86969  | 91.64 (0) | 7.27 | 102.22 | -16.72  |
| $\text{C}_5\text{H}_7\text{NO}_4^{2-}$      | $\text{C}_s$ | M052X | UFF     | -550.57799  | 79.45 (0) | 6.76 | 99.69  | -179.41 |
| $\text{HC}_5\text{H}_7\text{NO}_4^-$        | $\text{C}_1$ | M052X | UFF     | -551.22543  | 87.64 (0) | 6.99 | 101.18 | -61.92  |
| $\text{H}_2\text{C}_5\text{H}_7\text{NO}_4$ | $\text{C}_s$ | M052X | UFF     | -551.77530  | 96.85 (0) | 7.00 | 100.27 | -7.67   |
| $\text{C}_5\text{H}_7\text{NO}_4^{2-}$      | $\text{C}_s$ | M052X | UAKS    | -550.57799  | 79.45 (0) | 6.76 | 99.69  | -196.07 |
| $\text{HC}_5\text{H}_7\text{NO}_4^-$        | $\text{C}_1$ | M052X | UAKS    | -551.22543  | 87.64 (0) | 6.99 | 101.18 | -78.94  |
| $\text{H}_2\text{C}_5\text{H}_7\text{NO}_4$ | $\text{C}_s$ | M052X | UAKS    | -551.77530  | 96.85 (0) | 7.00 | 100.27 | -21.81  |
| $\text{C}_5\text{H}_7\text{NO}_4^{2-}$      | $\text{C}_s$ | M052X | Pauling | -550.57799  | 79.45 (0) | 6.76 | 99.69  | -197.50 |
| $\text{HC}_5\text{H}_7\text{NO}_4^-$        | $\text{C}_1$ | M052X | Pauling | -551.22543  | 87.64 (0) | 6.99 | 101.18 | -77.08  |
| $\text{H}_2\text{C}_5\text{H}_7\text{NO}_4$ | $\text{C}_s$ | M052X | Pauling | -551.77530  | 96.85 (0) | 7.00 | 100.27 | -20.32  |
| $\text{C}_5\text{H}_7\text{NO}_4^{2-}$      | $\text{C}_s$ | M052X | Klamt   | -550.57799  | 79.45 (0) | 6.76 | 99.69  | -182.33 |
| $\text{HC}_5\text{H}_7\text{NO}_4^-$        | $\text{C}_1$ | M052X | Klamt   | -551.22543  | 87.64 (0) | 6.99 | 101.18 | -65.47  |
| $\text{H}_2\text{C}_5\text{H}_7\text{NO}_4$ | $\text{C}_s$ | M052X | Klamt   | -551.77530  | 96.85 (0) | 7.00 | 100.27 | -10.87  |
| $\text{C}_5\text{H}_7\text{NO}_4^{2-}$      | $\text{C}_s$ | M052X | SMD     | -550.57799  | 79.45 (0) | 6.76 | 99.69  | -195.59 |
| $\text{HC}_5\text{H}_7\text{NO}_4^-$        | $\text{C}_1$ | M052X | SMD     | -551.22543  | 87.64 (0) | 6.99 | 101.18 | -76.12  |
| $\text{H}_2\text{C}_5\text{H}_7\text{NO}_4$ | $\text{C}_s$ | M052X | SMD     | -551.77530  | 96.85 (0) | 7.00 | 100.27 | -19.48  |
| $\text{Fe}(\text{CO})_4^{2-}$               | $\text{T}_d$ | B3LYP | UFF     | -1717.31851 | 19.60 (0) | 6.54 | 95.44  | -171.07 |

|                                     |                 |       |         |             |          |      |       |         |
|-------------------------------------|-----------------|-------|---------|-------------|----------|------|-------|---------|
| HFe (CO) <sub>4</sub> <sup>-</sup>  | C <sub>3v</sub> | B3LYP | UFF     | -1718.02018 | 25.12(0) | 6.71 | 97.67 | -33.92  |
| H <sub>2</sub> Fe (CO) <sub>4</sub> | C <sub>2v</sub> | B3LYP | UFF     | -1718.53458 | 30.96(0) | 6.85 | 98.33 | 8.18    |
| Fe (CO) <sub>4</sub> <sup>2-</sup>  | T <sub>d</sub>  | B3LYP | UAKS    | -1717.31851 | 19.60(0) | 6.54 | 95.44 | -173.68 |
| HFe (CO) <sub>4</sub> <sup>-</sup>  | C <sub>3v</sub> | B3LYP | UAKS    | -1718.02018 | 25.12(0) | 6.71 | 97.67 | -36.87  |
| H <sub>2</sub> Fe (CO) <sub>4</sub> | C <sub>2v</sub> | B3LYP | UAKS    | -1718.53458 | 30.96(0) | 6.85 | 98.33 | 5.88    |
| Fe (CO) <sub>4</sub> <sup>2-</sup>  | T <sub>d</sub>  | B3LYP | Pauling | -1717.31851 | 19.60(0) | 6.54 | 95.44 | -176.58 |
| HFe (CO) <sub>4</sub> <sup>-</sup>  | C <sub>3v</sub> | B3LYP | Pauling | -1718.02018 | 25.12(0) | 6.71 | 97.67 | -37.99  |
| H <sub>2</sub> Fe (CO) <sub>4</sub> | C <sub>2v</sub> | B3LYP | Pauling | -1718.53458 | 30.96(0) | 6.85 | 98.33 | -2.19   |
| Fe (CO) <sub>4</sub> <sup>2-</sup>  | T <sub>d</sub>  | B3LYP | Klamt   | -1717.31851 | 19.60(0) | 6.54 | 95.44 | -170.42 |
| HFe (CO) <sub>4</sub> <sup>-</sup>  | C <sub>3v</sub> | B3LYP | Klamt   | -1718.02018 | 25.12(0) | 6.71 | 97.67 | -34.46  |
| H <sub>2</sub> Fe (CO) <sub>4</sub> | C <sub>2v</sub> | B3LYP | Klamt   | -1718.53458 | 30.96(0) | 6.85 | 98.33 | 7.93    |
| Fe (CO) <sub>4</sub> <sup>2-</sup>  | T <sub>d</sub>  | PBE   | UFF     | -1716.65700 | 18.99(0) | 6.66 | 96.88 | -170.59 |
| HFe (CO) <sub>4</sub> <sup>-</sup>  | C <sub>3v</sub> | PBE   | UFF     | -1717.34756 | 24.50(0) | 6.82 | 98.73 | -33.48  |
| H <sub>2</sub> Fe (CO) <sub>4</sub> | C <sub>2v</sub> | PBE   | UFF     | -1717.85016 | 30.17(0) | 6.94 | 99.21 | 8.66    |
| Fe (CO) <sub>4</sub> <sup>2-</sup>  | T <sub>d</sub>  | PBE   | UAKS    | -1716.65700 | 18.99(0) | 6.66 | 96.88 | -173.40 |
| HFe (CO) <sub>4</sub> <sup>-</sup>  | C <sub>3v</sub> | PBE   | UAKS    | -1717.34756 | 24.50(0) | 6.82 | 98.73 | -36.64  |
| H <sub>2</sub> Fe (CO) <sub>4</sub> | C <sub>2v</sub> | PBE   | UAKS    | -1717.85016 | 30.17(0) | 6.94 | 99.21 | 6.49    |
| Fe (CO) <sub>4</sub> <sup>2-</sup>  | T <sub>d</sub>  | PBE   | Pauling | -1716.65700 | 18.99(0) | 6.66 | 96.88 | -175.97 |
| HFe (CO) <sub>4</sub> <sup>-</sup>  | C <sub>3v</sub> | PBE   | Pauling | -1717.34756 | 24.50(0) | 6.82 | 98.73 | -37.12  |
| H <sub>2</sub> Fe (CO) <sub>4</sub> | C <sub>2v</sub> | PBE   | Pauling | -1717.85016 | 30.17(0) | 6.94 | 99.21 | 0.01    |
| Fe (CO) <sub>4</sub> <sup>2-</sup>  | T <sub>d</sub>  | PBE   | Klamt   | -1716.65700 | 18.99(0) | 6.66 | 96.88 | -170.25 |
| HFe (CO) <sub>4</sub> <sup>-</sup>  | C <sub>3v</sub> | PBE   | Klamt   | -1717.34756 | 24.50(0) | 6.82 | 98.73 | -34.03  |
| H <sub>2</sub> Fe (CO) <sub>4</sub> | C <sub>2v</sub> | PBE   | Klamt   | -1717.85016 | 30.17(0) | 6.94 | 99.21 | 8.26    |
| Fe (CO) <sub>4</sub> <sup>2-</sup>  | T <sub>d</sub>  | BVP86 | UFF     | -1717.62208 | 19.00(0) | 6.65 | 96.67 | -170.67 |
| HFe (CO) <sub>4</sub> <sup>-</sup>  | C <sub>3v</sub> | BVP86 | UFF     | -1718.31416 | 24.50(0) | 6.80 | 98.53 | -33.64  |
| H <sub>2</sub> Fe (CO) <sub>4</sub> | C <sub>2v</sub> | BVP86 | UFF     | -1718.81793 | 30.21(0) | 6.92 | 99.06 | 8.65    |
| Fe (CO) <sub>4</sub> <sup>2-</sup>  | T <sub>d</sub>  | BVP86 | UAKS    | -1717.62208 | 19.00(0) | 6.65 | 96.67 | -173.68 |
| HFe (CO) <sub>4</sub> <sup>-</sup>  | C <sub>3v</sub> | BVP86 | UAKS    | -1718.31416 | 24.50(0) | 6.80 | 98.53 | -36.78  |
| H <sub>2</sub> Fe (CO) <sub>4</sub> | C <sub>2v</sub> | BVP86 | UAKS    | -1718.81793 | 30.21(0) | 6.92 | 99.06 | 6.49    |
| Fe (CO) <sub>4</sub> <sup>2-</sup>  | T <sub>d</sub>  | BVP86 | Pauling | -1717.62208 | 19.00(0) | 6.65 | 96.67 | -177.02 |
| HFe (CO) <sub>4</sub> <sup>-</sup>  | C <sub>3v</sub> | BVP86 | Pauling | -1718.31416 | 24.50(0) | 6.80 | 98.53 | -37.38  |
| H <sub>2</sub> Fe (CO) <sub>4</sub> | C <sub>2v</sub> | BVP86 | Pauling | -1718.81793 | 30.21(0) | 6.92 | 99.06 | -0.07   |
| Fe (CO) <sub>4</sub> <sup>2-</sup>  | T <sub>d</sub>  | BVP86 | Klamt   | -1717.62208 | 19.00(0) | 6.65 | 96.67 | -169.38 |
| HFe (CO) <sub>4</sub> <sup>-</sup>  | C <sub>3v</sub> | BVP86 | Klamt   | -1718.31416 | 24.50(0) | 6.80 | 98.53 | -34.17  |
| H <sub>2</sub> Fe (CO) <sub>4</sub> | C <sub>2v</sub> | BVP86 | Klamt   | -1718.81793 | 30.21(0) | 6.92 | 99.06 | 8.26    |
| Fe (CO) <sub>4</sub> <sup>2-</sup>  | T <sub>d</sub>  | M052X | UFF     | -1717.03509 | 20.11(0) | 6.46 | 95.10 | -174.87 |
| HFe (CO) <sub>4</sub> <sup>-</sup>  | C <sub>3v</sub> | M052X | UFF     | -1717.74905 | 25.27(0) | 6.74 | 97.93 | -34.90  |
| H <sub>2</sub> Fe (CO) <sub>4</sub> | C <sub>2v</sub> | M052X | UFF     | -1718.27641 | 30.97(0) | 6.98 | 99.20 | 7.47    |
| Fe (CO) <sub>4</sub> <sup>2-</sup>  | T <sub>d</sub>  | M052X | UAKS    | -1717.03509 | 20.11(0) | 6.46 | 95.10 | -177.37 |
| HFe (CO) <sub>4</sub> <sup>-</sup>  | C <sub>3v</sub> | M052X | UAKS    | -1717.74905 | 25.27(0) | 6.74 | 97.93 | -37.73  |
| H <sub>2</sub> Fe (CO) <sub>4</sub> | C <sub>2v</sub> | M052X | UAKS    | -1718.27641 | 30.97(0) | 6.98 | 99.20 | 5.53    |
| Fe (CO) <sub>4</sub> <sup>2-</sup>  | T <sub>d</sub>  | M052X | Pauling | -1717.03509 | 20.11(0) | 6.46 | 95.10 | -182.12 |
| HFe (CO) <sub>4</sub> <sup>-</sup>  | C <sub>3v</sub> | M052X | Pauling | -1717.74905 | 25.27(0) | 6.74 | 97.93 | -39.26  |
| H <sub>2</sub> Fe (CO) <sub>4</sub> | C <sub>2v</sub> | M052X | Pauling | -1718.27641 | 30.97(0) | 6.98 | 99.20 | -2.45   |
| Fe (CO) <sub>4</sub> <sup>2-</sup>  | T <sub>d</sub>  | M052X | Klamt   | -1717.03509 | 20.11(0) | 6.46 | 95.10 | -174.24 |
| HFe (CO) <sub>4</sub> <sup>-</sup>  | C <sub>3v</sub> | M052X | Klamt   | -1717.74905 | 25.27(0) | 6.74 | 97.93 | -35.40  |
| H <sub>2</sub> Fe (CO) <sub>4</sub> | C <sub>2v</sub> | M052X | Klamt   | -1718.27641 | 30.97(0) | 6.98 | 99.20 | 7.31    |

|                                                                          |                 |       |         |             |           |      |       |         |
|--------------------------------------------------------------------------|-----------------|-------|---------|-------------|-----------|------|-------|---------|
| Fe (CO) <sub>4</sub> <sup>2-</sup>                                       | T <sub>d</sub>  | M05   | UFF     | -1717.04526 | 19.63 (0) | 6.62 | 97.35 | -171.44 |
| HFe (CO) <sub>4</sub> <sup>-</sup>                                       | C <sub>3v</sub> | M05   | UFF     | -1717.74609 | 24.85 (0) | 6.89 | 99.52 | -34.04  |
| H <sub>2</sub> Fe (CO) <sub>4</sub>                                      | C <sub>2v</sub> | M05   | UFF     | -1718.25634 | 30.44 (0) | 7.04 | 99.92 | 8.16    |
| Fe (CO) <sub>4</sub> <sup>2-</sup>                                       | T <sub>d</sub>  | M05   | UAKS    | -1717.04526 | 19.63 (0) | 6.62 | 97.35 | -174.33 |
| HFe (CO) <sub>4</sub> <sup>-</sup>                                       | C <sub>3v</sub> | M05   | UAKS    | -1717.74609 | 24.85 (0) | 6.89 | 99.52 | -36.98  |
| H <sub>2</sub> Fe (CO) <sub>4</sub>                                      | C <sub>2v</sub> | M05   | UAKS    | -1718.25634 | 30.44 (0) | 7.04 | 99.92 | 5.83    |
| Fe (CO) <sub>4</sub> <sup>2-</sup>                                       | T <sub>d</sub>  | M05   | Pauling | -1717.04526 | 19.63 (0) | 6.62 | 97.35 | -178.02 |
| HFe (CO) <sub>4</sub> <sup>-</sup>                                       | C <sub>3v</sub> | M05   | Pauling | -1717.74609 | 24.85 (0) | 6.89 | 99.52 | -38.30  |
| H <sub>2</sub> Fe (CO) <sub>4</sub>                                      | C <sub>2v</sub> | M05   | Pauling | -1718.25634 | 30.44 (0) | 7.04 | 99.92 | -1.59   |
| Fe (CO) <sub>4</sub> <sup>2-</sup>                                       | T <sub>d</sub>  | M05   | Klamt   | -1717.04526 | 19.63 (0) | 6.62 | 97.35 | -171.17 |
| HFe (CO) <sub>4</sub> <sup>-</sup>                                       | C <sub>3v</sub> | M05   | Klamt   | -1717.74609 | 24.85 (0) | 6.89 | 99.52 | -34.56  |
| H <sub>2</sub> Fe (CO) <sub>4</sub>                                      | C <sub>2v</sub> | M05   | Klamt   | -1718.25634 | 30.44 (0) | 7.04 | 99.92 | 7.86    |
| <sup>9</sup> C <sub>4</sub> H <sub>2</sub> O <sub>4</sub> <sup>2-</sup>  | C <sub>2h</sub> | B3LYP | UFF     | -454.71679  | 35.18 (0) | 5.20 | 86.48 | -186.21 |
| <sup>9</sup> HC <sub>4</sub> H <sub>2</sub> O <sub>4</sub> <sup>-</sup>  | C <sub>1</sub>  | B3LYP | UFF     | -455.38647  | 43.09 (0) | 5.42 | 89.58 | -55.40  |
| <sup>9</sup> H <sub>2</sub> C <sub>4</sub> H <sub>2</sub> O <sub>4</sub> | C <sub>2h</sub> | B3LYP | UFF     | -455.92879  | 51.76 (0) | 5.44 | 86.98 | -2.79   |
| <sup>9</sup> C <sub>4</sub> H <sub>2</sub> O <sub>4</sub> <sup>2-</sup>  | C <sub>2h</sub> | B3LYP | UAKS    | -454.71679  | 35.18 (0) | 5.20 | 86.48 | -196.75 |
| <sup>9</sup> HC <sub>4</sub> H <sub>2</sub> O <sub>4</sub> <sup>-</sup>  | C <sub>1</sub>  | B3LYP | UAKS    | -455.38647  | 43.09 (0) | 5.42 | 89.58 | -65.19  |
| <sup>9</sup> H <sub>2</sub> C <sub>4</sub> H <sub>2</sub> O <sub>4</sub> | C <sub>2h</sub> | B3LYP | UAKS    | -455.92879  | 51.76 (0) | 5.44 | 86.98 | -12.52  |
| <sup>9</sup> C <sub>4</sub> H <sub>2</sub> O <sub>4</sub> <sup>2-</sup>  | C <sub>2h</sub> | B3LYP | Pauling | -454.71679  | 35.18 (0) | 5.20 | 86.48 | -201.58 |
| <sup>9</sup> HC <sub>4</sub> H <sub>2</sub> O <sub>4</sub> <sup>-</sup>  | C <sub>1</sub>  | B3LYP | Pauling | -455.38647  | 43.09 (0) | 5.42 | 89.58 | -68.64  |
| <sup>9</sup> H <sub>2</sub> C <sub>4</sub> H <sub>2</sub> O <sub>4</sub> | C <sub>2h</sub> | B3LYP | Pauling | -455.92879  | 51.76 (0) | 5.44 | 86.98 | -17.05  |
| <sup>9</sup> C <sub>4</sub> H <sub>2</sub> O <sub>4</sub> <sup>2-</sup>  | C <sub>2h</sub> | B3LYP | Klamt   | -454.71679  | 35.18 (0) | 5.20 | 86.48 | -187.92 |
| <sup>9</sup> HC <sub>4</sub> H <sub>2</sub> O <sub>4</sub> <sup>-</sup>  | C <sub>1</sub>  | B3LYP | Klamt   | -455.38647  | 43.09 (0) | 5.42 | 89.58 | -57.79  |
| <sup>9</sup> H <sub>2</sub> C <sub>4</sub> H <sub>2</sub> O <sub>4</sub> | C <sub>2h</sub> | B3LYP | Klamt   | -455.92879  | 51.76 (0) | 5.44 | 86.98 | -5.67   |
| <sup>9</sup> C <sub>4</sub> H <sub>2</sub> O <sub>4</sub> <sup>2-</sup>  | C <sub>2h</sub> | B3LYP | SMD     | -454.71679  | 35.18 (0) | 5.20 | 86.48 | -196.16 |
| <sup>9</sup> HC <sub>4</sub> H <sub>2</sub> O <sub>4</sub> <sup>-</sup>  | C <sub>1</sub>  | B3LYP | SMD     | -455.38647  | 43.09 (0) | 5.42 | 89.58 | -63.32  |
| <sup>9</sup> H <sub>2</sub> C <sub>4</sub> H <sub>2</sub> O <sub>4</sub> | C <sub>2h</sub> | B3LYP | SMD     | -455.92879  | 51.76 (0) | 5.44 | 86.98 | -10.21  |
| <sup>9</sup> C <sub>4</sub> H <sub>2</sub> O <sub>4</sub> <sup>2-</sup>  | C <sub>2h</sub> | PBE   | UFF     | -454.22689  | 33.87 (0) | 5.34 | 87.93 | -184.00 |
| <sup>9</sup> HC <sub>4</sub> H <sub>2</sub> O <sub>4</sub> <sup>-</sup>  | C <sub>1</sub>  | PBE   | UFF     | -454.89753  | 41.54 (0) | 5.57 | 91.36 | -52.70  |
| <sup>9</sup> H <sub>2</sub> C <sub>4</sub> H <sub>2</sub> O <sub>4</sub> | C <sub>2h</sub> | PBE   | UFF     | -455.43332  | 50.11 (0) | 5.53 | 87.51 | -1.30   |
| <sup>9</sup> C <sub>4</sub> H <sub>2</sub> O <sub>4</sub> <sup>2-</sup>  | C <sub>2h</sub> | PBE   | UAKS    | -454.22689  | 33.87 (0) | 5.34 | 87.93 | -194.01 |
| <sup>9</sup> HC <sub>4</sub> H <sub>2</sub> O <sub>4</sub> <sup>-</sup>  | C <sub>1</sub>  | PBE   | UAKS    | -454.89753  | 41.54 (0) | 5.57 | 91.36 | -62.27  |
| <sup>9</sup> H <sub>2</sub> C <sub>4</sub> H <sub>2</sub> O <sub>4</sub> | C <sub>2h</sub> | PBE   | UAKS    | -455.43332  | 50.11 (0) | 5.53 | 87.51 | -12.45  |
| <sup>9</sup> C <sub>4</sub> H <sub>2</sub> O <sub>4</sub> <sup>2-</sup>  | C <sub>2h</sub> | PBE   | Pauling | -454.22689  | 33.87 (0) | 5.34 | 87.93 | -197.77 |
| <sup>9</sup> HC <sub>4</sub> H <sub>2</sub> O <sub>4</sub> <sup>-</sup>  | C <sub>1</sub>  | PBE   | Pauling | -454.89753  | 41.54 (0) | 5.57 | 91.36 | -63.99  |
| <sup>9</sup> H <sub>2</sub> C <sub>4</sub> H <sub>2</sub> O <sub>4</sub> | C <sub>2h</sub> | PBE   | Pauling | -455.43332  | 50.11 (0) | 5.53 | 87.51 | -14.76  |
| <sup>9</sup> C <sub>4</sub> H <sub>2</sub> O <sub>4</sub> <sup>2-</sup>  | C <sub>2h</sub> | PBE   | Klamt   | -454.22689  | 33.87 (0) | 5.34 | 87.93 | -185.65 |
| <sup>9</sup> HC <sub>4</sub> H <sub>2</sub> O <sub>4</sub> <sup>-</sup>  | C <sub>1</sub>  | PBE   | Klamt   | -454.89753  | 41.54 (0) | 5.57 | 91.36 | -55.00  |
| <sup>9</sup> H <sub>2</sub> C <sub>4</sub> H <sub>2</sub> O <sub>4</sub> | C <sub>2h</sub> | PBE   | Klamt   | -455.43332  | 50.11 (0) | 5.53 | 87.51 | -3.68   |
| <sup>9</sup> C <sub>4</sub> H <sub>2</sub> O <sub>4</sub> <sup>2-</sup>  | C <sub>2h</sub> | PBE   | SMD     | -454.22689  | 33.87 (0) | 5.34 | 87.93 | -193.43 |
| <sup>9</sup> HC <sub>4</sub> H <sub>2</sub> O <sub>4</sub> <sup>-</sup>  | C <sub>1</sub>  | PBE   | SMD     | -454.89753  | 41.54 (0) | 5.57 | 91.36 | -60.12  |
| <sup>9</sup> H <sub>2</sub> C <sub>4</sub> H <sub>2</sub> O <sub>4</sub> | C <sub>2h</sub> | PBE   | SMD     | -455.43332  | 50.11 (0) | 5.53 | 87.51 | -9.27   |
| <sup>9</sup> C <sub>4</sub> H <sub>2</sub> O <sub>4</sub> <sup>2-</sup>  | C <sub>2h</sub> | BVP86 | UFF     | -454.75367  | 33.83 (0) | 5.33 | 87.88 | -184.79 |
| <sup>9</sup> HC <sub>4</sub> H <sub>2</sub> O <sub>4</sub> <sup>-</sup>  | C <sub>1</sub>  | BVP86 | UFF     | -455.42518  | 41.49 (0) | 5.57 | 91.30 | -53.04  |
| <sup>9</sup> H <sub>2</sub> C <sub>4</sub> H <sub>2</sub> O <sub>4</sub> | C <sub>2h</sub> | BVP86 | UFF     | -455.96185  | 50.04 (0) | 5.53 | 87.54 | -1.37   |
| <sup>9</sup> C <sub>4</sub> H <sub>2</sub> O <sub>4</sub> <sup>2-</sup>  | C <sub>2h</sub> | BVP86 | UAKS    | -454.75367  | 33.83 (0) | 5.33 | 87.88 | -194.92 |
| <sup>9</sup> HC <sub>4</sub> H <sub>2</sub> O <sub>4</sub> <sup>-</sup>  | C <sub>1</sub>  | BVP86 | UAKS    | -455.42518  | 41.49 (0) | 5.57 | 91.30 | -62.66  |



|                                                |                 |       |         |            |           |      |       |         |
|------------------------------------------------|-----------------|-------|---------|------------|-----------|------|-------|---------|
| ${}^9\text{H}_2\text{C}_4\text{H}_2\text{O}_4$ | $\text{C}_{2h}$ | BVP86 | UAKS    | -455.96185 | 50.04 (0) | 5.53 | 87.54 | -12.47  |
| ${}^9\text{C}_4\text{H}_2\text{O}_4^{2-}$      | $\text{C}_{2h}$ | BVP86 | Pauling | -454.75367 | 33.83 (0) | 5.33 | 87.88 | -198.98 |
| ${}^9\text{HC}_4\text{H}_2\text{O}_4^-$        | $\text{C}_1$    | BVP86 | Pauling | -455.42518 | 41.49 (0) | 5.57 | 91.30 | -64.66  |
| ${}^9\text{H}_2\text{C}_4\text{H}_2\text{O}_4$ | $\text{C}_{2h}$ | BVP86 | Pauling | -455.96185 | 50.04 (0) | 5.53 | 87.54 | -14.96  |
| ${}^9\text{C}_4\text{H}_2\text{O}_4^{2-}$      | $\text{C}_{2h}$ | BVP86 | Klamt   | -454.75367 | 33.83 (0) | 5.33 | 87.88 | -186.46 |
| ${}^9\text{HC}_4\text{H}_2\text{O}_4^-$        | $\text{C}_1$    | BVP86 | Klamt   | -455.42518 | 41.49 (0) | 5.57 | 91.30 | -55.36  |
| ${}^9\text{H}_2\text{C}_4\text{H}_2\text{O}_4$ | $\text{C}_{2h}$ | BVP86 | Klamt   | -455.96185 | 50.04 (0) | 5.53 | 87.54 | -4.87   |
| ${}^9\text{C}_4\text{H}_2\text{O}_4^{2-}$      | $\text{C}_{2h}$ | BVP86 | SMD     | -454.75367 | 33.83 (0) | 5.33 | 87.88 | -194.49 |
| ${}^9\text{HC}_4\text{H}_2\text{O}_4^-$        | $\text{C}_1$    | BVP86 | SMD     | -455.42518 | 41.49 (0) | 5.57 | 91.30 | -60.65  |
| ${}^9\text{H}_2\text{C}_4\text{H}_2\text{O}_4$ | $\text{C}_{2h}$ | BVP86 | SMD     | -455.96185 | 50.04 (0) | 5.53 | 87.54 | -9.41   |
| ${}^9\text{C}_4\text{H}_2\text{O}_4^{2-}$      | $\text{C}_{2h}$ | M052X | UFF     | -454.67230 | 36.24 (0) | 5.10 | 85.30 | -188.87 |
| ${}^9\text{HC}_4\text{H}_2\text{O}_4^-$        | $\text{C}_1$    | M052X | UFF     | -455.33862 | 44.32 (0) | 5.30 | 88.29 | -58.11  |
| ${}^9\text{H}_2\text{C}_4\text{H}_2\text{O}_4$ | $\text{C}_{2h}$ | M052X | UFF     | -455.87984 | 52.86 (0) | 5.37 | 86.45 | -3.12   |
| ${}^9\text{C}_4\text{H}_2\text{O}_4^{2-}$      | $\text{C}_{2h}$ | M052X | UAKS    | -454.67230 | 36.24 (0) | 5.10 | 85.30 | -199.78 |
| ${}^9\text{HC}_4\text{H}_2\text{O}_4^-$        | $\text{C}_1$    | M052X | UAKS    | -455.33862 | 44.32 (0) | 5.30 | 88.29 | -67.99  |
| ${}^9\text{H}_2\text{C}_4\text{H}_2\text{O}_4$ | $\text{C}_{2h}$ | M052X | UAKS    | -455.87984 | 52.86 (0) | 5.37 | 86.45 | -13.62  |
| ${}^9\text{C}_4\text{H}_2\text{O}_4^{2-}$      | $\text{C}_{2h}$ | M052X | Pauling | -454.67230 | 36.24 (0) | 5.10 | 85.30 | -206.04 |
| ${}^9\text{HC}_4\text{H}_2\text{O}_4^-$        | $\text{C}_1$    | M052X | Pauling | -455.33862 | 44.32 (0) | 5.30 | 88.29 | -72.80  |
| ${}^9\text{H}_2\text{C}_4\text{H}_2\text{O}_4$ | $\text{C}_{2h}$ | M052X | Pauling | -455.87984 | 52.86 (0) | 5.37 | 86.45 | -17.98  |
| ${}^9\text{C}_4\text{H}_2\text{O}_4^{2-}$      | $\text{C}_{2h}$ | M052X | Klamt   | -454.67230 | 36.24 (0) | 5.10 | 85.30 | -190.65 |
| ${}^9\text{HC}_4\text{H}_2\text{O}_4^-$        | $\text{C}_1$    | M052X | Klamt   | -455.33862 | 44.32 (0) | 5.30 | 88.29 | -60.41  |
| ${}^9\text{H}_2\text{C}_4\text{H}_2\text{O}_4$ | $\text{C}_{2h}$ | M052X | Klamt   | -455.87984 | 52.86 (0) | 5.37 | 86.45 | -6.16   |
| ${}^9\text{C}_4\text{H}_2\text{O}_4^{2-}$      | $\text{C}_{2h}$ | M052X | SMD     | -454.67230 | 36.24 (0) | 5.10 | 85.30 | -199.76 |
| ${}^9\text{HC}_4\text{H}_2\text{O}_4^-$        | $\text{C}_1$    | M052X | SMD     | -455.33862 | 44.32 (0) | 5.30 | 88.29 | -66.51  |
| ${}^9\text{H}_2\text{C}_4\text{H}_2\text{O}_4$ | $\text{C}_{2h}$ | M052X | SMD     | -455.87984 | 52.86 (0) | 5.37 | 86.45 | -10.96  |
| $\text{C}_4\text{H}_4\text{O}_4^{2-}$          | $\text{C}_2$    | B3LYP | UFF     | -455.94110 | 49.48 (0) | 5.56 | 91.14 | -185.66 |
| $\text{HC}_4\text{H}_4\text{O}_4^-$            | $\text{C}_1$    | B3LYP | UFF     | -456.63686 | 56.95 (0) | 5.19 | 86.04 | -51.01  |
| $\text{H}_2\text{C}_4\text{H}_4\text{O}_4$     | $\text{C}_1$    | B3LYP | UFF     | -457.15912 | 66.75 (0) | 5.50 | 88.54 | -5.23   |
| $\text{C}_4\text{H}_4\text{O}_4^{2-}$          | $\text{C}_2$    | B3LYP | UAKS    | -455.94110 | 49.48 (0) | 5.56 | 91.14 | -198.61 |
| $\text{HC}_4\text{H}_4\text{O}_4^-$            | $\text{C}_1$    | B3LYP | UAKS    | -456.63686 | 56.95 (0) | 5.19 | 86.04 | -57.18  |
| $\text{H}_2\text{C}_4\text{H}_4\text{O}_4$     | $\text{C}_1$    | B3LYP | UAKS    | -457.15912 | 66.75 (0) | 5.50 | 88.54 | -14.16  |
| $\text{C}_4\text{H}_4\text{O}_4^{2-}$          | $\text{C}_2$    | B3LYP | Pauling | -455.94110 | 49.48 (0) | 5.56 | 91.14 | -201.91 |
| $\text{HC}_4\text{H}_4\text{O}_4^-$            | $\text{C}_1$    | B3LYP | Pauling | -456.63686 | 56.95 (0) | 5.19 | 86.04 | -61.43  |
| $\text{H}_2\text{C}_4\text{H}_4\text{O}_4$     | $\text{C}_1$    | B3LYP | Pauling | -457.15912 | 66.75 (0) | 5.50 | 88.54 | -17.34  |
| $\text{C}_4\text{H}_4\text{O}_4^{2-}$          | $\text{C}_2$    | B3LYP | Klamt   | -455.94110 | 49.48 (0) | 5.56 | 91.14 | -188.31 |
| $\text{HC}_4\text{H}_4\text{O}_4^-$            | $\text{C}_1$    | B3LYP | Klamt   | -456.63686 | 56.95 (0) | 5.19 | 86.04 | -53.19  |
| $\text{H}_2\text{C}_4\text{H}_4\text{O}_4$     | $\text{C}_1$    | B3LYP | Klamt   | -457.15912 | 66.75 (0) | 5.50 | 88.54 | -7.98   |
| $\text{C}_4\text{H}_4\text{O}_4^{2-}$          | $\text{C}_2$    | B3LYP | SMD     | -455.94110 | 49.48 (0) | 5.56 | 91.14 | -197.92 |
| $\text{HC}_4\text{H}_4\text{O}_4^-$            | $\text{C}_1$    | B3LYP | SMD     | -456.63686 | 56.95 (0) | 5.19 | 86.04 | -57.47  |
| $\text{H}_2\text{C}_4\text{H}_4\text{O}_4$     | $\text{C}_1$    | B3LYP | SMD     | -457.15912 | 66.75 (0) | 5.50 | 88.54 | -13.44  |
| $\text{C}_4\text{H}_4\text{O}_4^{2-}$          | $\text{C}_2$    | PBE   | UFF     | -455.44070 | 47.84 (0) | 5.65 | 91.25 | -183.35 |
| $\text{HC}_4\text{H}_4\text{O}_4^-$            | $\text{C}_1$    | PBE   | UFF     | -456.13699 | 54.59 (0) | 5.31 | 86.61 | -49.39  |
| $\text{H}_2\text{C}_4\text{H}_4\text{O}_4$     | $\text{C}_1$    | PBE   | UFF     | -456.65369 | 64.67 (0) | 5.58 | 89.11 | -4.46   |
| $\text{C}_4\text{H}_4\text{O}_4^{2-}$          | $\text{C}_2$    | PBE   | UAKS    | -455.44070 | 47.84 (0) | 5.65 | 91.21 | -195.77 |
| $\text{HC}_4\text{H}_4\text{O}_4^-$            | $\text{C}_1$    | PBE   | UAKS    | -456.13699 | 54.59 (0) | 5.31 | 86.61 | -55.80  |
| $\text{H}_2\text{C}_4\text{H}_4\text{O}_4$     | $\text{C}_1$    | PBE   | UAKS    | -456.65369 | 64.67 (0) | 5.58 | 89.11 | -14.28  |
| $\text{C}_4\text{H}_4\text{O}_4^{2-}$          | $\text{C}_2$    | PBE   | Pauling | -455.44070 | 47.84 (0) | 5.65 | 91.25 | -197.95 |

|                                                             |                |       |         |            |          |      |       |         |
|-------------------------------------------------------------|----------------|-------|---------|------------|----------|------|-------|---------|
| HC <sub>4</sub> H <sub>4</sub> O <sub>4</sub> <sup>-</sup>  | C <sub>1</sub> | PBE   | Pauling | -456.13699 | 54.59(0) | 5.31 | 86.61 | -58.33  |
| H <sub>2</sub> C <sub>4</sub> H <sub>4</sub> O <sub>4</sub> | C <sub>1</sub> | PBE   | Pauling | -456.65369 | 64.67(0) | 5.58 | 89.11 | -15.50  |
| C <sub>4</sub> H <sub>4</sub> O <sub>4</sub> <sup>2-</sup>  | C <sub>2</sub> | PBE   | Klamt   | -455.44070 | 47.84(0) | 5.65 | 91.25 | -186.04 |
| HC <sub>4</sub> H <sub>4</sub> O <sub>4</sub> <sup>-</sup>  | C <sub>1</sub> | PBE   | Klamt   | -456.13699 | 54.59(0) | 5.31 | 86.61 | -51.51  |
| H <sub>2</sub> C <sub>4</sub> H <sub>4</sub> O <sub>4</sub> | C <sub>1</sub> | PBE   | Klamt   | -456.65369 | 64.67(0) | 5.58 | 89.11 | -7.80   |
| C <sub>4</sub> H <sub>4</sub> O <sub>4</sub> <sup>2-</sup>  | C <sub>2</sub> | PBE   | SMD     | -455.44070 | 47.84(0) | 5.65 | 91.25 | -194.89 |
| HC <sub>4</sub> H <sub>4</sub> O <sub>4</sub> <sup>-</sup>  | C <sub>1</sub> | PBE   | SMD     | -456.13699 | 54.59(0) | 5.31 | 86.61 | -55.36  |
| H <sub>2</sub> C <sub>4</sub> H <sub>4</sub> O <sub>4</sub> | C <sub>1</sub> | PBE   | SMD     | -456.65369 | 64.67(0) | 5.58 | 89.11 | -12.47  |
| C <sub>4</sub> H <sub>4</sub> O <sub>4</sub> <sup>2-</sup>  | C <sub>2</sub> | BVP86 | UFF     | -455.97579 | 47.79(0) | 5.66 | 91.29 | -184.16 |
| HC <sub>4</sub> H <sub>4</sub> O <sub>4</sub> <sup>-</sup>  | C <sub>1</sub> | BVP86 | UFF     | -456.67304 | 54.53(0) | 5.32 | 86.64 | -49.72  |
| H <sub>2</sub> C <sub>4</sub> H <sub>4</sub> O <sub>4</sub> | C <sub>1</sub> | BVP86 | UFF     | -457.19050 | 64.62(0) | 5.58 | 89.10 | -4.60   |
| C <sub>4</sub> H <sub>4</sub> O <sub>4</sub> <sup>2-</sup>  | C <sub>2</sub> | BVP86 | UAKS    | -455.97579 | 47.79(0) | 5.66 | 91.29 | -196.73 |
| HC <sub>4</sub> H <sub>4</sub> O <sub>4</sub> <sup>-</sup>  | C <sub>1</sub> | BVP86 | UAKS    | -456.67304 | 54.53(0) | 5.32 | 86.64 | -56.08  |
| H <sub>2</sub> C <sub>4</sub> H <sub>4</sub> O <sub>4</sub> | C <sub>1</sub> | BVP86 | UAKS    | -457.19050 | 64.62(0) | 5.58 | 89.10 | -14.33  |
| C <sub>4</sub> H <sub>4</sub> O <sub>4</sub> <sup>2-</sup>  | C <sub>2</sub> | BVP86 | Pauling | -455.97579 | 47.79(0) | 5.66 | 91.29 | -199.21 |
| HC <sub>4</sub> H <sub>4</sub> O <sub>4</sub> <sup>-</sup>  | C <sub>1</sub> | BVP86 | Pauling | -456.67304 | 54.53(0) | 5.32 | 86.64 | -59.01  |
| H <sub>2</sub> C <sub>4</sub> H <sub>4</sub> O <sub>4</sub> | C <sub>1</sub> | BVP86 | Pauling | -457.19050 | 64.62(0) | 5.58 | 89.10 | -13.05  |
| C <sub>4</sub> H <sub>4</sub> O <sub>4</sub> <sup>2-</sup>  | C <sub>2</sub> | BVP86 | Klamt   | -455.97579 | 47.79(0) | 5.66 | 91.29 | -186.90 |
| HC <sub>4</sub> H <sub>4</sub> O <sub>4</sub> <sup>-</sup>  | C <sub>1</sub> | BVP86 | Klamt   | -456.67304 | 54.53(0) | 5.32 | 86.64 | -51.87  |
| H <sub>2</sub> C <sub>4</sub> H <sub>4</sub> O <sub>4</sub> | C <sub>1</sub> | BVP86 | Klamt   | -457.19050 | 64.62(0) | 5.58 | 89.10 | -7.92   |
| C <sub>4</sub> H <sub>4</sub> O <sub>4</sub> <sup>2-</sup>  | C <sub>2</sub> | BVP86 | SMD     | -455.97579 | 47.79(0) | 5.66 | 91.29 | -196.01 |
| HC <sub>4</sub> H <sub>4</sub> O <sub>4</sub> <sup>-</sup>  | C <sub>1</sub> | BVP86 | SMD     | -456.67304 | 54.53(0) | 5.32 | 86.64 | -55.88  |
| H <sub>2</sub> C <sub>4</sub> H <sub>4</sub> O <sub>4</sub> | C <sub>1</sub> | BVP86 | SMD     | -457.19050 | 64.62(0) | 5.58 | 89.10 | -12.63  |
| C <sub>4</sub> H <sub>4</sub> O <sub>4</sub> <sup>2-</sup>  | C <sub>2</sub> | M052X | UFF     | -455.89443 | 50.74(0) | 5.50 | 90.83 | -188.96 |
| HC <sub>4</sub> H <sub>4</sub> O <sub>4</sub> <sup>-</sup>  | C <sub>1</sub> | M052X | UFF     | -456.59208 | 58.13(0) | 5.08 | 85.26 | -52.48  |
| H <sub>2</sub> C <sub>4</sub> H <sub>4</sub> O <sub>4</sub> | C <sub>1</sub> | M052X | UFF     | -457.11074 | 68.05(0) | 5.45 | 88.25 | -5.53   |
| C <sub>4</sub> H <sub>4</sub> O <sub>4</sub> <sup>2-</sup>  | C <sub>2</sub> | M052X | UAKS    | -455.89443 | 50.74(0) | 5.50 | 90.83 | -202.46 |
| HC <sub>4</sub> H <sub>4</sub> O <sub>4</sub> <sup>-</sup>  | C <sub>1</sub> | M052X | UAKS    | -456.59208 | 58.13(0) | 5.08 | 85.26 | -58.69  |
| H <sub>2</sub> C <sub>4</sub> H <sub>4</sub> O <sub>4</sub> | C <sub>1</sub> | M052X | UAKS    | -457.11074 | 68.05(0) | 5.45 | 88.25 | -15.12  |
| C <sub>4</sub> H <sub>4</sub> O <sub>4</sub> <sup>2-</sup>  | C <sub>2</sub> | M052X | Pauling | -455.89443 | 50.74(0) | 5.50 | 90.83 | -207.14 |
| HC <sub>4</sub> H <sub>4</sub> O <sub>4</sub> <sup>-</sup>  | C <sub>1</sub> | M052X | Pauling | -456.59208 | 58.13(0) | 5.08 | 85.26 | -63.54  |
| H <sub>2</sub> C <sub>4</sub> H <sub>4</sub> O <sub>4</sub> | C <sub>1</sub> | M052X | Pauling | -457.11074 | 68.05(0) | 5.45 | 88.25 | -17.52  |
| C <sub>4</sub> H <sub>4</sub> O <sub>4</sub> <sup>2-</sup>  | C <sub>2</sub> | M052X | Klamt   | -455.89443 | 50.74(0) | 5.50 | 90.83 | -191.77 |
| HC <sub>4</sub> H <sub>4</sub> O <sub>4</sub> <sup>-</sup>  | C <sub>1</sub> | M052X | Klamt   | -456.59208 | 58.13(0) | 5.08 | 85.26 | -54.71  |
| H <sub>2</sub> C <sub>4</sub> H <sub>4</sub> O <sub>4</sub> | C <sub>1</sub> | M052X | Klamt   | -457.11074 | 68.05(0) | 5.45 | 88.25 | -8.96   |
| C <sub>4</sub> H <sub>4</sub> O <sub>4</sub> <sup>2-</sup>  | C <sub>2</sub> | M052X | SMD     | -455.89443 | 50.74(0) | 5.50 | 90.83 | -202.39 |
| HC <sub>4</sub> H <sub>4</sub> O <sub>4</sub> <sup>-</sup>  | C <sub>1</sub> | M052X | SMD     | -456.59208 | 58.13(0) | 5.08 | 85.26 | -59.22  |
| H <sub>2</sub> C <sub>4</sub> H <sub>4</sub> O <sub>4</sub> | C <sub>1</sub> | M052X | SMD     | -457.11074 | 68.05(0) | 5.45 | 88.25 | -14.25  |

<sup>a</sup>Point group. <sup>b</sup>Zero-point energies and number of imaginary frequencies.

<sup>c</sup>Thermal corrections to 298K. <sup>d</sup>Entropies. <sup>e</sup>Free energy of solvation is the sum of energy difference between gaseous and aqueous state and total non-electrostatic contribution. A correction factor of 1.89 kcal/mol should be added to the calculated values to account for the change of state from 1 mol/atm (24.47 L at 298 K in gas phase) to 1 mol/L (aqueous phase).

<sup>f</sup>Maleic acid (D). <sup>g</sup>Fumaric acid (N).

Table S2. Point Group, DFT Method, Cavity Model, Total Energies (hartrees), Zero-point Energies (kcal/mol) with number of Imaginary Frequencies in Parentheses, Thermal Corrections (kcal/mol), Entropies (cal/mol·K), and Free energy of Solvation (kcal/mol)

|                                             | PG <sup>a</sup> | DFT   | Cavity Model | SCF Energy | ZPE <sup>b</sup><br>(NIF) | TC <sup>c</sup> | S <sup>d</sup> | Solvation Free Energy <sup>e</sup> |
|---------------------------------------------|-----------------|-------|--------------|------------|---------------------------|-----------------|----------------|------------------------------------|
| <sup>f</sup> PO <sub>4</sub> <sup>3-</sup>  | T <sub>d</sub>  | B3LYP | UFF          | -642.04528 | 8.58 (0)                  | 3.30            | 64.56          | -526.28                            |
| <sup>g</sup> HPO <sub>4</sub> <sup>2-</sup> | C <sub>1</sub>  | B3LYP | UFF          | -643.02988 | 15.80 (0)                 | 3.75            | 72.13          | -234.69                            |
| HPO <sub>4</sub> <sup>2-</sup>              | C <sub>1</sub>  | B3LYP | UFF          | -643.07253 | 15.48 (0)                 | 3.83            | 72.72          | -226.04                            |
| H <sub>2</sub> PO <sub>4</sub> <sup>-</sup> | C <sub>1</sub>  | B3LYP | UFF          | -643.80998 | 23.16 (0)                 | 4.13            | 74.57          | -62.83                             |
| H <sub>3</sub> PO <sub>4</sub>              | C <sub>1</sub>  | B3LYP | UFF          | -644.34250 | 30.29 (0)                 | 4.53            | 77.15          | -8.37                              |
| <sup>f</sup> PO <sub>4</sub> <sup>3-</sup>  | T <sub>d</sub>  | B3LYP | UAKS         | -642.04528 | 8.58 (0)                  | 3.30            | 64.56          | -528.89                            |
| <sup>g</sup> HPO <sub>4</sub> <sup>2-</sup> | C <sub>1</sub>  | B3LYP | UAKS         | -643.02988 | 15.80 (0)                 | 3.75            | 72.13          | -232.24                            |
| HPO <sub>4</sub> <sup>2-</sup>              | C <sub>1</sub>  | B3LYP | UAKS         | -643.07253 | 15.48 (0)                 | 3.83            | 72.72          | -225.06                            |
| H <sub>2</sub> PO <sub>4</sub> <sup>-</sup> | C <sub>1</sub>  | B3LYP | UAKS         | -643.80998 | 23.16 (0)                 | 4.13            | 74.57          | -64.07                             |
| H <sub>3</sub> PO <sub>4</sub>              | C <sub>1</sub>  | B3LYP | UAKS         | -644.34250 | 30.29 (0)                 | 4.53            | 77.15          | -12.65                             |
| <sup>f</sup> PO <sub>4</sub> <sup>3-</sup>  | T <sub>d</sub>  | B3LYP | Pauling      | -642.04528 | 8.58 (0)                  | 3.30            | 64.56          | -567.94                            |
| <sup>g</sup> HPO <sub>4</sub> <sup>2-</sup> | C <sub>1</sub>  | B3LYP | Pauling      | -643.02988 | 15.80 (0)                 | 3.75            | 72.13          | -258.16                            |
| HPO <sub>4</sub> <sup>2-</sup>              | C <sub>1</sub>  | B3LYP | Pauling      | -643.07253 | 15.48 (0)                 | 3.83            | 72.72          | -244.82                            |
| H <sub>2</sub> PO <sub>4</sub> <sup>-</sup> | C <sub>1</sub>  | B3LYP | Pauling      | -643.80998 | 23.16 (0)                 | 4.13            | 74.57          | -75.30                             |
| H <sub>3</sub> PO <sub>4</sub>              | C <sub>1</sub>  | B3LYP | Pauling      | -644.34250 | 30.29 (0)                 | 4.53            | 77.15          | -21.27                             |
| <sup>f</sup> PO <sub>4</sub> <sup>3-</sup>  | T <sub>d</sub>  | B3LYP | Klamt        | -642.04528 | 8.58 (0)                  | 3.30            | 64.56          | -529.03                            |
| <sup>g</sup> HPO <sub>4</sub> <sup>2-</sup> | C <sub>1</sub>  | B3LYP | Klamt        | -643.02988 | 15.80 (0)                 | 3.75            | 72.14          | -236.97                            |
| HPO <sub>4</sub> <sup>2-</sup>              | C <sub>1</sub>  | B3LYP | Klamt        | -643.07252 | 15.48 (0)                 | 3.83            | 72.73          | -228.09                            |
| H <sub>2</sub> PO <sub>4</sub> <sup>-</sup> | C <sub>1</sub>  | B3LYP | Klamt        | -643.80998 | 23.16 (0)                 | 4.12            | 74.55          | -65.33                             |
| H <sub>3</sub> PO <sub>4</sub>              | C <sub>1</sub>  | B3LYP | Klamt        | -644.34250 | 30.28 (0)                 | 4.53            | 77.18          | -12.01                             |
| <sup>f</sup> PO <sub>4</sub> <sup>3-</sup>  | T <sub>d</sub>  | B3LYP | SMD          | -642.04528 | 8.58 (0)                  | 3.30            | 64.56          | -549.64                            |
| <sup>g</sup> HPO <sub>4</sub> <sup>2-</sup> | C <sub>1</sub>  | B3LYP | SMD          | -643.02988 | 15.80 (0)                 | 3.75            | 72.14          | -246.90                            |
| HPO <sub>4</sub> <sup>2-</sup>              | C <sub>1</sub>  | B3LYP | SMD          | -643.07252 | 15.48 (0)                 | 3.83            | 72.73          | -235.61                            |
| H <sub>2</sub> PO <sub>4</sub> <sup>-</sup> | C <sub>1</sub>  | B3LYP | SMD          | -643.80998 | 23.16 (0)                 | 4.12            | 74.55          | -68.51                             |
| H <sub>3</sub> PO <sub>4</sub>              | C <sub>1</sub>  | B3LYP | SMD          | -644.34250 | 30.28 (0)                 | 4.53            | 77.18          | -15.09                             |
| <sup>f</sup> PO <sub>4</sub> <sup>3-</sup>  | T <sub>d</sub>  | PBE   | UFF          | -641.56233 | 8.18 (0)                  | 3.38            | 65.07          | -525.44                            |
| <sup>g</sup> HPO <sub>4</sub> <sup>2-</sup> | C <sub>1</sub>  | PBE   | UFF          | -642.54807 | 15.18 (0)                 | 3.81            | 72.52          | -233.07                            |
| HPO <sub>4</sub> <sup>2-</sup>              | C <sub>1</sub>  | PBE   | UFF          | -642.59608 | 14.81 (0)                 | 3.92            | 73.24          | -222.93                            |
| H <sub>2</sub> PO <sub>4</sub> <sup>-</sup> | C <sub>1</sub>  | PBE   | UFF          | -643.32928 | 22.29 (0)                 | 4.23            | 75.25          | -61.39                             |
| H <sub>3</sub> PO <sub>4</sub>              | C <sub>1</sub>  | PBE   | UFF          | -643.85834 | 29.34 (0)                 | 4.62            | 77.76          | -7.71                              |
| <sup>f</sup> PO <sub>4</sub> <sup>3-</sup>  | T <sub>d</sub>  | PBE   | UAKS         | -641.56233 | 8.18 (0)                  | 3.38            | 65.07          | -528.01                            |
| <sup>g</sup> HPO <sub>4</sub> <sup>2-</sup> | C <sub>1</sub>  | PBE   | UAKS         | -642.54807 | 15.18 (0)                 | 3.81            | 72.52          | -230.60                            |
| HPO <sub>4</sub> <sup>2-</sup>              | C <sub>1</sub>  | PBE   | UAKS         | -642.59608 | 14.81 (0)                 | 3.92            | 73.24          | -222.15                            |
| H <sub>2</sub> PO <sub>4</sub> <sup>-</sup> | C <sub>1</sub>  | PBE   | UAKS         | -643.32928 | 22.29 (0)                 | 4.23            | 75.25          | -62.72                             |
| H <sub>3</sub> PO <sub>4</sub>              | C <sub>1</sub>  | PBE   | UAKS         | -643.85834 | 29.34 (0)                 | 4.62            | 77.76          | -12.29                             |
| <sup>f</sup> PO <sub>4</sub> <sup>3-</sup>  | T <sub>d</sub>  | PBE   | Pauling      | -641.56233 | 8.18 (0)                  | 3.38            | 65.07          | -565.84                            |
| <sup>g</sup> HPO <sub>4</sub> <sup>2-</sup> | C <sub>1</sub>  | PBE   | Pauling      | -642.54807 | 15.18 (0)                 | 3.81            | 72.52          | -255.25                            |
| HPO <sub>4</sub> <sup>2-</sup>              | C <sub>1</sub>  | PBE   | Pauling      | -642.59608 | 14.81 (0)                 | 3.92            | 73.24          | -240.10                            |
| H <sub>2</sub> PO <sub>4</sub> <sup>-</sup> | C <sub>1</sub>  | PBE   | Pauling      | -643.32928 | 22.29 (0)                 | 4.23            | 75.25          | -72.43                             |

|                                             |                |       |         |            |           |      |       |         |
|---------------------------------------------|----------------|-------|---------|------------|-----------|------|-------|---------|
| H <sub>3</sub> PO <sub>4</sub>              | C <sub>1</sub> | PBE   | Pauling | -643.85834 | 29.34 (0) | 4.62 | 77.76 | -19.62  |
| <sup>f</sup> PO <sub>4</sub> <sup>3-</sup>  | T <sub>d</sub> | PBE   | Klamt   | -641.56234 | 8.18 (0)  | 3.38 | 65.07 | -528.09 |
| <sup>g</sup> HPO <sub>4</sub> <sup>2-</sup> | C <sub>1</sub> | PBE   | Klamt   | -642.54807 | 15.18 (0) | 3.81 | 72.52 | -235.19 |
| HPO <sub>4</sub> <sup>2-</sup>              | C <sub>1</sub> | PBE   | Klamt   | -642.59608 | 14.81 (0) | 3.92 | 73.24 | -224.78 |
| H <sub>2</sub> PO <sub>4</sub> <sup>-</sup> | C <sub>1</sub> | PBE   | Klamt   | -643.32928 | 22.29 (0) | 4.23 | 75.21 | -63.51  |
| H <sub>3</sub> PO <sub>4</sub>              | C <sub>1</sub> | PBE   | Klamt   | -643.85834 | 29.34 (0) | 4.62 | 77.76 | -11.24  |
| <sup>f</sup> PO <sub>4</sub> <sup>3-</sup>  | T <sub>d</sub> | PBE   | SMD     | -641.56234 | 8.18 (0)  | 3.38 | 65.07 | -548.08 |
| <sup>g</sup> HPO <sub>4</sub> <sup>2-</sup> | C <sub>1</sub> | PBE   | SMD     | -642.54807 | 15.18 (0) | 3.81 | 72.52 | -244.57 |
| HPO <sub>4</sub> <sup>2-</sup>              | C <sub>1</sub> | PBE   | SMD     | -642.59608 | 14.81 (0) | 3.92 | 73.24 | -231.58 |
| H <sub>2</sub> PO <sub>4</sub> <sup>-</sup> | C <sub>1</sub> | PBE   | SMD     | -643.32928 | 22.29 (0) | 4.23 | 75.21 | -66.16  |
| H <sub>3</sub> PO <sub>4</sub>              | C <sub>1</sub> | PBE   | SMD     | -643.85834 | 29.34 (0) | 4.62 | 77.76 | -13.73  |
| <sup>f</sup> PO <sub>4</sub> <sup>3-</sup>  | T <sub>d</sub> | BVP86 | UFF     | -642.09631 | 8.17 (0)  | 3.38 | 65.07 | -525.21 |
| <sup>g</sup> HPO <sub>4</sub> <sup>2-</sup> | C <sub>1</sub> | BVP86 | UFF     | -643.08032 | 15.14 (0) | 3.82 | 72.57 | -233.13 |
| HPO <sub>4</sub> <sup>2-</sup>              | C <sub>1</sub> | BVP86 | UFF     | -643.12402 | 14.79 (0) | 3.92 | 73.24 | -223.90 |
| H <sub>2</sub> PO <sub>4</sub> <sup>-</sup> | C <sub>1</sub> | BVP86 | UFF     | -643.85816 | 22.27 (0) | 4.23 | 75.20 | -61.81  |
| H <sub>3</sub> PO <sub>4</sub>              | C <sub>1</sub> | BVP86 | UFF     | -644.38812 | 29.31 (0) | 4.62 | 77.73 | -7.82   |
| <sup>f</sup> PO <sub>4</sub> <sup>3-</sup>  | T <sub>d</sub> | BVP86 | UAKS    | -642.09631 | 8.17 (0)  | 3.38 | 65.07 | -527.80 |
| <sup>g</sup> HPO <sub>4</sub> <sup>2-</sup> | C <sub>1</sub> | BVP86 | UAKS    | -643.08032 | 15.14 (0) | 3.82 | 72.57 | -230.66 |
| HPO <sub>4</sub> <sup>2-</sup>              | C <sub>1</sub> | BVP86 | UAKS    | -643.12402 | 14.79 (0) | 3.92 | 73.24 | -223.02 |
| H <sub>2</sub> PO <sub>4</sub> <sup>-</sup> | C <sub>1</sub> | BVP86 | UAKS    | -643.85816 | 22.27 (0) | 4.23 | 75.20 | -63.03  |
| H <sub>3</sub> PO <sub>4</sub>              | C <sub>1</sub> | BVP86 | UAKS    | -644.38812 | 29.31 (0) | 4.62 | 77.73 | -12.35  |
| <sup>f</sup> PO <sub>4</sub> <sup>3-</sup>  | T <sub>d</sub> | BVP86 | Pauling | -642.09631 | 8.17 (0)  | 3.38 | 65.07 | -565.59 |
| <sup>g</sup> HPO <sub>4</sub> <sup>2-</sup> | C <sub>1</sub> | BVP86 | Pauling | -643.08032 | 15.14 (0) | 3.82 | 72.57 | -255.40 |
| HPO <sub>4</sub> <sup>2-</sup>              | C <sub>1</sub> | BVP86 | Pauling | -643.12402 | 14.79 (0) | 3.92 | 73.24 | -241.43 |
| H <sub>2</sub> PO <sub>4</sub> <sup>-</sup> | C <sub>1</sub> | BVP86 | Pauling | -643.85816 | 22.27 (0) | 4.23 | 75.20 | -73.10  |
| H <sub>3</sub> PO <sub>4</sub>              | C <sub>1</sub> | BVP86 | Pauling | -644.38812 | 29.31 (0) | 4.62 | 77.73 | -19.85  |
| <sup>f</sup> PO <sub>4</sub> <sup>3-</sup>  | T <sub>d</sub> | BVP86 | Klamt   | -642.09631 | 8.17 (0)  | 3.38 | 65.07 | -527.87 |
| <sup>g</sup> HPO <sub>4</sub> <sup>2-</sup> | C <sub>1</sub> | BVP86 | Klamt   | -643.08032 | 15.14 (0) | 3.82 | 72.56 | -235.27 |
| HPO <sub>4</sub> <sup>2-</sup>              | C <sub>1</sub> | BVP86 | Klamt   | -643.12402 | 14.79 (0) | 3.92 | 73.24 | -225.80 |
| H <sub>2</sub> PO <sub>4</sub> <sup>-</sup> | C <sub>1</sub> | BVP86 | Klamt   | -643.85816 | 22.27 (0) | 4.23 | 75.24 | -63.76  |
| H <sub>3</sub> PO <sub>4</sub>              | C <sub>1</sub> | BVP86 | Klamt   | -644.38812 | 29.31 (0) | 4.62 | 77.72 | -11.37  |
| <sup>f</sup> PO <sub>4</sub> <sup>3-</sup>  | T <sub>d</sub> | BVP86 | SMD     | -642.09631 | 8.17 (0)  | 3.38 | 65.07 | -547.91 |
| <sup>g</sup> HPO <sub>4</sub> <sup>2-</sup> | C <sub>1</sub> | BVP86 | SMD     | -643.08032 | 15.14 (0) | 3.82 | 72.56 | -244.71 |
| HPO <sub>4</sub> <sup>2-</sup>              | C <sub>1</sub> | BVP86 | SMD     | -643.12402 | 14.79 (0) | 3.92 | 73.24 | -232.78 |
| H <sub>2</sub> PO <sub>4</sub> <sup>-</sup> | C <sub>1</sub> | BVP86 | SMD     | -643.85816 | 22.27 (0) | 4.23 | 75.24 | -66.76  |
| H <sub>3</sub> PO <sub>4</sub>              | C <sub>1</sub> | BVP86 | SMD     | -644.38812 | 29.31 (0) | 4.62 | 77.72 | -13.90  |
| <sup>f</sup> PO <sub>4</sub> <sup>3-</sup>  | T <sub>d</sub> | M052X | UFF     | -642.02662 | 8.91 (0)  | 3.24 | 64.22 | -527.03 |
| <sup>g</sup> HPO <sub>4</sub> <sup>2-</sup> | C <sub>1</sub> | M052X | UFF     | -643.00157 | 16.20 (0) | 3.71 | 71.94 | -236.24 |
| HPO <sub>4</sub> <sup>2-</sup>              | C <sub>1</sub> | M052X | UFF     | -643.03359 | 15.93 (0) | 3.78 | 72.53 | -229.86 |
| H <sub>2</sub> PO <sub>4</sub> <sup>-</sup> | C <sub>1</sub> | M052X | UFF     | -643.77085 | 23.67 (0) | 4.05 | 74.07 | -64.64  |
| H <sub>3</sub> PO <sub>4</sub>              | C <sub>1</sub> | M052X | UFF     | -644.30171 | 30.67 (0) | 4.51 | 77.15 | -9.39   |
| <sup>f</sup> PO <sub>4</sub> <sup>3-</sup>  | T <sub>d</sub> | M052X | UAKS    | -642.02662 | 8.91 (0)  | 3.24 | 64.22 | -529.68 |
| <sup>g</sup> HPO <sub>4</sub> <sup>2-</sup> | C <sub>1</sub> | M052X | UAKS    | -643.00157 | 16.20 (0) | 3.71 | 71.94 | -233.77 |
| HPO <sub>4</sub> <sup>2-</sup>              | C <sub>1</sub> | M052X | UAKS    | -643.03359 | 15.93 (0) | 3.78 | 72.53 | -228.56 |
| H <sub>2</sub> PO <sub>4</sub> <sup>-</sup> | C <sub>1</sub> | M052X | UAKS    | -643.77085 | 23.67 (0) | 4.05 | 74.07 | -65.59  |
| H <sub>3</sub> PO <sub>4</sub>              | C <sub>1</sub> | M052X | UAKS    | -644.30171 | 30.67 (0) | 4.51 | 77.15 | -13.55  |

|                            |       |       |         |             |          |      |       |         |
|----------------------------|-------|-------|---------|-------------|----------|------|-------|---------|
| ${}^f\text{PO}_4^{3-}$     | $T_d$ | M052X | Pauling | -642.02662  | 8.91(0)  | 3.24 | 64.22 | -569.56 |
| ${}^g\text{HPO}_4^{2-}$    | $C_1$ | M052X | Pauling | -643.00157  | 16.20(0) | 3.71 | 71.94 | -260.66 |
| $\text{HPO}_4^{2-}$        | $C_1$ | M052X | Pauling | -643.03359  | 15.93(0) | 3.78 | 72.53 | -250.55 |
| $\text{H}_2\text{PO}_4^-$  | $C_1$ | M052X | Pauling | -643.77085  | 23.67(0) | 4.05 | 74.07 | -78.07  |
| $\text{H}_3\text{PO}_4$    | $C_1$ | M052X | Pauling | -644.30171  | 30.67(0) | 4.51 | 77.15 | -22.37  |
| ${}^f\text{PO}_4^{3-}$     | $T_d$ | M052X | Klamt   | -642.02662  | 8.91(0)  | 3.24 | 64.23 | -530.12 |
| ${}^g\text{HPO}_4^{2-}$    | $C_1$ | M052X | Klamt   | -643.00157  | 16.20(0) | 3.71 | 71.94 | -238.67 |
| $\text{HPO}_4^{2-}$        | $C_1$ | M052X | Klamt   | -643.03359  | 15.93(0) | 3.78 | 72.54 | -232.05 |
| $\text{H}_2\text{PO}_4^-$  | $C_1$ | M052X | Klamt   | -643.77085  | 23.68(0) | 4.05 | 74.06 | -67.00  |
| $\text{H}_3\text{PO}_4$    | $C_1$ | M052X | Klamt   | -644.30171  | 30.67(0) | 4.51 | 77.14 | -13.16  |
| ${}^f\text{PO}_4^{3-}$     | $T_d$ | M052X | SMD     | -642.02662  | 8.91(0)  | 3.24 | 64.23 | -550.95 |
| ${}^g\text{HPO}_4^{2-}$    | $C_1$ | M052X | SMD     | -643.00157  | 16.20(0) | 3.71 | 71.94 | -249.00 |
| $\text{HPO}_4^{2-}$        | $C_1$ | M052X | SMD     | -643.03359  | 15.93(0) | 3.78 | 72.54 | -240.44 |
| $\text{H}_2\text{PO}_4^-$  | $C_1$ | M052X | SMD     | -643.77085  | 23.68(0) | 4.05 | 74.06 | -70.78  |
| $\text{H}_3\text{PO}_4$    | $C_1$ | M052X | SMD     | -644.30171  | 30.67(0) | 4.51 | 77.14 | -16.36  |
| ${}^f\text{AsO}_4^{3-}$    | $T_d$ | B3LYP | UFF     | -2536.54836 | 6.72(0)  | 3.74 | 68.69 | -505.10 |
| ${}^g\text{HASO}_4^{2-}$   | $C_1$ | B3LYP | UFF     | -2537.55828 | 13.64(0) | 4.25 | 76.76 | -222.90 |
| $\text{HASO}_4^{2-}$       | $C_1$ | B3LYP | UFF     | -2537.51531 | 13.93(0) | 4.15 | 76.06 | -214.36 |
| $\text{H}_2\text{AsO}_4^-$ | $C_1$ | B3LYP | UFF     | -2538.28696 | 21.03(0) | 4.62 | 79.11 | -56.83  |
| $\text{H}_3\text{AsO}_4$   | $C_1$ | B3LYP | UFF     | -2538.81779 | 27.72(0) | 5.36 | 86.19 | -5.43   |
| ${}^f\text{AsO}_4^{3-}$    | $T_d$ | B3LYP | UAKS    | -2536.54836 | 6.72(0)  | 3.74 | 68.69 | -516.40 |
| ${}^g\text{HASO}_4^{2-}$   | $C_1$ | B3LYP | UAKS    | -2537.55828 | 13.64(0) | 4.25 | 76.76 | -229.90 |
| $\text{HASO}_4^{2-}$       | $C_1$ | B3LYP | UAKS    | -2537.51531 | 13.93(0) | 4.15 | 76.06 | -222.14 |
| $\text{H}_2\text{AsO}_4^-$ | $C_1$ | B3LYP | UAKS    | -2538.28696 | 21.03(0) | 4.62 | 79.11 | -65.11  |
| $\text{H}_3\text{AsO}_4$   | $C_1$ | B3LYP | UAKS    | -2538.81779 | 27.72(0) | 5.36 | 86.19 | -15.66  |
| ${}^f\text{AsO}_4^{3-}$    | $T_d$ | B3LYP | Pauling | -2536.54836 | 6.72(0)  | 3.74 | 68.69 | -543.20 |
| ${}^g\text{HASO}_4^{2-}$   | $C_1$ | B3LYP | Pauling | -2537.55828 | 13.64(0) | 4.25 | 76.76 | -244.90 |
| $\text{HASO}_4^{2-}$       | $C_1$ | B3LYP | Pauling | -2537.51531 | 13.93(0) | 4.15 | 76.06 | -232.08 |
| $\text{H}_2\text{AsO}_4^-$ | $C_1$ | B3LYP | Pauling | -2538.28696 | 21.03(0) | 4.62 | 79.11 | -68.86  |
| $\text{H}_3\text{AsO}_4$   | $C_1$ | B3LYP | Pauling | -2538.81779 | 27.72(0) | 5.36 | 86.19 | -17.70  |
| ${}^f\text{AsO}_4^{3-}$    | $T_d$ | B3LYP | Klamt   | -2536.54836 | 6.72(0)  | 3.74 | 68.70 | -506.90 |
| ${}^g\text{HASO}_4^{2-}$   | $C_1$ | B3LYP | Klamt   | -2537.55828 | 13.64(0) | 4.25 | 76.76 | -224.90 |
| $\text{HASO}_4^{2-}$       | $C_1$ | B3LYP | Klamt   | -2537.51531 | 13.93(0) | 4.15 | 76.06 | -216.23 |
| $\text{H}_2\text{AsO}_4^-$ | $C_1$ | B3LYP | Klamt   | -2538.28696 | 21.03(0) | 4.62 | 79.12 | -58.82  |
| $\text{H}_3\text{AsO}_4$   | $C_1$ | B3LYP | Klamt   | -2538.81779 | 27.72(0) | 5.36 | 86.16 | -8.51   |
| ${}^f\text{AsO}_4^{3-}$    | $T_d$ | PBE   | UFF     | -2535.87351 | 6.37(0)  | 3.84 | 69.35 | -504.20 |
| ${}^g\text{HASO}_4^{2-}$   | $C_1$ | PBE   | UFF     | -2536.88970 | 13.07(0) | 4.36 | 77.48 | -221.20 |
| $\text{HASO}_4^{2-}$       | $C_1$ | PBE   | UFF     | -2536.84167 | 13.39(0) | 4.23 | 76.64 | -211.49 |
| $\text{H}_2\text{AsO}_4^-$ | $C_1$ | PBE   | UFF     | -2537.61438 | 20.27(0) | 4.72 | 79.87 | -54.94  |
| $\text{H}_3\text{AsO}_4$   | $C_1$ | PBE   | UFF     | -2538.14256 | 27.06(0) | 5.34 | 85.04 | -4.27   |
| ${}^f\text{AsO}_4^{3-}$    | $T_d$ | PBE   | UAKS    | -2535.87351 | 6.37(0)  | 3.84 | 69.35 | -514.20 |
| ${}^g\text{HASO}_4^{2-}$   | $C_1$ | PBE   | UAKS    | -2536.88970 | 13.07(0) | 4.36 | 77.48 | -227.60 |
| $\text{HASO}_4^{2-}$       | $C_1$ | PBE   | UAKS    | -2536.84167 | 13.39(0) | 4.23 | 76.64 | -218.81 |
| $\text{H}_2\text{AsO}_4^-$ | $C_1$ | PBE   | UAKS    | -2537.61438 | 20.27(0) | 4.72 | 79.87 | -63.24  |
| $\text{H}_3\text{AsO}_4$   | $C_1$ | PBE   | UAKS    | -2538.14256 | 27.06(0) | 5.34 | 85.04 | -14.98  |
| ${}^f\text{AsO}_4^{3-}$    | $T_d$ | PBE   | Pauling | -2535.87351 | 6.37(0)  | 3.84 | 69.35 | -540.70 |
| ${}^g\text{HASO}_4^{2-}$   | $C_1$ | PBE   | Pauling | -2536.88970 | 13.07(0) | 4.36 | 77.48 | -241.70 |

|                                              |                |       |         |             |          |      |       |         |
|----------------------------------------------|----------------|-------|---------|-------------|----------|------|-------|---------|
| HAsO <sub>4</sub> <sup>2-</sup>              | C <sub>1</sub> | PBE   | Pauling | -2536.84167 | 13.39(0) | 4.23 | 76.64 | -227.06 |
| H <sub>2</sub> AsO <sub>4</sub> <sup>-</sup> | C <sub>1</sub> | PBE   | Pauling | -2537.61438 | 20.27(0) | 4.72 | 79.87 | -65.50  |
| H <sub>3</sub> AsO <sub>4</sub>              | C <sub>1</sub> | PBE   | Pauling | -2538.14256 | 27.06(0) | 5.34 | 85.04 | -15.74  |
| <sup>f</sup> AsO <sub>4</sub> <sup>3-</sup>  | T <sub>d</sub> | PBE   | Klamt   | -2535.87355 | 6.37(0)  | 3.85 | 69.38 | -505.80 |
| <sup>g</sup> HAsO <sub>4</sub> <sup>2-</sup> | C <sub>1</sub> | PBE   | Klamt   | -2536.88970 | 13.07(0) | 4.36 | 77.47 | -223.00 |
| HAsO <sub>4</sub> <sup>2-</sup>              | C <sub>1</sub> | PBE   | Klamt   | -2536.84167 | 13.39(0) | 4.23 | 76.64 | -213.19 |
| H <sub>2</sub> AsO <sub>4</sub> <sup>-</sup> | C <sub>1</sub> | PBE   | Klamt   | -2537.61438 | 20.28(0) | 4.72 | 79.85 | -56.82  |
| H <sub>3</sub> AsO <sub>4</sub>              | C <sub>1</sub> | PBE   | Klamt   | -2538.14256 | 27.06(0) | 5.34 | 85.04 | -7.23   |
| <sup>f</sup> AsO <sub>4</sub> <sup>3-</sup>  | T <sub>d</sub> | BVP86 | UFF     | -2536.83066 | 6.33(0)  | 3.86 | 69.43 | -504.0  |
| <sup>g</sup> HAsO <sub>4</sub> <sup>2-</sup> | C <sub>1</sub> | BVP86 | UFF     | -2537.84094 | 13.04(0) | 4.36 | 77.51 | -221.2  |
| HAsO <sub>4</sub> <sup>2-</sup>              | C <sub>1</sub> | BVP86 | UFF     | -2537.79724 | 13.35(0) | 4.24 | 76.71 | -212.09 |
| H <sub>2</sub> AsO <sub>4</sub> <sup>-</sup> | C <sub>1</sub> | BVP86 | UFF     | -2538.56651 | 20.23(0) | 4.73 | 79.92 | -55.31  |
| H <sub>3</sub> AsO <sub>4</sub>              | C <sub>1</sub> | BVP86 | UFF     | -2539.09445 | 26.84(0) | 5.43 | 88.35 | -4.19   |
| <sup>f</sup> AsO <sub>4</sub> <sup>3-</sup>  | T <sub>d</sub> | BVP86 | UAKS    | -2536.83066 | 6.33(0)  | 3.86 | 69.43 | -514.30 |
| <sup>g</sup> HAsO <sub>4</sub> <sup>2-</sup> | C <sub>1</sub> | BVP86 | UAKS    | -2537.84094 | 13.04(0) | 4.36 | 77.51 | -227.70 |
| HAsO <sub>4</sub> <sup>2-</sup>              | C <sub>1</sub> | BVP86 | UAKS    | -2537.79724 | 13.35(0) | 4.24 | 76.71 | -219.74 |
| H <sub>2</sub> AsO <sub>4</sub> <sup>-</sup> | C <sub>1</sub> | BVP86 | UAKS    | -2538.56651 | 20.23(0) | 4.73 | 79.92 | -63.58  |
| H <sub>3</sub> AsO <sub>4</sub>              | C <sub>1</sub> | BVP86 | UAKS    | -2539.09445 | 26.84(0) | 5.44 | 88.49 | -15.07  |
| <sup>f</sup> AsO <sub>4</sub> <sup>3-</sup>  | T <sub>d</sub> | BVP86 | Pauling | -2536.83066 | 6.33(0)  | 3.86 | 69.43 | -540.60 |
| <sup>g</sup> HAsO <sub>4</sub> <sup>2-</sup> | C <sub>1</sub> | BVP86 | Pauling | -2537.84094 | 13.04(0) | 4.36 | 77.51 | -241.80 |
| HAsO <sub>4</sub> <sup>2-</sup>              | C <sub>1</sub> | BVP86 | Pauling | -2537.79724 | 13.35(0) | 4.24 | 76.71 | -228.36 |
| H <sub>2</sub> AsO <sub>4</sub> <sup>-</sup> | C <sub>1</sub> | BVP86 | Pauling | -2538.56651 | 20.23(0) | 4.73 | 79.92 | -66.15  |
| H <sub>3</sub> AsO <sub>4</sub>              | C <sub>1</sub> | BVP86 | Pauling | -2539.09445 | 26.84(0) | 5.44 | 88.50 | -15.75  |
| <sup>f</sup> AsO <sub>4</sub> <sup>3-</sup>  | T <sub>d</sub> | BVP86 | Klamt   | -2536.83066 | 6.33(0)  | 3.86 | 69.43 | -505.50 |
| <sup>g</sup> HAsO <sub>4</sub> <sup>2-</sup> | C <sub>1</sub> | BVP86 | Klamt   | -2537.84094 | 13.04(0) | 4.36 | 77.51 | -223.00 |
| HAsO <sub>4</sub> <sup>2-</sup>              | C <sub>1</sub> | BVP86 | Klamt   | -2537.79724 | 13.34(0) | 4.24 | 76.72 | -214.11 |
| H <sub>2</sub> AsO <sub>4</sub> <sup>-</sup> | C <sub>1</sub> | BVP86 | Klamt   | -2538.56651 | 20.23(0) | 4.73 | 79.91 | -57.20  |
| H <sub>3</sub> AsO <sub>4</sub>              | C <sub>1</sub> | BVP86 | Klamt   | -2539.09445 | 26.84(0) | 5.43 | 88.36 | -7.30   |
| <sup>f</sup> AsO <sub>4</sub> <sup>3-</sup>  | T <sub>d</sub> | M052X | UFF     | -2536.44668 | 7.24(0)  | 3.61 | 67.90 | -506.60 |
| <sup>g</sup> HAsO <sub>4</sub> <sup>2-</sup> | C <sub>1</sub> | M052X | UFF     | -2537.43643 | 14.34(0) | 4.09 | 75.68 | -225.20 |
| HAsO <sub>4</sub> <sup>2-</sup>              | C <sub>1</sub> | M052X | UFF     | -2537.40369 | 14.53(0) | 4.03 | 75.32 | -219.01 |
| H <sub>2</sub> AsO <sub>4</sub> <sup>-</sup> | C <sub>1</sub> | M052X | UFF     | -2538.16531 | 21.77(0) | 4.45 | 77.95 | -59.04  |
| H <sub>3</sub> AsO <sub>4</sub>              | C <sub>1</sub> | M052X | UFF     | -2538.69550 | 28.20(0) | 5.33 | 86.92 | -6.31   |
| <sup>f</sup> AsO <sub>4</sub> <sup>3-</sup>  | T <sub>d</sub> | M052X | UAKS    | -2536.44668 | 7.24(0)  | 3.61 | 67.90 | -518.90 |
| <sup>g</sup> HAsO <sub>4</sub> <sup>2-</sup> | C <sub>1</sub> | M052X | UAKS    | -2537.43643 | 14.34(0) | 4.09 | 75.68 | -233.00 |
| HAsO <sub>4</sub> <sup>2-</sup>              | C <sub>1</sub> | M052X | UAKS    | -2537.40369 | 14.53(0) | 4.03 | 75.32 | -227.13 |
| H <sub>2</sub> AsO <sub>4</sub> <sup>-</sup> | C <sub>1</sub> | M052X | UAKS    | -2538.16531 | 21.77(0) | 4.45 | 77.95 | -67.80  |
| H <sub>3</sub> AsO <sub>4</sub>              | C <sub>1</sub> | M052X | UAKS    | -2538.69550 | 28.20(0) | 5.33 | 86.92 | -16.96  |
| <sup>f</sup> AsO <sub>4</sub> <sup>3-</sup>  | T <sub>d</sub> | M052X | Pauling | -2536.44668 | 7.24(0)  | 3.61 | 67.90 | -546.30 |
| <sup>g</sup> HAsO <sub>4</sub> <sup>2-</sup> | C <sub>1</sub> | M052X | Pauling | -2537.43643 | 14.34(0) | 4.09 | 75.68 | -248.70 |
| HAsO <sub>4</sub> <sup>2-</sup>              | C <sub>1</sub> | M052X | Pauling | -2537.40369 | 14.53(0) | 4.03 | 75.32 | -238.91 |
| H <sub>2</sub> AsO <sub>4</sub> <sup>-</sup> | C <sub>1</sub> | M052X | Pauling | -2538.16531 | 21.77(0) | 4.45 | 77.95 | -72.55  |
| H <sub>3</sub> AsO <sub>4</sub>              | C <sub>1</sub> | M052X | Pauling | -2538.69550 | 28.20(0) | 5.33 | 86.92 | -19.02  |
| <sup>f</sup> AsO <sub>4</sub> <sup>3-</sup>  | T <sub>d</sub> | M052X | Klamt   | -2536.44668 | 7.24(0)  | 3.61 | 67.90 | -508.50 |
| <sup>g</sup> HAsO <sub>4</sub> <sup>2-</sup> | C <sub>1</sub> | M052X | Klamt   | -2537.43643 | 14.35(0) | 4.09 | 75.68 | -227.30 |
| HAsO <sub>4</sub> <sup>2-</sup>              | C <sub>1</sub> | M052X | Klamt   | -2537.40369 | 14.53(0) | 4.03 | 75.32 | -221.04 |

|                                              |                |       |         |             |             |      |       |         |
|----------------------------------------------|----------------|-------|---------|-------------|-------------|------|-------|---------|
| H <sub>2</sub> AsO <sub>4</sub> <sup>-</sup> | C <sub>1</sub> | M052X | Klamt   | -2538.16531 | 21.76 (0)   | 4.45 | 77.96 | -61.16  |
| H <sub>3</sub> AsO <sub>4</sub>              | C <sub>1</sub> | M052X | Klamt   | -2538.69551 | 28.24 (0)   | 5.29 | 85.91 | -9.59   |
| <sup>f</sup> VO <sub>4</sub> <sup>3-</sup>   | T <sub>d</sub> | B3LYP | UFF     | -1244.81570 | 6.26 (0)    | 3.95 | 69.55 | -485.45 |
| <sup>g</sup> HVO <sub>4</sub> <sup>2-</sup>  | C <sub>1</sub> | B3LYP | UFF     | -1245.76232 | 13.33 (0)   | 4.46 | 78.03 | -216.19 |
| HVO <sub>4</sub> <sup>2-</sup>               | C <sub>1</sub> | B3LYP | UFF     | -1245.78414 | 13.26 (0)   | 4.45 | 77.81 | -211.93 |
| H <sub>2</sub> VO <sub>4</sub> <sup>-</sup>  | C <sub>1</sub> | B3LYP | UFF     | -1246.52079 | 20.27 (0)   | 4.82 | 79.91 | -54.48  |
| H <sub>3</sub> VO <sub>4</sub>               | C <sub>1</sub> | B3LYP | UFF     | -1247.05254 | 27.39 (0)   | 5.01 | 80.63 | -1.83   |
| <sup>f</sup> VO <sub>4</sub> <sup>3-</sup>   | T <sub>d</sub> | B3LYP | UAKS    | -1244.81570 | 6.26 (0)    | 3.95 | 69.55 | -507.32 |
| <sup>g</sup> HVO <sub>4</sub> <sup>2-</sup>  | C <sub>1</sub> | B3LYP | UAKS    | -1245.76232 | 13.33 (0)   | 4.46 | 78.03 | -226.81 |
| HVO <sub>4</sub> <sup>2-</sup>               | C <sub>1</sub> | B3LYP | UAKS    | -1245.78414 | 13.26 (0)   | 4.45 | 77.81 | -222.09 |
| H <sub>2</sub> VO <sub>4</sub> <sup>-</sup>  | C <sub>1</sub> | B3LYP | UAKS    | -1246.52079 | 20.27 (0)   | 4.82 | 79.91 | -62.68  |
| H <sub>3</sub> VO <sub>4</sub>               | C <sub>1</sub> | B3LYP | UAKS    | -1247.05254 | 27.39 (0)   | 5.01 | 80.63 | -11.45  |
| <sup>f</sup> VO <sub>4</sub> <sup>3-</sup>   | T <sub>d</sub> | B3LYP | Pauling | -1244.81570 | 6.26 (0)    | 3.95 | 69.55 | -519.70 |
| <sup>g</sup> HVO <sub>4</sub> <sup>2-</sup>  | C <sub>1</sub> | B3LYP | Pauling | -1245.76232 | 13.33 (0)   | 4.46 | 78.03 | -236.85 |
| HVO <sub>4</sub> <sup>2-</sup>               | C <sub>1</sub> | B3LYP | Pauling | -1245.78414 | 13.26 (0)   | 4.45 | 77.81 | -230.53 |
| H <sub>2</sub> VO <sub>4</sub> <sup>-</sup>  | C <sub>1</sub> | B3LYP | Pauling | -1246.52079 | 20.27 (0)   | 4.82 | 79.91 | -67.90  |
| H <sub>3</sub> VO <sub>4</sub>               | C <sub>1</sub> | B3LYP | Pauling | -1247.05254 | 27.39 (0)   | 5.01 | 80.63 | -17.67  |
| <sup>f</sup> VO <sub>4</sub> <sup>3-</sup>   | T <sub>d</sub> | B3LYP | Klamt   | -1244.81570 | 6.26 (0)    | 3.95 | 69.55 | -489.34 |
| <sup>g</sup> HVO <sub>4</sub> <sup>2-</sup>  | C <sub>1</sub> | B3LYP | Klamt   | -1245.76232 | 13.33 (0)   | 4.46 | 78.03 | -218.90 |
| HVO <sub>4</sub> <sup>2-</sup>               | C <sub>1</sub> | B3LYP | Klamt   | -1245.78414 | 13.26 (0)   | 4.45 | 77.81 | -214.44 |
| H <sub>2</sub> VO <sub>4</sub> <sup>-</sup>  | C <sub>1</sub> | B3LYP | Klamt   | -1246.52079 | 20.27 (0)   | 4.82 | 79.91 | -56.62  |
| H <sub>3</sub> VO <sub>4</sub>               | C <sub>1</sub> | B3LYP | Klamt   | -1247.05254 | 27.39 (0)   | 5.01 | 80.63 | -4.42   |
| <sup>f</sup> VO <sub>4</sub> <sup>3-</sup>   | T <sub>d</sub> | PBE   | UFF     | -1244.32023 | 5.81 (0)    | 4.11 | 70.59 | -480.70 |
| <sup>g</sup> HVO <sub>4</sub> <sup>2-</sup>  | C <sub>1</sub> | PBE   | UFF     | -1245.25895 | 12.86 (0)   | 4.52 | 78.41 | -214.29 |
| HVO <sub>4</sub> <sup>2-</sup>               | C <sub>1</sub> | PBE   | UFF     | -1245.28270 | 12.77 (0)   | 4.52 | 78.31 | -209.28 |
| H <sub>2</sub> VO <sub>4</sub> <sup>-</sup>  | C <sub>1</sub> | PBE   | UFF     | -1246.01480 | 19.76 (0)   | 4.83 | 79.96 | -52.94  |
| H <sub>3</sub> VO <sub>4</sub>               | C <sub>1</sub> | PBE   | UFF     | -1246.54449 | 26.59 (0) / | 5.11 | 81.32 | -1.18   |
| <sup>f</sup> VO <sub>4</sub> <sup>3-</sup>   | T <sub>d</sub> | PBE   | UAKS    | -1244.32023 | 5.81 (0)    | 4.11 | 70.59 | -501.74 |
| <sup>g</sup> HVO <sub>4</sub> <sup>2-</sup>  | C <sub>1</sub> | PBE   | UAKS    | -1245.25895 | 12.86 (0)   | 4.52 | 78.41 | -224.79 |
| HVO <sub>4</sub> <sup>2-</sup>               | C <sub>1</sub> | PBE   | UAKS    | -1245.28270 | 12.77 (0)   | 4.52 | 78.31 | -219.68 |
| H <sub>2</sub> VO <sub>4</sub> <sup>-</sup>  | C <sub>1</sub> | PBE   | UAKS    | -1246.01480 | 19.76 (0)   | 4.83 | 79.96 | -61.89  |
| H <sub>3</sub> VO <sub>4</sub>               | C <sub>1</sub> | PBE   | UAKS    | -1246.54449 | 26.59 (0)   | 5.11 | 81.32 | -11.34  |
| <sup>f</sup> VO <sub>4</sub> <sup>3-</sup>   | T <sub>d</sub> | PBE   | Pauling | -1244.32023 | 5.81 (0)    | 4.11 | 70.59 | -512.62 |
| <sup>g</sup> HVO <sub>4</sub> <sup>2-</sup>  | C <sub>1</sub> | PBE   | Pauling | -1245.25895 | 12.86 (0)   | 4.52 | 78.41 | -233.25 |
| HVO <sub>4</sub> <sup>2-</sup>               | C <sub>1</sub> | PBE   | Pauling | -1245.28270 | 12.77 (0)   | 4.52 | 78.31 | -226.29 |
| H <sub>2</sub> VO <sub>4</sub> <sup>-</sup>  | C <sub>1</sub> | PBE   | Pauling | -1246.01480 | 19.76 (0)   | 4.83 | 79.96 | -65.45  |
| H <sub>3</sub> VO <sub>4</sub>               | C <sub>1</sub> | PBE   | Pauling | -1246.54449 | 26.59 (0)   | 5.11 | 81.32 | -16.03  |
| <sup>f</sup> VO <sub>4</sub> <sup>3-</sup>   | T <sub>d</sub> | PBE   | Klamt   | -1244.32023 | 5.81 (0)    | 4.11 | 70.59 | -484.44 |
| <sup>g</sup> HVO <sub>4</sub> <sup>2-</sup>  | C <sub>1</sub> | PBE   | Klamt   | -1245.25895 | 12.86 (0)   | 4.52 | 78.41 | -216.83 |
| HVO <sub>4</sub> <sup>2-</sup>               | C <sub>1</sub> | PBE   | Klamt   | -1245.28270 | 12.77 (0)   | 4.52 | 78.31 | -211.94 |
| H <sub>2</sub> VO <sub>4</sub> <sup>-</sup>  | C <sub>1</sub> | PBE   | Klamt   | -1246.01480 | 19.76 (0)   | 4.83 | 79.96 | -55.53  |
| H <sub>3</sub> VO <sub>4</sub>               | C <sub>1</sub> | PBE   | Klamt   | -1246.54449 | 26.59 (0)   | 5.11 | 81.32 | -3.54   |
| <sup>f</sup> VO <sub>4</sub> <sup>3-</sup>   | T <sub>d</sub> | BVP86 | UFF     | -1245.02310 | 5.87 (0)    | 4.08 | 70.45 | -482.32 |
| <sup>g</sup> HVO <sub>4</sub> <sup>2-</sup>  | C <sub>1</sub> | BVP86 | UFF     | -1245.96247 | 12.86 (0)   | 4.52 | 78.41 | -215.04 |
| HVO <sub>4</sub> <sup>2-</sup>               | C <sub>1</sub> | BVP86 | UFF     | -1245.98462 | 12.78 (0)   | 4.52 | 78.26 | -210.27 |
| H <sub>2</sub> VO <sub>4</sub> <sup>-</sup>  | C <sub>1</sub> | BVP86 | UFF     | -1246.71741 | 19.80 (0)   | 4.80 | 79.72 | -53.33  |
| H <sub>3</sub> VO <sub>4</sub>               | C <sub>1</sub> | BVP86 | UFF     | -1247.24778 | 26.24 (0)   | 5.23 | 82.18 | -1.08   |

|                                               |          |       |         |             |          |      |       |         |
|-----------------------------------------------|----------|-------|---------|-------------|----------|------|-------|---------|
| ${}^f\text{VO}_4^{3-}$                        | $T_d$    | BVP86 | UAKS    | -1245.02310 | 5.87(0)  | 4.08 | 70.45 | -503.57 |
| ${}^g\text{HVO}_4^{2-}$                       | $C_1$    | BVP86 | UAKS    | -1245.96247 | 12.86(0) | 4.52 | 78.41 | -225.64 |
| $\text{HVO}_4^{2-}$                           | $C_1$    | BVP86 | UAKS    | -1245.98462 | 12.78(0) | 4.52 | 78.26 | -220.72 |
| $\text{H}_2\text{VO}_4^-$                     | $C_1$    | BVP86 | UAKS    | -1246.71741 | 19.80(0) | 4.80 | 79.72 | -62.36  |
| $\text{H}_3\text{VO}_4$                       | $C_1$    | BVP86 | UAKS    | -1247.24778 | 26.24(0) | 5.23 | 82.18 | -11.34  |
| ${}^f\text{VO}_4^{3-}$                        | $T_d$    | BVP86 | Pauling | -1245.02310 | 5.87(0)  | 4.08 | 70.45 | -227.69 |
| ${}^g\text{HVO}_4^{2-}$                       | $C_1$    | BVP86 | Pauling | -1245.96247 | 12.86(0) | 4.52 | 78.41 | -514.65 |
| $\text{HVO}_4^{2-}$                           | $C_1$    | BVP86 | Pauling | -1245.98462 | 12.78(0) | 4.52 | 78.26 | -234.12 |
| $\text{H}_2\text{VO}_4^-$                     | $C_1$    | BVP86 | Pauling | -1246.71741 | 19.80(0) | 4.80 | 79.72 | -66.18  |
| $\text{H}_3\text{VO}_4$                       | $C_1$    | BVP86 | Pauling | -1247.24778 | 26.24(0) | 5.23 | 82.18 | -16.07  |
| ${}^f\text{VO}_4^{3-}$                        | $T_d$    | BVP86 | Klamt   | -1245.02310 | 5.87(0)  | 4.08 | 70.45 | -486.08 |
| ${}^g\text{HVO}_4^{2-}$                       | $C_1$    | BVP86 | Klamt   | -1245.96247 | 12.86(0) | 4.52 | 78.41 | -217.60 |
| $\text{HVO}_4^{2-}$                           | $C_1$    | BVP86 | Klamt   | -1245.98462 | 12.78(0) | 4.52 | 78.26 | -212.96 |
| $\text{H}_2\text{VO}_4^-$                     | $C_1$    | BVP86 | Klamt   | -1246.71741 | 19.80(0) | 4.80 | 79.72 | -55.43  |
| $\text{H}_3\text{VO}_4$                       | $C_1$    | BVP86 | Klamt   | -1247.24778 | 26.24(0) | 5.23 | 82.18 | -3.80   |
| ${}^f\text{VO}_4^{3-}$                        | $T_d$    | M052X | UFF     | -1244.65486 | 6.80(0)  | 3.79 | 68.44 | -493.27 |
| ${}^g\text{HVO}_4^{2-}$                       | $C_1$    | M052X | UFF     | -1245.60439 | 13.86(0) | 4.32 | 76.99 | -219.36 |
| $\text{HVO}_4^{2-}$                           | $C_1$    | M052X | UFF     | -1245.62233 | 13.75(0) | 4.34 | 77.07 | -216.02 |
| $\text{H}_2\text{VO}_4^-$                     | $C_1$    | M052X | UFF     | -1246.36080 | 20.95(0) | 4.64 | 78.57 | -55.70  |
| $\text{H}_3\text{VO}_4$                       | $C_1$    | M052X | UFF     | -1246.89071 | 27.86(0) | 4.97 | 80.27 | -2.37   |
| ${}^f\text{VO}_4^{3-}$                        | $T_d$    | M052X | UAKS    | -1244.65486 | 6.80(0)  | 3.79 | 68.44 | -510.97 |
| ${}^g\text{HVO}_4^{2-}$                       | $C_1$    | M052X | UAKS    | -1245.60439 | 13.86(0) | 4.32 | 76.99 | -230.39 |
| $\text{HVO}_4^{2-}$                           | $C_1$    | M052X | UAKS    | -1245.62233 | 13.75(0) | 4.34 | 77.07 | -226.78 |
| $\text{H}_2\text{VO}_4^-$                     | $C_1$    | M052X | UAKS    | -1246.36080 | 20.95(0) | 4.64 | 78.57 | -64.14  |
| $\text{H}_3\text{VO}_4$                       | $C_1$    | M052X | UAKS    | -1246.89071 | 27.86(0) | 4.97 | 80.27 | -12.11  |
| ${}^f\text{VO}_4^{3-}$                        | $T_d$    | M052X | Pauling | -1244.65486 | 6.80(0)  | 3.79 | 68.44 | -524.67 |
| ${}^g\text{HVO}_4^{2-}$                       | $C_1$    | M052X | Pauling | -1245.60439 | 13.86(0) | 4.32 | 76.99 | -241.51 |
| $\text{HVO}_4^{2-}$                           | $C_1$    | M052X | Pauling | -1245.62233 | 13.75(0) | 4.34 | 77.07 | -236.51 |
| $\text{H}_2\text{VO}_4^-$                     | $C_1$    | M052X | Pauling | -1246.36080 | 20.95(0) | 4.64 | 78.57 | -70.22  |
| $\text{H}_3\text{VO}_4$                       | $C_1$    | M052X | Pauling | -1246.89071 | 27.86(0) | 4.97 | 80.27 | -18.64  |
| ${}^f\text{VO}_4^{3-}$                        | $T_d$    | M052X | Klamt   | -1244.65486 | 6.80(0)  | 3.79 | 68.44 | -497.18 |
| ${}^g\text{HVO}_4^{2-}$                       | $C_1$    | M052X | Klamt   | -1245.60439 | 13.86(0) | 4.32 | 76.99 | -222.10 |
| $\text{HVO}_4^{2-}$                           | $C_1$    | M052X | Klamt   | -1245.62233 | 13.75(0) | 4.34 | 77.07 | -218.61 |
| $\text{H}_2\text{VO}_4^-$                     | $C_1$    | M052X | Klamt   | -1246.36080 | 20.95(0) | 4.64 | 78.57 | -58.11  |
| $\text{H}_3\text{VO}_4$                       | $C_1$    | M052X | Klamt   | -1246.89071 | 27.86(0) | 4.97 | 80.27 | -5.07   |
| ${}^f\text{C}_5\text{H}_2\text{NO}_3^{3-}$    | $C_{2v}$ | B3LYP | UFF     | -471.99272  | 38.50(0) | 4.74 | 80.34 | -436.11 |
| ${}^g\text{HC}_5\text{H}_2\text{NO}_3^{2-}$   | $C_{2v}$ | B3LYP | UFF     | -472.91285  | 47.37(0) | 4.93 | 81.53 | -192.40 |
| $\text{HC}_5\text{H}_2\text{NO}_3^{2-}$       | $C_{2v}$ | B3LYP | UFF     | -472.94381  | 47.26(0) | 4.93 | 81.51 | -187.39 |
| $\text{H}_2\text{C}_5\text{H}_2\text{NO}_3^-$ | $C_s$    | B3LYP | UFF     | -473.63940  | 55.62(0) | 5.14 | 83.88 | -52.40  |
| $\text{H}_3\text{C}_5\text{H}_2\text{NO}_3$   | $C_s$    | B3LYP | UFF     | -474.16500  | 63.98(0) | 5.29 | 84.60 | -7.35   |
| ${}^f\text{C}_5\text{H}_2\text{NO}_3^{3-}$    | $C_{2v}$ | B3LYP | UAKS    | -471.99272  | 38.50(0) | 4.74 | 80.34 | -452.28 |
| ${}^g\text{HC}_5\text{H}_2\text{NO}_3^{2-}$   | $C_{2v}$ | B3LYP | UAKS    | -472.91285  | 47.37(0) | 4.93 | 81.53 | -202.11 |
| $\text{HC}_5\text{H}_2\text{NO}_3^{2-}$       | $C_{2v}$ | B3LYP | UAKS    | -472.94381  | 47.26(0) | 4.93 | 81.51 | -197.45 |
| $\text{H}_2\text{C}_5\text{H}_2\text{NO}_3^-$ | $C_s$    | B3LYP | UAKS    | -473.63940  | 55.62(0) | 5.14 | 83.88 | -62.84  |
| $\text{H}_3\text{C}_5\text{H}_2\text{NO}_3$   | $C_s$    | B3LYP | UAKS    | -474.16500  | 63.98(0) | 5.29 | 84.60 | -20.66  |
| ${}^f\text{C}_5\text{H}_2\text{NO}_3^{3-}$    | $C_{2v}$ | B3LYP | Pauling | -471.99272  | 38.50(0) | 4.74 | 80.34 | -465.51 |
| ${}^g\text{HC}_5\text{H}_2\text{NO}_3^{2-}$   | $C_{2v}$ | B3LYP | Pauling | -472.91285  | 47.37(0) | 4.93 | 81.53 | -210.31 |



|                                                                           |                 |       |         |            |          |      |       |         |
|---------------------------------------------------------------------------|-----------------|-------|---------|------------|----------|------|-------|---------|
| HC <sub>5</sub> H <sub>2</sub> NO <sub>3</sub> <sup>2-</sup>              | C <sub>2v</sub> | B3LYP | Pauling | -472.94381 | 47.26(0) | 4.93 | 81.51 | -202.95 |
| H <sub>2</sub> C <sub>5</sub> H <sub>2</sub> NO <sub>3</sub> <sup>-</sup> | C <sub>s</sub>  | B3LYP | Pauling | -473.63940 | 55.62(0) | 5.14 | 83.88 | -63.96  |
| H <sub>3</sub> C <sub>5</sub> H <sub>2</sub> NO <sub>3</sub>              | C <sub>s</sub>  | B3LYP | Pauling | -474.16500 | 63.98(0) | 5.29 | 84.60 | -20.62  |
| <sup>f</sup> C <sub>5</sub> H <sub>2</sub> NO <sub>3</sub> <sup>3-</sup>  | C <sub>2v</sub> | B3LYP | Klamt   | -471.99272 | 38.50(0) | 4.74 | 80.34 | -437.44 |
| <sup>g</sup> HC <sub>5</sub> H <sub>2</sub> NO <sub>3</sub> <sup>2-</sup> | C <sub>2v</sub> | B3LYP | Klamt   | -472.91285 | 47.37(0) | 4.93 | 81.53 | -194.71 |
| HC <sub>5</sub> H <sub>2</sub> NO <sub>3</sub> <sup>2-</sup>              | C <sub>2v</sub> | B3LYP | Klamt   | -472.94381 | 47.26(0) | 4.93 | 81.51 | -189.10 |
| H <sub>2</sub> C <sub>5</sub> H <sub>2</sub> NO <sub>3</sub> <sup>-</sup> | C <sub>s</sub>  | B3LYP | Klamt   | -473.63940 | 55.62(0) | 5.14 | 83.88 | -55.17  |
| H <sub>3</sub> C <sub>5</sub> H <sub>2</sub> NO <sub>3</sub>              | C <sub>s</sub>  | B3LYP | Klamt   | -474.16500 | 63.98(0) | 5.29 | 84.60 | -11.40  |
| <sup>f</sup> C <sub>5</sub> H <sub>2</sub> NO <sub>3</sub> <sup>3-</sup>  | C <sub>2v</sub> | B3LYP | SMD     | -471.99272 | 38.50(0) | 4.74 | 80.34 | -455.62 |
| <sup>g</sup> HC <sub>5</sub> H <sub>2</sub> NO <sub>3</sub> <sup>2-</sup> | C <sub>2v</sub> | B3LYP | SMD     | -472.91285 | 47.37(0) | 4.93 | 81.53 | -204.61 |
| HC <sub>5</sub> H <sub>2</sub> NO <sub>3</sub> <sup>2-</sup>              | C <sub>2v</sub> | B3LYP | SMD     | -472.94381 | 47.26(0) | 4.93 | 81.51 | -198.31 |
| H <sub>2</sub> C <sub>5</sub> H <sub>2</sub> NO <sub>3</sub> <sup>-</sup> | C <sub>s</sub>  | B3LYP | SMD     | -473.63940 | 55.62(0) | 5.14 | 83.88 | -60.92  |
| H <sub>3</sub> C <sub>5</sub> H <sub>2</sub> NO <sub>3</sub>              | C <sub>s</sub>  | B3LYP | SMD     | -474.16500 | 63.98(0) | 5.29 | 84.60 | -17.27  |
| <sup>f</sup> C <sub>5</sub> H <sub>2</sub> NO <sub>3</sub> <sup>3-</sup>  | C <sub>2v</sub> | PBE   | UFF     | -471.47103 | 37.21(0) | 4.88 | 81.24 | -434.31 |
| <sup>g</sup> HC <sub>5</sub> H <sub>2</sub> NO <sub>3</sub> <sup>2-</sup> | C <sub>2v</sub> | PBE   | UFF     | -472.38868 | 45.87(0) | 5.08 | 82.56 | -191.42 |
| HC <sub>5</sub> H <sub>2</sub> NO <sub>3</sub> <sup>2-</sup>              | C <sub>2v</sub> | PBE   | UFF     | -472.42341 | 45.76(0) | 5.09 | 82.53 | -185.30 |
| H <sub>2</sub> C <sub>5</sub> H <sub>2</sub> NO <sub>3</sub> <sup>-</sup> | C <sub>s</sub>  | PBE   | UFF     | -473.11534 | 53.92(0) | 5.29 | 84.83 | -51.25  |
| H <sub>3</sub> C <sub>5</sub> H <sub>2</sub> NO <sub>3</sub>              | C <sub>s</sub>  | PBE   | UFF     | -473.63781 | 62.11(0) | 5.44 | 85.49 | -6.60   |
| <sup>f</sup> C <sub>5</sub> H <sub>2</sub> NO <sub>3</sub> <sup>3-</sup>  | C <sub>2v</sub> | PBE   | UAKS    | -471.47103 | 37.21(0) | 4.89 | 81.24 | -451.03 |
| <sup>g</sup> HC <sub>5</sub> H <sub>2</sub> NO <sub>3</sub> <sup>2-</sup> | C <sub>2v</sub> | PBE   | UAKS    | -472.38868 | 45.87(0) | 5.08 | 82.56 | -201.36 |
| HC <sub>5</sub> H <sub>2</sub> NO <sub>3</sub> <sup>2-</sup>              | C <sub>2v</sub> | PBE   | UAKS    | -472.42341 | 45.76(0) | 5.09 | 82.53 | -195.65 |
| H <sub>2</sub> C <sub>5</sub> H <sub>2</sub> NO <sub>3</sub> <sup>-</sup> | C <sub>s</sub>  | PBE   | UAKS    | -473.11534 | 53.92(0) | 5.29 | 84.83 | -62.14  |
| H <sub>3</sub> C <sub>5</sub> H <sub>2</sub> NO <sub>3</sub>              | C <sub>s</sub>  | PBE   | UAKS    | -473.63781 | 62.11(0) | 5.44 | 85.49 | -20.56  |
| <sup>f</sup> C <sub>5</sub> H <sub>2</sub> NO <sub>3</sub> <sup>3-</sup>  | C <sub>2v</sub> | PBE   | Pauling | -471.47103 | 37.21(0) | 4.88 | 81.24 | -463.45 |
| <sup>g</sup> HC <sub>5</sub> H <sub>2</sub> NO <sub>3</sub> <sup>2-</sup> | C <sub>2v</sub> | PBE   | Pauling | -472.38868 | 45.87(0) | 5.08 | 82.56 | -208.51 |
| HC <sub>5</sub> H <sub>2</sub> NO <sub>3</sub> <sup>2-</sup>              | C <sub>2v</sub> | PBE   | Pauling | -472.42341 | 45.76(0) | 5.09 | 82.53 | -199.73 |
| H <sub>2</sub> C <sub>5</sub> H <sub>2</sub> NO <sub>3</sub> <sup>-</sup> | C <sub>s</sub>  | PBE   | Pauling | -473.11534 | 53.92(0) | 5.29 | 84.83 | -61.88  |
| H <sub>3</sub> C <sub>5</sub> H <sub>2</sub> NO <sub>3</sub>              | C <sub>s</sub>  | PBE   | Pauling | -473.63781 | 62.11(0) | 5.44 | 85.49 | -19.12  |
| <sup>f</sup> C <sub>5</sub> H <sub>2</sub> NO <sub>3</sub> <sup>3-</sup>  | C <sub>2v</sub> | PBE   | Klamt   | -471.47103 | 37.21(0) | 4.89 | 81.24 | -435.93 |
| <sup>g</sup> HC <sub>5</sub> H <sub>2</sub> NO <sub>3</sub> <sup>2-</sup> | C <sub>2v</sub> | PBE   | Klamt   | -472.38868 | 45.87(0) | 5.08 | 82.56 | -193.45 |
| HC <sub>5</sub> H <sub>2</sub> NO <sub>3</sub> <sup>2-</sup>              | C <sub>2v</sub> | PBE   | Klamt   | -472.42341 | 45.76(0) | 5.09 | 82.53 | -187.61 |
| H <sub>2</sub> C <sub>5</sub> H <sub>2</sub> NO <sub>3</sub> <sup>-</sup> | C <sub>s</sub>  | PBE   | Klamt   | -473.11534 | 53.92(0) | 5.29 | 84.83 | -53.97  |
| H <sub>3</sub> C <sub>5</sub> H <sub>2</sub> NO <sub>3</sub>              | C <sub>s</sub>  | PBE   | Klamt   | -473.63781 | 62.11(0) | 5.44 | 85.49 | -10.62  |
| <sup>f</sup> C <sub>5</sub> H <sub>2</sub> NO <sub>3</sub> <sup>3-</sup>  | C <sub>2v</sub> | PBE   | SMD     | -471.47103 | 37.21(0) | 4.89 | 81.24 | -453.84 |
| <sup>g</sup> HC <sub>5</sub> H <sub>2</sub> NO <sub>3</sub> <sup>2-</sup> | C <sub>2v</sub> | PBE   | SMD     | -472.38868 | 45.87(0) | 5.08 | 82.56 | -203.27 |
| HC <sub>5</sub> H <sub>2</sub> NO <sub>3</sub> <sup>2-</sup>              | C <sub>2v</sub> | PBE   | SMD     | -472.42341 | 45.76(0) | 5.09 | 82.53 | -195.82 |
| H <sub>2</sub> C <sub>5</sub> H <sub>2</sub> NO <sub>3</sub> <sup>-</sup> | C <sub>s</sub>  | PBE   | SMD     | -473.11534 | 53.92(0) | 5.29 | 84.83 | -59.58  |
| H <sub>3</sub> C <sub>5</sub> H <sub>2</sub> NO <sub>3</sub>              | C <sub>s</sub>  | PBE   | SMD     | -473.63781 | 62.11(0) | 5.44 | 85.49 | -16.52  |
| <sup>f</sup> C <sub>5</sub> H <sub>2</sub> NO <sub>3</sub> <sup>3-</sup>  | C <sub>2v</sub> | BVP86 | UFF     | -472.03715 | 37.11(0) | 4.89 | 81.28 | -434.46 |
| <sup>g</sup> HC <sub>5</sub> H <sub>2</sub> NO <sub>3</sub> <sup>2-</sup> | C <sub>2v</sub> | BVP86 | UFF     | -472.95347 | 45.76(0) | 5.09 | 82.61 | -191.43 |
| HC <sub>5</sub> H <sub>2</sub> NO <sub>3</sub> <sup>2-</sup>              | C <sub>2v</sub> | BVP86 | UFF     | -472.98480 | 45.67(0) | 5.09 | 82.53 | -186.12 |
| H <sub>2</sub> C <sub>5</sub> H <sub>2</sub> NO <sub>3</sub> <sup>-</sup> | C <sub>s</sub>  | BVP86 | UFF     | -473.67764 | 53.83(0) | 5.29 | 84.84 | -51.60  |
| H <sub>3</sub> C <sub>5</sub> H <sub>2</sub> NO <sub>3</sub>              | C <sub>s</sub>  | BVP86 | UFF     | -474.20095 | 62.00(0) | 5.44 | 85.53 | -6.71   |
| <sup>f</sup> C <sub>5</sub> H <sub>2</sub> NO <sub>3</sub> <sup>3-</sup>  | C <sub>2v</sub> | BVP86 | UAKS    | -472.03715 | 37.11(0) | 4.89 | 81.28 | -450.93 |
| <sup>g</sup> HC <sub>5</sub> H <sub>2</sub> NO <sub>3</sub> <sup>2-</sup> | C <sub>2v</sub> | BVP86 | UAKS    | -472.95347 | 45.76(0) | 5.09 | 82.61 | -201.47 |
| HC <sub>5</sub> H <sub>2</sub> NO <sub>3</sub> <sup>2-</sup>              | C <sub>2v</sub> | BVP86 | UAKS    | -472.98480 | 45.67(0) | 5.09 | 82.53 | -196.37 |
| H <sub>2</sub> C <sub>5</sub> H <sub>2</sub> NO <sub>3</sub> <sup>-</sup> | C <sub>s</sub>  | BVP86 | UAKS    | -473.67764 | 53.83(0) | 5.29 | 84.84 | -62.43  |

|                                                                           |                 |       |         |            |          |      |       |         |
|---------------------------------------------------------------------------|-----------------|-------|---------|------------|----------|------|-------|---------|
| H <sub>3</sub> C <sub>5</sub> H <sub>2</sub> NO <sub>3</sub>              | C <sub>s</sub>  | BVP86 | UAKS    | -474.20095 | 62.00(0) | 5.44 | 85.53 | -20.60  |
| <sup>f</sup> C <sub>5</sub> H <sub>2</sub> NO <sub>3</sub> <sup>3-</sup>  | C <sub>2v</sub> | BVP86 | Pauling | -472.03715 | 37.11(0) | 4.89 | 81.28 | -463.18 |
| <sup>g</sup> HC <sub>5</sub> H <sub>2</sub> NO <sub>3</sub> <sup>2-</sup> | C <sub>2v</sub> | BVP86 | Pauling | -472.95347 | 45.76(0) | 5.09 | 82.61 | -208.67 |
| HC <sub>5</sub> H <sub>2</sub> NO <sub>3</sub> <sup>2-</sup>              | C <sub>2v</sub> | BVP86 | Pauling | -472.98480 | 45.67(0) | 5.09 | 82.53 | -200.77 |
| H <sub>2</sub> C <sub>5</sub> H <sub>2</sub> NO <sub>3</sub> <sup>-</sup> | C <sub>s</sub>  | BVP86 | Pauling | -473.67764 | 53.83(0) | 5.29 | 84.84 | -62.50  |
| H <sub>3</sub> C <sub>5</sub> H <sub>2</sub> NO <sub>3</sub>              | C <sub>s</sub>  | BVP86 | Pauling | -474.20095 | 62.00(0) | 5.44 | 85.53 | -19.34  |
| <sup>f</sup> C <sub>5</sub> H <sub>2</sub> NO <sub>3</sub> <sup>3-</sup>  | C <sub>2v</sub> | BVP86 | Klamt   | -472.03715 | 37.11(0) | 4.89 | 81.27 | -435.94 |
| <sup>g</sup> HC <sub>5</sub> H <sub>2</sub> NO <sub>3</sub> <sup>2-</sup> | C <sub>2v</sub> | BVP86 | Klamt   | -472.95347 | 45.76(0) | 5.09 | 82.61 | -192.84 |
| HC <sub>5</sub> H <sub>2</sub> NO <sub>3</sub> <sup>2-</sup>              | C <sub>2v</sub> | BVP86 | Klamt   | -472.98480 | 45.67(0) | 5.09 | 82.53 | -187.62 |
| H <sub>2</sub> C <sub>5</sub> H <sub>2</sub> NO <sub>3</sub> <sup>-</sup> | C <sub>s</sub>  | BVP86 | Klamt   | -473.67764 | 53.83(0) | 5.29 | 84.84 | -54.32  |
| H <sub>3</sub> C <sub>5</sub> H <sub>2</sub> NO <sub>3</sub>              | C <sub>s</sub>  | BVP86 | Klamt   | -474.20095 | 62.00(0) | 5.44 | 85.53 | -10.72  |
| <sup>f</sup> C <sub>5</sub> H <sub>2</sub> NO <sub>3</sub> <sup>3-</sup>  | C <sub>2v</sub> | BVP86 | SMD     | -472.03715 | 37.11(0) | 4.89 | 81.27 | -453.83 |
| <sup>g</sup> HC <sub>5</sub> H <sub>2</sub> NO <sub>3</sub> <sup>2-</sup> | C <sub>2v</sub> | BVP86 | SMD     | -472.95347 | 45.76(0) | 5.09 | 82.61 | -203.47 |
| HC <sub>5</sub> H <sub>2</sub> NO <sub>3</sub> <sup>2-</sup>              | C <sub>2v</sub> | BVP86 | SMD     | -472.98480 | 45.67(0) | 5.09 | 82.53 | -196.87 |
| H <sub>2</sub> C <sub>5</sub> H <sub>2</sub> NO <sub>3</sub> <sup>-</sup> | C <sub>s</sub>  | BVP86 | SMD     | -473.67764 | 53.83(0) | 5.29 | 84.84 | -60.07  |
| H <sub>3</sub> C <sub>5</sub> H <sub>2</sub> NO <sub>3</sub>              | C <sub>s</sub>  | BVP86 | SMD     | -474.20095 | 62.00(0) | 5.44 | 85.53 | -16.65  |
| <sup>f</sup> C <sub>5</sub> H <sub>2</sub> NO <sub>3</sub> <sup>3-</sup>  | C <sub>2v</sub> | M052X | UFF     | -471.96958 | 39.63(0) | 4.66 | 79.80 | -438.44 |
| <sup>g</sup> HC <sub>5</sub> H <sub>2</sub> NO <sub>3</sub> <sup>2-</sup> | C <sub>2v</sub> | M052X | UFF     | -472.88071 | 48.49(0) | 4.86 | 81.07 | -194.17 |
| HC <sub>5</sub> H <sub>2</sub> NO <sub>3</sub> <sup>2-</sup>              | C <sub>2v</sub> | M052X | UFF     | -472.90498 | 48.40(0) | 4.85 | 81.01 | -190.63 |
| H <sub>2</sub> C <sub>5</sub> H <sub>2</sub> NO <sub>3</sub> <sup>-</sup> | C <sub>s</sub>  | M052X | UFF     | -473.59926 | 56.78(0) | 5.06 | 83.39 | -54.03  |
| H <sub>3</sub> C <sub>5</sub> H <sub>2</sub> NO <sub>3</sub>              | C <sub>s</sub>  | M052X | UFF     | -474.12290 | 65.16(0) | 5.23 | 84.24 | -8.32   |
| <sup>f</sup> C <sub>5</sub> H <sub>2</sub> NO <sub>3</sub> <sup>3-</sup>  | C <sub>2v</sub> | M052X | UAKS    | -471.96958 | 39.63(0) | 4.66 | 79.80 | -451.77 |
| <sup>g</sup> HC <sub>5</sub> H <sub>2</sub> NO <sub>3</sub> <sup>2-</sup> | C <sub>2v</sub> | M052X | UAKS    | -472.88071 | 48.49(0) | 4.86 | 81.07 | -204.41 |
| HC <sub>5</sub> H <sub>2</sub> NO <sub>3</sub> <sup>2-</sup>              | C <sub>2v</sub> | M052X | UAKS    | -472.90498 | 48.40(0) | 4.85 | 81.01 | -200.91 |
| H <sub>2</sub> C <sub>5</sub> H <sub>2</sub> NO <sub>3</sub> <sup>-</sup> | C <sub>s</sub>  | M052X | UAKS    | -473.59926 | 56.78(0) | 5.06 | 83.39 | -64.84  |
| H <sub>3</sub> C <sub>5</sub> H <sub>2</sub> NO <sub>3</sub>              | C <sub>s</sub>  | M052X | UAKS    | -474.12290 | 65.16(0) | 5.23 | 84.24 | -21.93  |
| <sup>f</sup> C <sub>5</sub> H <sub>2</sub> NO <sub>3</sub> <sup>3-</sup>  | C <sub>2v</sub> | M052X | Pauling | -471.96958 | 39.63(0) | 4.66 | 79.80 | -468.93 |
| <sup>g</sup> HC <sub>5</sub> H <sub>2</sub> NO <sub>3</sub> <sup>2-</sup> | C <sub>2v</sub> | M052X | Pauling | -472.88071 | 48.49(0) | 4.86 | 81.07 | -213.41 |
| HC <sub>5</sub> H <sub>2</sub> NO <sub>3</sub> <sup>2-</sup>              | C <sub>2v</sub> | M052X | Pauling | -472.90498 | 48.40(0) | 4.85 | 81.01 | -207.74 |
| H <sub>2</sub> C <sub>5</sub> H <sub>2</sub> NO <sub>3</sub> <sup>-</sup> | C <sub>s</sub>  | M052X | Pauling | -473.59926 | 56.78(0) | 5.06 | 83.39 | -66.81  |
| H <sub>3</sub> C <sub>5</sub> H <sub>2</sub> NO <sub>3</sub>              | C <sub>s</sub>  | M052X | Pauling | -474.12290 | 65.16(0) | 5.23 | 84.24 | -22.16  |
| <sup>f</sup> C <sub>5</sub> H <sub>2</sub> NO <sub>3</sub> <sup>3-</sup>  | C <sub>2v</sub> | M052X | Klamt   | -471.96958 | 39.63(0) | 4.66 | 79.80 | -439.97 |
| <sup>g</sup> HC <sub>5</sub> H <sub>2</sub> NO <sub>3</sub> <sup>2-</sup> | C <sub>2v</sub> | M052X | Klamt   | -472.88071 | 48.49(0) | 4.86 | 81.07 | -195.80 |
| HC <sub>5</sub> H <sub>2</sub> NO <sub>3</sub> <sup>2-</sup>              | C <sub>2v</sub> | M052X | Klamt   | -472.90498 | 48.40(0) | 4.85 | 81.01 | -192.24 |
| H <sub>2</sub> C <sub>5</sub> H <sub>2</sub> NO <sub>3</sub> <sup>-</sup> | C <sub>s</sub>  | M052X | Klamt   | -473.59926 | 56.78(0) | 5.06 | 83.39 | -56.90  |
| H <sub>3</sub> C <sub>5</sub> H <sub>2</sub> NO <sub>3</sub>              | C <sub>s</sub>  | M052X | Klamt   | -474.12290 | 65.16(0) | 5.23 | 84.24 | -12.52  |
| <sup>f</sup> C <sub>5</sub> H <sub>2</sub> NO <sub>3</sub> <sup>3-</sup>  | C <sub>2v</sub> | M052X | SMD     | -471.96958 | 39.63(0) | 4.66 | 79.80 | -458.50 |
| <sup>g</sup> HC <sub>5</sub> H <sub>2</sub> NO <sub>3</sub> <sup>2-</sup> | C <sub>2v</sub> | M052X | SMD     | -472.88071 | 48.49(0) | 4.86 | 81.07 | -207.00 |
| HC <sub>5</sub> H <sub>2</sub> NO <sub>3</sub> <sup>2-</sup>              | C <sub>2v</sub> | M052X | SMD     | -472.90498 | 48.40(0) | 4.85 | 81.01 | -202.40 |
| H <sub>2</sub> C <sub>5</sub> H <sub>2</sub> NO <sub>3</sub> <sup>-</sup> | C <sub>s</sub>  | M052X | SMD     | -473.59926 | 56.78(0) | 5.06 | 83.39 | -63.19  |
| H <sub>3</sub> C <sub>5</sub> H <sub>2</sub> NO <sub>3</sub>              | C <sub>s</sub>  | M052X | SMD     | -474.12290 | 65.16(0) | 5.23 | 84.24 | -18.53  |
| Q_D2 <sup>h</sup>                                                         | C <sub>s</sub>  | B3LYP | UFF     | -472.90361 | 46.52(0) | 5.07 | 83.54 | -196.66 |
| Q_D3                                                                      | C <sub>1</sub>  | B3LYP | UFF     | -472.89667 | 46.35(0) | 5.10 | 83.72 | -200.27 |
| Q_M2                                                                      | C <sub>s</sub>  | B3LYP | UFF     | -473.61791 | 55.30(0) | 5.26 | 84.72 | -57.33  |
| Q_M3                                                                      | C <sub>2v</sub> | B3LYP | UFF     | -473.62107 | 55.61(0) | 5.09 | 81.99 | -52.41  |
| Q_M4                                                                      | C <sub>s</sub>  | B3LYP | UFF     | -473.60397 | 54.99(0) | 5.27 | 84.54 | -59.83  |
| Q_N2                                                                      | C <sub>s</sub>  | B3LYP | UFF     | -474.17131 | 64.12(0) | 5.19 | 83.76 | -1.74   |

|      |                 |       |         |            |           |      |       |         |
|------|-----------------|-------|---------|------------|-----------|------|-------|---------|
| Q_N3 | C <sub>2v</sub> | B3LYP | UFF     | -474.14958 | 63.73 (0) | 5.43 | 84.11 | -9.85   |
| Q_D2 | C <sub>s</sub>  | B3LYP | UAKS    | -472.90361 | 46.52 (0) | 5.07 | 83.54 | -206.48 |
| Q_D3 | C <sub>1</sub>  | B3LYP | UAKS    | -472.89667 | 46.35 (0) | 5.10 | 83.72 | -210.42 |
| Q_M2 | C <sub>s</sub>  | B3LYP | UAKS    | -473.61791 | 55.30 (0) | 5.26 | 84.72 | -70.16  |
| Q_M3 | C <sub>2v</sub> | B3LYP | UAKS    | -473.62107 | 55.61 (0) | 5.09 | 81.99 | -64.09  |
| Q_M4 | C <sub>s</sub>  | B3LYP | UAKS    | -473.60397 | 54.99 (0) | 5.27 | 84.54 | -70.24  |
| Q_N2 | C <sub>s</sub>  | B3LYP | UAKS    | -474.17131 | 64.12 (0) | 5.19 | 83.76 | -14.08  |
| Q_N3 | C <sub>2v</sub> | B3LYP | UAKS    | -474.14958 | 63.73 (0) | 5.43 | 84.11 | -23.93  |
| Q_D2 | C <sub>s</sub>  | B3LYP | Pauling | -472.90361 | 46.52 (0) | 5.07 | 83.54 | -212.32 |
| Q_D3 | C <sub>1</sub>  | B3LYP | Pauling | -472.89667 | 46.35 (0) | 5.10 | 83.72 | -216.00 |
| Q_M2 | C <sub>s</sub>  | B3LYP | Pauling | -473.61791 | 55.30 (0) | 5.26 | 84.72 | -70.25  |
| Q_M3 | C <sub>2v</sub> | B3LYP | Pauling | -473.62107 | 55.61 (0) | 5.09 | 81.99 | -62.94  |
| Q_M4 | C <sub>s</sub>  | B3LYP | Pauling | -473.60397 | 54.99 (0) | 5.27 | 84.54 | -71.77  |
| Q_N2 | C <sub>s</sub>  | B3LYP | Pauling | -474.17131 | 64.12 (0) | 5.19 | 83.76 | -13.06  |
| Q_N3 | C <sub>2v</sub> | B3LYP | Pauling | -474.14958 | 63.73 (0) | 5.43 | 84.11 | -23.97  |
| Q_D2 | C <sub>s</sub>  | B3LYP | Klamt   | -472.90361 | 46.52 (0) | 5.07 | 83.54 | -198.83 |
| Q_D3 | C <sub>1</sub>  | B3LYP | Klamt   | -472.89667 | 46.35 (0) | 5.10 | 83.72 | -202.24 |
| Q_M2 | C <sub>s</sub>  | B3LYP | Klamt   | -473.61791 | 55.30 (0) | 5.26 | 84.72 | -60.18  |
| Q_M3 | C <sub>2v</sub> | B3LYP | Klamt   | -473.62107 | 55.61 (0) | 5.09 | 81.99 | -55.03  |
| Q_M4 | C <sub>s</sub>  | B3LYP | Klamt   | -473.60397 | 54.99 (0) | 5.27 | 84.54 | -62.56  |
| Q_N2 | C <sub>s</sub>  | B3LYP | Klamt   | -474.17131 | 64.12 (0) | 5.19 | 83.76 | -5.35   |
| Q_N3 | C <sub>2v</sub> | B3LYP | Klamt   | -474.14958 | 63.73 (0) | 5.43 | 84.11 | -14.05  |
| Q_D2 | C <sub>s</sub>  | PBE   | UFF     | -472.38501 | 44.85 (0) | 5.29 | 84.96 | -194.00 |
| Q_D3 | C <sub>1</sub>  | PBE   | UFF     | -472.36757 | 44.62 (0) | 5.35 | 85.37 | -198.56 |
| Q_M2 | C <sub>s</sub>  | PBE   | UFF     | -473.09424 | 53.57 (0) | 5.42 | 85.79 | -55.86  |
| Q_M3 | C <sub>2v</sub> | PBE   | UFF     | -473.09699 | 53.89 (0) | 5.22 | 82.84 | -50.85  |
| Q_M4 | C <sub>s</sub>  | PBE   | UFF     | -473.08049 | 53.26 (0) | 5.42 | 85.48 | -58.54  |
| Q_N2 | C <sub>s</sub>  | PBE   | UFF     | -473.64325 | 62.30 (0) | 5.31 | 84.50 | -1.15   |
| Q_N3 | C <sub>2v</sub> | PBE   | UFF     | -473.62178 | 61.86 (0) | 5.58 | 85.07 | -8.79   |
| Q_D2 | C <sub>s</sub>  | PBE   | UAKS    | -472.38501 | 44.85 (0) | 5.29 | 84.96 | -204.86 |
| Q_D3 | C <sub>1</sub>  | PBE   | UAKS    | -472.36757 | 44.62 (0) | 5.35 | 85.37 | -208.68 |
| Q_M2 | C <sub>s</sub>  | PBE   | UAKS    | -473.09424 | 53.57 (0) | 5.42 | 85.79 | -68.68  |
| Q_M3 | C <sub>2v</sub> | PBE   | UAKS    | -473.09699 | 53.89 (0) | 5.22 | 82.84 | -62.79  |
| Q_M4 | C <sub>s</sub>  | PBE   | UAKS    | -473.08049 | 53.26 (0) | 5.42 | 85.48 | -69.45  |
| Q_N2 | C <sub>s</sub>  | PBE   | UAKS    | -473.64325 | 62.30 (0) | 5.31 | 84.50 | -13.75  |
| Q_N3 | C <sub>2v</sub> | PBE   | UAKS    | -473.62178 | 61.86 (0) | 5.58 | 85.07 | -23.87  |
| Q_D2 | C <sub>s</sub>  | PBE   | Pauling | -472.38501 | 44.85 (0) | 5.29 | 84.96 | -208.35 |
| Q_D3 | C <sub>1</sub>  | PBE   | Pauling | -472.36757 | 44.62 (0) | 5.35 | 85.37 | -212.95 |
| Q_M2 | C <sub>s</sub>  | PBE   | Pauling | -473.09424 | 53.57 (0) | 5.42 | 85.79 | -67.61  |
| Q_M3 | C <sub>2v</sub> | PBE   | Pauling | -473.09699 | 53.89 (0) | 5.22 | 82.84 | -61.12  |
| Q_M4 | C <sub>s</sub>  | PBE   | Pauling | -473.08049 | 53.26 (0) | 5.42 | 85.48 | -69.48  |
| Q_N2 | C <sub>s</sub>  | PBE   | Pauling | -473.64325 | 62.30 (0) | 5.31 | 84.50 | -11.83  |
| Q_N3 | C <sub>2v</sub> | PBE   | Pauling | -473.62178 | 61.86 (0) | 5.58 | 85.07 | -22.42  |
| Q_D2 | C <sub>s</sub>  | PBE   | Klamt   | -472.38501 | 44.85 (0) | 5.29 | 84.96 | -196.02 |
| Q_D3 | C <sub>1</sub>  | PBE   | Klamt   | -472.36757 | 44.62 (0) | 5.35 | 85.37 | -200.43 |
| Q_M2 | C <sub>s</sub>  | PBE   | Klamt   | -473.09424 | 53.57 (0) | 5.42 | 85.79 | -58.82  |
| Q_M3 | C <sub>2v</sub> | PBE   | Klamt   | -473.09699 | 53.89 (0) | 5.22 | 82.84 | -53.72  |

|      |                 |       |         |            |          |      |       |         |
|------|-----------------|-------|---------|------------|----------|------|-------|---------|
| Q_M4 | C <sub>s</sub>  | PBE   | Klamt   | -473.08049 | 53.26(0) | 5.42 | 85.48 | -61.24  |
| Q_N2 | C <sub>s</sub>  | PBE   | Klamt   | -473.64325 | 62.30(0) | 5.31 | 84.50 | -4.71   |
| Q_N3 | C <sub>2v</sub> | PBE   | Klamt   | -473.62178 | 61.86(0) | 5.58 | 85.07 | -13.15  |
| Q_D2 | C <sub>s</sub>  | BVP86 | UFF     | -472.94624 | 44.85(0) | 5.25 | 84.65 | -194.92 |
| Q_D3 | C <sub>1</sub>  | BVP86 | UFF     | -472.92986 | 44.28(0) | 5.53 | 87.36 | -199.75 |
| Q_M2 | C <sub>s</sub>  | BVP86 | UFF     | -473.65654 | 53.47(0) | 5.43 | 85.84 | -56.22  |
| Q_M3 | C <sub>2v</sub> | BVP86 | UFF     | -473.65938 | 53.80(0) | 5.22 | 82.84 | -51.37  |
| Q_M4 | C <sub>s</sub>  | BVP86 | UFF     | -473.64278 | 53.16(0) | 5.42 | 85.51 | -58.95  |
| Q_N2 | C <sub>s</sub>  | BVP86 | UFF     | -474.20647 | 62.19(0) | 5.32 | 84.53 | -1.21   |
| Q_N3 | C <sub>2v</sub> | BVP86 | UFF     | -474.18493 | 61.75(0) | 5.59 | 85.13 | -9.09   |
| Q_D2 | C <sub>s</sub>  | BVP86 | UAKS    | -472.94624 | 44.85(0) | 5.25 | 84.65 | -205.81 |
| Q_D3 | C <sub>1</sub>  | BVP86 | UAKS    | -472.92986 | 44.28(0) | 5.53 | 87.35 | -209.87 |
| Q_M2 | C <sub>s</sub>  | BVP86 | UAKS    | -473.65654 | 53.47(0) | 5.43 | 85.84 | -69.09  |
| Q_M3 | C <sub>2v</sub> | BVP86 | UAKS    | -473.65938 | 53.80(0) | 5.22 | 82.84 | -63.18  |
| Q_M4 | C <sub>s</sub>  | BVP86 | UAKS    | -473.64278 | 53.16(0) | 5.42 | 85.51 | -69.82  |
| Q_N2 | C <sub>s</sub>  | BVP86 | UAKS    | -474.20647 | 62.19(0) | 5.32 | 84.53 | -14.06  |
| Q_N3 | C <sub>2v</sub> | BVP86 | UAKS    | -474.18493 | 61.75(0) | 5.59 | 85.13 | -23.86  |
| Q_D2 | C <sub>s</sub>  | BVP86 | Pauling | -472.94624 | 44.85(0) | 5.25 | 84.65 | -209.63 |
| Q_D3 | C <sub>1</sub>  | BVP86 | Pauling | -472.92986 | 44.28(0) | 5.53 | 87.35 | -214.52 |
| Q_M2 | C <sub>s</sub>  | BVP86 | Pauling | -473.65654 | 53.47(0) | 5.43 | 85.84 | -68.23  |
| Q_M3 | C <sub>2v</sub> | BVP86 | Pauling | -473.65938 | 53.80(0) | 5.22 | 82.84 | -61.59  |
| Q_M4 | C <sub>s</sub>  | BVP86 | Pauling | -473.64278 | 53.16(0) | 5.42 | 85.51 | -70.12  |
| Q_N2 | C <sub>s</sub>  | BVP86 | Pauling | -474.20647 | 62.19(0) | 5.32 | 84.53 | -11.99  |
| Q_N3 | C <sub>2v</sub> | BVP86 | Pauling | -474.18493 | 61.75(0) | 5.59 | 85.13 | -22.67  |
| Q_D2 | C <sub>s</sub>  | BVP86 | Klamt   | -472.94624 | 44.85(0) | 5.25 | 84.65 | -196.98 |
| Q_D3 | C <sub>1</sub>  | BVP86 | Klamt   | -472.92986 | 44.28(0) | 5.52 | 87.35 | -201.61 |
| Q_M2 | C <sub>s</sub>  | BVP86 | Klamt   | -473.65654 | 53.47(0) | 5.43 | 85.84 | -59.20  |
| Q_M3 | C <sub>2v</sub> | BVP86 | Klamt   | -473.65938 | 53.80(0) | 5.22 | 82.84 | -54.06  |
| Q_M4 | C <sub>s</sub>  | BVP86 | Klamt   | -473.64278 | 53.16(0) | 5.42 | 85.51 | -61.66  |
| Q_N2 | C <sub>s</sub>  | BVP86 | Klamt   | -474.20647 | 62.19(0) | 5.32 | 84.53 | -4.75   |
| Q_N3 | C <sub>2v</sub> | BVP86 | Klamt   | -474.18493 | 61.75(0) | 5.59 | 85.13 | -13.22  |
| Q_D2 | C <sub>s</sub>  | M052X | UFF     | -472.86642 | 47.78(0) | 4.97 | 82.92 | -200.53 |
| Q_D3 | C <sub>1</sub>  | M052X | UFF     | -472.85893 | 47.48(0) | 5.09 | 83.71 | -204.87 |
| Q_M2 | C <sub>s</sub>  | M052X | UFF     | -473.57744 | 56.55(0) | 5.16 | 84.08 | -59.39  |
| Q_M3 | C <sub>2v</sub> | M052X | UFF     | -473.58409 | 56.91(0) | 5.00 | 81.44 | -53.79  |
| Q_M4 | C <sub>s</sub>  | M052X | UFF     | -473.56607 | 56.25(0) | 5.18 | 84.01 | -62.19  |
| Q_N2 | C <sub>s</sub>  | M052X | UFF     | -474.13281 | 65.28(0) | 5.13 | 83.39 | -2.58   |
| Q_N3 | C <sub>2v</sub> | M052X | UFF     | -474.10786 | 64.85(0) | 5.39 | 83.85 | -10.87  |
| Q_D2 | C <sub>s</sub>  | M052X | UAKS    | -472.86642 | 47.78(0) | 4.97 | 82.92 | -210.55 |
| Q_D3 | C <sub>1</sub>  | M052X | UAKS    | -472.85893 | 47.48(0) | 5.09 | 83.71 | -215.21 |
| Q_M2 | C <sub>s</sub>  | M052X | UAKS    | -473.57744 | 56.55(0) | 5.16 | 84.08 | -72.61  |
| Q_M3 | C <sub>2v</sub> | M052X | UAKS    | -473.58409 | 56.91(0) | 5.00 | 81.44 | -66.32  |
| Q_M4 | C <sub>s</sub>  | M052X | UAKS    | -473.56607 | 56.25(0) | 5.18 | 84.01 | -72.88  |
| Q_N2 | C <sub>s</sub>  | M052X | UAKS    | -474.13281 | 65.28(0) | 5.13 | 83.39 | -15.16  |
| Q_N3 | C <sub>2v</sub> | M052X | UAKS    | -474.10786 | 64.85(0) | 5.39 | 83.85 | -24.83  |
| Q_D2 | C <sub>s</sub>  | M052X | Pauling | -472.86642 | 47.78(0) | 4.97 | 82.92 | -217.74 |
| Q_D3 | C <sub>1</sub>  | M052X | Pauling | -472.85893 | 47.48(0) | 5.09 | 83.71 | -222.15 |

|      |                 |       |         |            |          |      |       |         |
|------|-----------------|-------|---------|------------|----------|------|-------|---------|
| Q_M2 | C <sub>s</sub>  | M052X | Pauling | -473.57744 | 56.55(0) | 5.16 | 84.08 | -73.30  |
| Q_M3 | C <sub>2v</sub> | M052X | Pauling | -473.58409 | 56.91(0) | 5.00 | 81.44 | -65.67  |
| Q_M4 | C <sub>s</sub>  | M052X | Pauling | -473.56607 | 56.25(0) | 5.18 | 84.01 | -74.82  |
| Q_N2 | C <sub>s</sub>  | M052X | Pauling | -474.13281 | 65.28(0) | 5.13 | 83.39 | -14.14  |
| Q_N3 | C <sub>2v</sub> | M052X | Pauling | -474.10786 | 64.85(0) | 5.39 | 83.85 | -25.33  |
| Q_D2 | C <sub>s</sub>  | M052X | Klamt   | -472.86642 | 47.78(0) | 4.97 | 82.92 | -202.76 |
| Q_D3 | C <sub>1</sub>  | M052X | Klamt   | -472.85893 | 47.48(0) | 5.09 | 83.71 | -206.83 |
| Q_M2 | C <sub>s</sub>  | M052X | Klamt   | -473.57744 | 56.55(0) | 5.16 | 84.08 | -62.57  |
| Q_M3 | C <sub>2v</sub> | M052X | Klamt   | -473.58409 | 56.91(0) | 5.00 | 81.44 | -56.69  |
| Q_M4 | C <sub>s</sub>  | M052X | Klamt   | -473.56607 | 56.25(0) | 5.18 | 84.01 | -65.08  |
| Q_N2 | C <sub>s</sub>  | M052X | Klamt   | -474.13281 | 65.28(0) | 5.13 | 83.39 | -6.35   |
| Q_N3 | C <sub>2v</sub> | M052X | Klamt   | -474.10786 | 64.85(0) | 5.39 | 83.85 | -15.11  |

<sup>a</sup>Point group. <sup>b</sup>Zero-point energies and number of imaginary frequencies.

<sup>c</sup>Thermal corrections to 298K. <sup>d</sup>Entropies. <sup>e</sup>Free energy of solvation sum is the energy difference between gaseous and aqueous state and total non-electrostatic contribution. A correction factor of 1.89 kcal/mol should be added to the calculated values to account for the change of state from 1 mol/atm (24.47 L at 298 K in gas phase) to 1 mol/L (aqueous phase).

<sup>f</sup>Calculation based on cc-pVTZ basis set. <sup>g</sup>Calculation based on cc-pVTZ basis set. <sup>h</sup>The series of neutral, monoanion, and dianion isomers based on symbols in Scheme 2.

Table S3. Atomic Radii for Cavity Models

|            | UFF   | UAKS <sup>a</sup> | Pauling | Klamt | SMD   |
|------------|-------|-------------------|---------|-------|-------|
| Hydrogen   | 1.443 | 1.000             | 1.200   | 1.300 | 1.200 |
| Carbon     | 1.925 | 1.500             | 1.500   | 2.000 | 1.850 |
| Nitrogen   | 1.830 | 1.500             | 1.500   | 1.830 | 1.890 |
| Oxygen     | 1.750 | 1.500             | 1.400   | 1.720 | 1.520 |
| Fluorine   | 1.682 | 1.500             | 1.350   | 1.720 | 1.730 |
| Phosphorus | 2.074 | 1.980             | 1.900   | 1.800 | 2.100 |
| Sulfur     | 2.018 | 1.980             | 1.850   | 2.160 | 2.490 |
| Vanadium   | 1.572 | 2.008             | 1.572   | 1.900 |       |
| Arsenic    | 2.115 | 2.115             | 2.000   | 1.900 |       |
| Iron       | 1.456 | 1.456             | 1.456   | 1.900 |       |

<sup>a</sup>In the atom topological model (UATM), the hydrogen atoms are enclosed in the same sphere of the heavy atom they are bound to, and the sphere radii are set according to the atomic number, the charge and the hybridization of the atom, possibly corrected for first neighbor effects. The UAKS values<sup>b</sup> are UATM basis radii optimized for PBE0/6-31G(d). The molecular environment modifies the actual radii. <sup>b</sup>Barone, V.; Cossi, M.; Tomasi, J. *J Chem Phys* 1997, 107, 3210.

Table S4. G4MP2 level of theory for free energies ( $G_{\text{gas}}$ ) of  $\text{H}_2\text{Fe}(\text{CO})_4$ ,  $\text{H}_1\text{Fe}(\text{CO})_4^-$ , and  $\text{Fe}(\text{CO})_4^{2-}$  (hartree unit)

| Steps             | Method                             | $\text{H}_2\text{Fe}(\text{CO})_4$ | $\text{H}_1\text{Fe}(\text{CO})_4^-$ | $\text{Fe}(\text{CO})_4^{2-}$ |
|-------------------|------------------------------------|------------------------------------|--------------------------------------|-------------------------------|
| E (CCSD(T))       | CCSD(T)/m6-31G(d) <sup>a</sup>     | -1715.99603                        | -1715.46509                          | -1714.74594                   |
| •E (MP2)          | MP2/G3MP2LargeXP <sup>a</sup>      | -1716.90714                        | -1716.54064                          | -1715.97107                   |
|                   | MP2/m6-31G(d) <sup>a</sup>         | -1715.93547                        | -1715.54683                          | -1714.97090                   |
| •E (rel)          | CCSD(T)/m6-31G(d) <sup>a</sup>     | -1715.99603                        | -1715.46509                          | -1714.74594                   |
|                   | CCSD(T)/m6-31G(d)+rel <sup>a</sup> | -1723.32529                        | -1722.79726                          | -1722.07780                   |
| •E (HF)           | HF/3                               | -1714.53061                        | -1713.94246                          | -1713.17675                   |
|                   | HF/4                               | -1714.56355                        | -1713.97429                          | -1713.20742                   |
|                   | Extrapolation                      | -1714.57157                        | -1713.98204                          | -1713.21490                   |
|                   | HF/G3LargeXP                       | -1714.50112                        | -1713.91264                          | -1713.14614                   |
| E (HLC)           |                                    | -0.24780                           | -0.24780                             | -0.24780                      |
| ZPE               | B3LYP/m6-31G(2df,p) <sup>b</sup>   | 0.04907                            | 0.04017                              | 0.03194                       |
| T.C.              | B3LYP/m6-31G(2df,p) <sup>b</sup>   | 0.01088                            | 0.01066                              | 0.01031                       |
| -T•S <sup>c</sup> | B3LYP/m6-31G(2df,p) <sup>b</sup>   | -0.04650                           | -0.04635                             | -0.04491                      |
| G(G4MP2)          |                                    | -1724.60176                        | -1724.10380                          | -1723.39720                   |

<sup>a</sup>For MP2 and CCSD(T) level of theory, the number of frozen orbital is 13 (1s,2s,2p orbitals for Fe and 1s orbital for C and O). <sup>b</sup>In frequency calculation process, scale factor 0.9854 is applied for every thermochemical properties. <sup>c</sup>T=298.15K.
